1 **TITLE**

2 Overexpression of the schizophrenia risk gene C4 in PV cells drives sex-dependent behavioral  
3 deficits and circuit dysfunction

4  
5 **AUTHORS**

6 Luke A. Fournier<sup>1#</sup>, Rhushikesh A. Phadke<sup>2</sup>, Maria Salgado<sup>1</sup>, Alison Brack<sup>2</sup>, Jian Carlo Nocon<sup>3-6</sup>,  
7 Sonia Bolshakova<sup>1,7</sup>, Jaylyn R. Grant<sup>8,9</sup>, Nicole M. Padró Luna<sup>9,10</sup>, Kamal Sen<sup>3-6</sup>, Alberto Cruz-  
8 Martín<sup>1,2,\*</sup>

9  
10 **AFFILIATIONS**

- 11 1. Neurobiology Section in the Department of Biology, Boston University, Boston, MA,  
12 United States.  
13 2. Molecular Biology, Cell Biology & Biochemistry Program, Boston University, Boston, MA,  
14 United States.  
15 3. Neurophotonics Center, Boston University, Boston, Massachusetts, United States.  
16 4. Center for Systems Neuroscience, Boston University, Boston, Massachusetts, United  
17 States.  
18 5. Hearing Research Center, Boston University, Boston, Massachusetts, United States.  
19 6. Department of Biomedical Engineering, Boston University, Boston, Massachusetts,  
20 United States.  
21 7. Bioinformatics MS Program, Boston University, Boston, MA, United States.  
22 8. Biological Sciences, Eastern Illinois University, Charleston, IL, United States.  
23 9. The Summer Undergraduate Research Fellowship (SURF) Program, Boston University,  
24 Boston, United States.  
25 10. Biology Department, College of Natural Sciences, University of Puerto Rico, Rio Piedras  
26 Campus, San Juan, Puerto Rico.

27 # Lead author, [lukeaf@bu.edu](mailto:lukeaf@bu.edu)

28 \* Corresponding author, [martini.cruz@gmail.com](mailto:martini.cruz@gmail.com)

29  
30 **KEYWORDS**

31 Prefrontal cortex, complement system, development, neuroimmune, anxiety disorders, sex-  
32 dependent behavior

33

34

35

36

37

38

39 **SUMMARY**

40 Fast-spiking parvalbumin (PV)-positive cells are key players in orchestrating pyramidal neuron  
41 activity, and their dysfunction is consistently observed in myriad brain diseases. To understand  
42 how immune complement dysregulation – a prevalent locus of brain disease etiology – in PV  
43 cells may drive disease pathogenesis, we have developed a transgenic mouse line that permits  
44 cell-type specific overexpression of the schizophrenia-associated complement component 4  
45 (*C4*) gene. We found that overexpression of mouse *C4* (*mC4*) in PV cells causes sex-specific  
46 behavioral alterations and concomitant deficits in synaptic connectivity and excitability of PV  
47 cells of the prefrontal cortex. Using a computational network, we demonstrated that these  
48 microcircuit deficits led to hyperactivity and disrupted neural communication. Finally, pan-  
49 neuronal overexpression of *mC4* failed to evoke the same deficits in behavior as PV-specific  
50 *mC4* overexpression, suggesting that *C4* perturbations in fast-spiking neurons are more harmful  
51 to brain function than pan-neuronal alterations. Together, these results provide a causative link  
52 between *C4* and the vulnerability of PV cells in brain disease.

53

54

55

56

57

58

59

60

61

62

63

64

65

66

67

68

69

70

71

72

## 73 **INTRODUCTION**

74 Cortical parvalbumin (PV)-positive fast-spiking cells are a distinct class of inhibitory neurons  
75 characterized by their expression of the Ca<sup>2+</sup>-binding protein, PV (1–3). Their unique biophysical  
76 properties allow them to drive potent, precise inhibition, effectively controlling the temporal  
77 dynamics of the excitatory and inhibitory inputs (4–6) that support critical brain functions (7–9).  
78 At a network level, PV cells are responsible for generating and regulating gamma oscillations  
79 (10), 30-80 Hz rhythmic fluctuations in brain activity that correlate with cognitive performance  
80 (11–13) and are impaired in anxiety disorders (14), schizophrenia (SCZ) (15,16), and  
81 Alzheimer's Disease (AD) (17,18). Besides controlling the temporal dynamics of excitation and  
82 inhibition and orchestrating oscillatory activity, PV neuron activity tightly regulates cortical  
83 maturation during critical developmental windows (19–21).

84 Despite significant progress in understanding PV cell function in the healthy and diseased brain,  
85 it remains to be determined how specific genetic alterations associated with neuropsychiatric  
86 disorders lead to the dysfunction of inhibitory microcircuits. It is also unclear whether particular  
87 circuitry or synaptic inputs underlying the function of PV cells are susceptible to disease-  
88 associated genetic alterations. For example, in post-mortem tissue of patients with SCZ, the  
89 density of excitatory synapses is decreased on PV cells with concomitant downregulation of PV  
90 and other inhibitory markers (22–25), suggesting that excitatory drive to fast-spiking cells is  
91 compromised in this brain disorder. Moreover, SCZ-associated genetic alterations have been  
92 found to disrupt the molecular machinery underlying feed-forward excitatory inputs to PV  
93 neurons (26–28), suggesting these particular connections are susceptible to genetic  
94 perturbations.

95 The association between the Major Histocompatibility Complex (MHC) and SCZ could provide a  
96 link between immune dysfunction and the disruption of molecular mechanisms that regulate the  
97 wiring of synaptic circuits (29–32). In support of this, Sekar et al. (33) showed that mice that lack  
98 *C4b* (mouse *C4*, *mC4*), which in humans is harbored in the MHC locus, exhibit deficits in the  
99 developmental refinement of retinogeniculate synapses. Furthermore, Comer et al. (34)  
100 demonstrated that increasing levels of the human (*C4A*) and mouse *C4* homologs in layer (L)  
101 2/3 pyramidal neurons (PYRs) of the medial prefrontal cortex (mPFC) – a brain region  
102 associated with the pathology of SCZ (35–37) and other neuropsychiatric conditions (38–40) –  
103 led to pathological synaptic loss during early postnatal development and social behavioral  
104 deficits in mice. This research suggests a link between immune dysfunction and brain disorders,  
105 particularly SCZ, through the role of the MHC and its impact on synaptic development and  
106 plasticity.

107 As a consequence of their unique properties and role in controlling network function, PV cells  
108 exhibit high metabolic demands, which make them vulnerable to oxidative stress and  
109 neuroimmune dysregulation (41–45); these pathological processes are linked to brain disorders  
110 (46–48). Therefore, determining the molecular pathways through which immune imbalances can  
111 impact PV neuron function offers significant potential for unraveling neurodevelopmental  
112 disease etiology. Despite this, there is a notable gap in the availability of models to determine  
113 how neuroimmune dysfunction alters specific brain circuitry. In the same vein, alterations in the  
114 complement pathway have been linked to the pathology of brain disorders (49). However, it  
115 remains an open question whether particular brain cell types are especially vulnerable to  
116 complement dysfunction.

117 Here, we developed and validated a novel mouse line that permits cell-type specific  
118 overexpression of *mC4* (mC4-OE). Utilizing this unique knock in (KI) transgenic mouse, we  
119 demonstrate that increased *mC4* levels in PV cells (PV-mC4-OE) drive pathological anxiety-like  
120 behaviors in male, but not female mice. In both sexes, PV-mC4-OE led to changes in a  
121 subclass of social behavior, indicating that elevated expression of this immune gene in fast-  
122 spiking cells disrupts the circuitry governing social behaviors. We used electrophysiology to  
123 show that excitatory and inhibitory inputs to mPFC PV cells are altered with increased levels of  
124 *mC4* in male, but not female mice, mirroring the sexually dimorphic anxiety-like behavior.

125 Elevated *mC4* in PV neurons had differing impacts on cortical cell excitability: hypoexcitability in  
126 male fast-spiking cells and PYRs, as opposed to enhanced excitability in female fast-spiking  
127 cells. In contrast to PV-cell-specific effects of mC4-OE, increased *mC4* levels in all neurons had  
128 no effects on anxiety-like behavior. This implies that *C4* perturbations in PV cells are more  
129 harmful to brain function than pan-neuronal alterations. Finally, using a computational model,  
130 we demonstrated that deficits in the PV-mC4-OE-driven inhibitory microcircuit disrupt model  
131 pyramidal neuron communication and cause hyperexcitability within the male model network,  
132 illustrating how the interaction of cellular and synaptic traits generates complex sex-dependent  
133 neural network deficits in disease states.

134 In summary, our results show that *mC4* dysregulation in PV neurons led to alterations in  
135 anxiety-like behavior in male mice, which were associated with mPFC circuit dysfunction. Our  
136 results provide crucial insights into the molecular interplay between cell-type-specific increased  
137 levels of *mC4*, defects in mPFC circuitry, and abnormal behavior associated with the prefrontal  
138 cortex.

139

## 140 **METHODS**

### 141 **Ethics Statement and Animals**

142 All experimental protocols were conducted according to the National Institutes of Health (NIH)  
143 guidelines for animal research and were approved by the Boston University Institutional Animal  
144 Care and Use Committee (IACUC; protocol #2018–539). All mice were group-housed (2-4  
145 animals/cage). The light/dark cycle was adjusted depending on the behavioral task (see below).  
146 Unless otherwise stated, food and water were provided *ad libitum* to all mice. Experimental  
147 offspring were reared in the cage with the dam until weaning at postnatal day (P) 21. Stimulus  
148 CD-1 (Charles River Laboratories, strain code: 022, RRID:IMSR\_CRL:022) mice 3-5 weeks of  
149 age were used in social assays. During experiments and analysis, the experimenter was blinded  
150 to mouse genotype and experimental conditions whenever possible.

151 *Generation of the mC4-KI mouse:* Generation of the mC4-KI mouse was accomplished using  
152 Cyagen/Taconic services (Santa Clara, CA). Briefly, the “adenovirus SA-Frt-CAG promoter-Frt-  
153 loxP-3\*polyA-loxP-Kozak-mouse C4b CDS-polyA” cassette was cloned into intron 1 of  
154 ROSA26. The homology arms were generated by PCR using BAC clones as  
155 templates. C57BL/6 ES cells were used for gene targeting. In the targeting vector, the positive  
156 selection marker (Neo) is flanked by SDA (self-deletion anchor) sites. Diphtheria toxin A (DTA)  
157 was used for negative selection. Targeted ES cells were injected into C57BL/6J albino embryos,  
158 which were then re-implanted into CD-1 pseudo-pregnant females. Founder animals were  
159 identified by their coat color, and their germline transmission was confirmed by breeding with  
160 C57BL/6J females and subsequent genotyping of the offspring. Male and female heterozygous

161 targeted mice were generated from clone 1F3 and were bred to establish a colony. Lastly, the  
162 constitutive KI cell allele was obtained after Cre-mediated recombination (see *Breeding*  
163 section).

164 *Breeding*: C57BL/6J (Jackson Laboratory, strain #: 000664, RRID:IMSR\_JAX:000664) mice  
165 were paired with heterozygous mC4-KI transgenics of the same genetic background.  
166 Genotyping (Transnetyx) was used to plan breeding schemes and identify specific genotypes.  
167 Heterozygous mC4-KI transgenics were paired with homozygous PV-Cre mice (Jackson  
168 Laboratory, B6.129P2-Pvalb<sup>tm1(cre)Arbr</sup>/J, strain #: 017320, RRID:IMSR\_JAX:017320). Our  
169 breeding scheme generated mice that inherited the floxed mC4-KI allele, and thus overexpress  
170 (OE) *mC4* in PV cells (PV-mC4-KI, or simply KI), and wild type littermates, which were used as  
171 control mice (PV-mC4-WT, or simply WT).

172 To OE *mC4* in all neurons, heterozygous mC4-KI transgenic mice were paired with homozygous  
173 BAF53b Pan-neuronal-Cre (Jackson Laboratory, STOCK Tg(Actl6b-Cre)4092Jiwu/J, Strain  
174 #:027826, RRID:IMSR\_JAX:027826, (50)) mice. Breeding these two mouse lines yielded mice  
175 that inherited the floxed mC4-KI allele, and thus OE *mC4* in all neurons (PanN-mC4-KI), and  
176 wild type control littermates (PanN-mC4-WT).

177 Our breeding scheme ensured that all experimental mice carried the cre recombinase gene to  
178 control for its effects. PV-mC4-KI or PanN-mC4-KI mice did not exhibit any gross brain  
179 abnormalities, indistinguishable from controls. Additionally, they had similar weights to their  
180 controls, suggesting that besides the described cellular and behavioral deficits, these mice were  
181 otherwise healthy and had no significant defects.

182 A strength of the mC4-KI transgenic mouse is that more moderate levels of mC4-OE can be  
183 driven in a cell-specific manner by crossing the mC4-KI mice to Flp transgenic mice, which  
184 substitutes the strong CAG promoter for the weaker ROSA26 promoter (51,52), allowing the  
185 effects of more moderate transgene expression to be studied.

186

## 187 **Multiplex fluorescence *in situ* hybridization**

188 *Tissue preparation and staining*: For multiplex fluorescence *in situ* hybridization (M-FISH)  
189 experiments, brains of PV-mC4-WT and PV-mC4-KI mice P21-22 or P58-65 were extracted and  
190 immediately embedded in O.C.T. (Tissue-Tek, 4583), flash-frozen on dry ice, and stored in -  
191 80°C until being cut. Prior to slicing, brains were moved to -20°C for 30 min. Slices were cut on  
192 a Leica CM 1800 cryostat at 16 µm at -16 to -19°C and adhered directly onto microscope slides  
193 (Fisher Brand Superfrost Plus, #1255015), which were then stored in -80°C until ready for M-  
194 FISH (<1 week). M-FISH experiments were then performed as directed by the commercially  
195 available kit (RNAScope, Advanced Cell Diagnostics), from which all probes and reagents were  
196 purchased. Fluorescent probes for *mC4* (Mm-C4b, 445161), parvalbumin (Mm-Pvalb-C2,  
197 421931-C2), and somatostatin (Mm-Sst-C3, 404631-C3) were used. To confirm cell bodies in  
198 the slice, nuclei were stained with RNAScope DAPI (320858). After staining, the slices were  
199 mounted with ProLong Diamond Antifade Mountant (ThermoFisher, P36961). Each round of M-  
200 FISH performed contained tissue from both PV-mC4-WT and PV-mC4-KI mice.

201 *Imaging and analysis*: M-FISH images were acquired at 40x on a confocal laser scanning  
202 microscope (Nikon Instruments, Nikon Eclipse Ti with C2Si<sup>+</sup> confocal), controlled by  
203 NisElements (Nikon Instruments, 4.51) including four laser lines (405, 488, 561, and 640 nm), at  
204 a step size of 0.4 µm for nearly the entire thickness of the tissue slice (16 µm). For each round  
205 of M-FISH, consistent imaging parameters were used. Tissue slices imaged and analyzed  
206 belonged to mPFC divisions (prelimbic (PrL), infralimbic (IL), and anterior cingulate (AC)



207 cortices) of the mouse brain. Images predominantly included L2/3, though deeper cortical layers  
208 were also included in the region of interest (ROI). For analysis, a maximum intensity projection  
209 of each z-stack was made (ImageJ, National Institute of Health, Bethesda, Maryland) and  
210 transferred into CellProfiler (53,54) (Broad Institute). Cells were identified and segmented using  
211 DAPI, and the contour was expanded by 10 pixels (approximately 3.1  $\mu\text{m}$ ) to capture the  
212 majority of *Pv*, *Sst*, and *mC4* puncta surrounding the nucleus. Cells were classified as *PV* or  
213 *SST* cells if their expanded contour contained an empirically-derived minimum of 13 or 10 *Pv*- or  
214 *Sst*-positive puncta, respectively. Once identified as a *PV*, *SST*, or non-*PV*/non-*SST* DAPI+  
215 'Other' cell, CellProfiler was used to quantify the number of *mC4*-positive puncta within each  
216 contour (i.e., within each cell).

217

## 218 **PV cell density**

219 *Perfusion and immunohistochemistry:* Mice P55-74 were anesthetized with a 4% isoflurane-  
220 oxygen mixture (v/v) and perfused transcardially with phosphate-buffered saline (PBS, Gibco,  
221 Life Science Technologies, 70011044) followed by 4% paraformaldehyde (PFA) in PBS.  
222 Extracted brains were further fixed in PFA for 24 h before being transferred to a 30% (w/v)  
223 sucrose solution and stored at 4°C. Brain slices were cut at 40  $\mu\text{m}$  on a freezing stage sliding  
224 microtome (Leica SM2000) and stored in PBS. From each mouse, two brain slices were  
225 selected for immunostaining: one at approximately Bregma +1.98 mm and another at Bregma  
226 +0.98 mm along the anterior-posterior (A-P) axis. Slices were first blocked and made permeable  
227 in a solution containing 10% donkey serum (Sigma-Aldrich, S30-100ML) and 1% Tritonx100  
228 (Sigma-Aldrich, X100-100ML) in PBS. Next, after applying the primary antibody (rabbit anti-PV,  
229 Abcam, ab11427) at a 1:250 dilution, slices were placed on a shaker at 4°C for 48 h. Slices  
230 were then washed 4 x 15 min with 0.025% Tritonx100 in PBS. Next, the secondary antibody  
231 was applied (anti-rabbit STAR RED, Abberior, STRED) at a 1:500 dilution and returned to the  
232 shaker for 48 h at 4°C. Slices were then washed 4 x 15 min in PBS, and mounted onto 1 mm  
233 microscope slides (Globe Scientific, #1324) with DAPI Fluoromount (Thermo Fisher Scientific,  
234 Cat. #: 00-4959-52).

235 *Imaging and Analysis:* Cell density imaging was acquired (laser lines 405 and 640 nm) at a step  
236 size of 1  $\mu\text{m}$  for nearly the entire thickness of the tissue slice (40  $\mu\text{m}$ ). For each animal, the  
237 mPFC was imaged at 20x in both the slice at Bregma +1.98 mm (6 ROIs total, 3/hemisphere,  
238 that include the PrL, IL, and AC cortices) and the slice more posterior at Bregma +0.98 mm (4  
239 ROIs, 2/hemisphere, all AC). Consistent imaging parameters were maintained across all  
240 imaging sessions. Images were analyzed as TIFFs in ImageJ and compared to a brain atlas to  
241 identify brain regions (55,56). The intensity value in the PV channel for each ROI (in a brain  
242 slice) and the average background signal for each brain slice were quantified. To binarize cells  
243 as PV-positive, we calculated an intensity threshold and classified cells as PV-positive if their  
244 intensity value was higher than this threshold. These data were used to calculate the number of  
245 PV cells that were positive. To calculate density, we determined the area (excluding L1) of the  
246 ROI in which PV cells were counted and calculated the 3D volume (in  $\text{mm}^3$ ) by multiplying the  
247 2D area of each slice by the depth of the tissue imaged (the Z-stack).

248

## 249 **Behavior**

250 *General experimental conditions:* P40-60 mice were used for all behavioral assays, group  
251 housed in sets of 2-3 mice per cage. Mice were used in either (1) a series of anxiety-related  
252 assays or (2) a series of sociability assays. The specific sequence of anxiety-related assays that

253 mice were exposed to was consistent across all mice and proceeded in the following order:  
254 open field (OF) and elevated zero maze (EZM, performed on the same day), light-dark box  
255 (LDB), and novelty-suppressed feeding (NSF) (Novel arena and cage NSF, performed back-to-  
256 back).

257 Similarly, the specific sequence of sociability assays that mice were exposed to was also  
258 consistent across all mice: Object and juvenile interaction (performed immediately back-to-back  
259 for each mouse, see *Object and social interaction*) was followed by the three-chamber  
260 sociability assay.

261 Seven days prior to the first day of handling (see *Handling* below), mice were genotyped  
262 (Transnetyx), transferred to a fresh cage, and placed with a *Do Not Handle* card to minimize  
263 human handling and stress. Mice were reliably identified using a set of ear hole-punches  
264 throughout behavioral experiments.

265 All behavioral assays were performed at a similar time of the day. Mice used in anxiety-related  
266 assays were reared on a 12 h light/dark cycle with lights on at 7 AM and lights off at 7 PM, and  
267 assays were performed under white light (Adorama, 13" Dimmable LED Ring Light). The  
268 intensity of light used for each assay was consistent each time the assay was performed, but  
269 varied dependent on the assay (see specific assays below). Each day, the lux was measured  
270 and adjusted to the appropriate level for the assay being performed (Dr.meter LX1330B). Mice  
271 used in sociability assays were reared on an inverted light/dark schedule, with lights on at 7 PM  
272 and lights off at 7 AM, and assays were performed under red light (Amazon Basics 60W  
273 Equivalent, Red) to minimize the stress-inducing effects of bright white light and to remain  
274 consistent with their inverted light/dark schedule. Behavioral assays in a given series were  
275 always separated by at least two days but never more than four days. On all days of behavioral  
276 experiments and handling, mice were retrieved from the facility and left in the behavior room to  
277 acclimate to the environment for at least 1 h. Once all mice in a cage completed the assay, all  
278 were returned to their original home cage.

279 Acquisition of behavior data for all anxiety-related assays and the three-chamber assay was  
280 recorded using Logitech C922x Pro Stream Webcams at 30 frames per second (fps) via the  
281 open-source UCLA miniscope software (57). Acquisition of object and juvenile interaction data  
282 was recorded at 30 fps using a Teledyne Flea3 USB3 camera (Model: FL3-U3-13E4C-C: 1.3  
283 MP, e2v EV76C560) via an in-house, python-based, open-source video acquisition software,  
284 REVEALS (<https://github.com/CruzMartinLab/REVEALS>) (58).

285 Throughout all components of behavioral assays and handling, gloves and a lab coat were  
286 worn. Gloves, behavioral arenas, and any relevant objects or cups used during the assay were  
287 sprayed with 70% ethanol in between handling mice or between each new mouse performing a  
288 given assay.

289 All behavioral assays were performed blind to condition, and analysis was performed via custom  
290 code written in MATLAB (MathWorks) (see *Behavior Analysis* below).

291 *Handling*: The first assay of each series was always preceded by three consecutive days of  
292 handling. Mice involved in anxiety-related assays were handled under standard, ambient room  
293 lighting (270 lux), and mice involved in sociability assays were handled under red light.

#### 294 Anxiety-related Assays

295 Anxiety-inducing arenas were custom-made as described in Johnson et al. (59).

296 *Open field (OF)*: Mice were placed in the center of a custom-made OF, a (45 × 45 × 38 cm,  
297 length x width x height) black arena under 200 lux of white light, and were free to explore for 10  
298 min. The OF was used to measure locomotion by measuring the distance traveled by the mice.

299 *Elevated zero maze (EZM)*: The EZM is an elevated (63 cm) circular platform with a 5 cm track  
300 width and diameter of 60 cm. It is comprised of two closed arms with a wall height of 14 cm and  
301 two open arms that lack walls. The EZM was run under 200 lux of white light for 10 min.

302 *Light-dark box (LDB)*: The LDB uses the frame of the OF, but inserted into the OF is a black  
303 divider (45 x 38 cm, length x height) that divides the OF into two distinct zones 1/3 and 2/3 the  
304 width of the OF, but features a small passage-way at the bottom (7.6 x 7.6 cm, width x height) to  
305 allow the mice to move freely between zones. Over the smaller zone (45 x 15 cm, length x  
306 width) is a black lid that blocks all light: this is the dark zone. Because there is no lid over the  
307 remaining 2/3 of the OF (45 x 30 cm, length x width), this is the light zone. The LDB was run  
308 under 300 lux of white light for 10 min.

309 *Novelty-suppressed feeding (NSF)*: 24 h before the start of experimentation, mice were  
310 transferred to a clean cage that possessed no food. During the assay, mice were placed in a  
311 novel, open arena (50 x 35.5 x 15 cm, length x width x height) with a single, fresh food pellet  
312 strapped down in the center of the arena with a rubber band. The experimenter watched the live  
313 video feed to observe when the mouse traveled to the center of the maze and began feeding on  
314 the food pellet, which concluded the assay. Simple investigation or sniffing of the pellet was not  
315 considered feeding. The NSF was the only hand-scored assay, and was done so by a trained,  
316 blinded experimenter. To measure the latency to feed, the researcher watched the trial back  
317 and determined the exact frame that the mouse first bit the pellet. In the rare event that the  
318 mouse did not eat the pellet in the time allotted (10 min recording), that mouse was excluded  
319 from the NSF analysis. The NSF was run under 200 lux of white light.

320 *Cage NSF*: Immediately following the NSF, mice were placed in a fresh cage with approximately  
321 10 food pellets placed in one corner of the cage. Again, the latency to feed was recorded by the  
322 experimenter. The Fresh Cage NSF served to determine and verify the anxiety-inducing nature  
323 of the arena relative to the more familiar environment of a standard mouse cage.

324 *Z-Anxiety quantification*: Z-Anxiety quantification was adapted from Guilloux et al. (60). For each  
325 individual assay, the mean ( $\mu$ ) and standard deviation ( $\sigma$ ) of the relevant metric for that assay  
326 (e.g., EZM: time spent in open arms) for all WT animals was calculated. For any given mouse in  
327 any single assay, whose performance in that assay (e.g., EZM: time spent in open arms) is  
328 given by  $x$ , the z-score is the following:

$$329 \quad z - score_{assay} = \frac{x - \mu}{\sigma}$$

330 To be consistent with a positive z-score being indicative of increased anxiety, the sign of the z-  
331 score in the EZM and LDB was multiplied by -1. In this way, less time spent in the open arms  
332 (EZM) or in the light zone (LDB), indicators of increased anxiety-like behavior, yielded positive  
333 z-score values. For the NSF, because an increased latency to feed was indicative of anxiety-like  
334 behavior, these z-scores were not multiplied by -1. Each animal's Z-Anxiety is simply an  
335 average across all three assays, given by the following:

$$336 \quad Z - Anxiety = \frac{(z - score_{EZM} * -1) + (z - score_{LDB} * -1) + (z - score_{NSF})}{3}$$

337



338 For the sex-separated quantification of Z-Anxiety, the only modification made was that the z-  
339 score for each assay for all males was found in reference to the WT male average and standard  
340 deviation; likewise, z-scores for females were made in reference to the WT female average and  
341 standard deviation for each assay.

#### 342 Sociability Assays

343 *Object and social interaction:* Mice were habituated to the empty, clear arena (46 x 23 cm).  
344 Once 120 s elapsed, a single novel object made from two glued 6-well plates was temporarily  
345 secured at one end of the arena with a magnet. Mice were free to explore this object for another  
346 120 s. After this time elapsed, the novel object was removed, and was immediately replaced by  
347 a novel, juvenile (3-5 weeks old), sex-matched CD-1 stimulus mouse. These mice were then  
348 free to interact with one another unencumbered for 120 s.

349 *Three-chamber sociability assay:* One day prior to the three-chamber assay, mice were  
350 habituated to the three-chamber apparatus (three 46 x 23 cm chambers connected by  
351 passageways 10 cm wide). These mice were free to explore the entire three-chamber arena  
352 with an empty wire-mesh pencil cup in each of the two end chambers for 5 min. On that same  
353 day, stimulus CD-1 mice were habituated to being placed underneath these wire-mesh pencil  
354 cups for 5 min. The next day, the three-chamber assay was performed as follows. A novel,  
355 juvenile, sex-matched CD-1 stimulus mouse was placed underneath a cup in the chamber at  
356 one end of the arena, and an empty cup was placed in the chamber at the other end of the  
357 arena. Weights sat on top of the cups to ensure that the CD-1 stimulus mouse was secure in the  
358 cup and that the experimental mouse would not move either cup. To begin the assay, dividers  
359 were placed in the three-chamber passageways to block movement between chambers, and the  
360 experimental mouse was placed in the center chamber. After the mouse explored the center  
361 chamber for 120 s, the inserts were removed, and the mouse was free to explore the entire  
362 three-chamber arena, as well as the empty cup and mouse cup for 10 min. The chambers in  
363 which the mouse cup and empty cup were placed was alternated randomly across mice. The  
364 percent time spent in each of the three chambers was scored.

#### 365 Behavior Analysis

366 In all behavioral assays (except for the NSF and Fresh Cage NSF), mice and relevant  
367 behavioral arena components were tracked using DeepLabCut (DLC) (61). To ensure the  
368 accuracy of tracking by DLC, a random sampling of videos from each day of experimentation  
369 were inspected. Next, a trained experimenter watched annotated videos to verify consistent  
370 tracking of fiducial points. Fiducial points included the snout, the nose bridge, the head, left and  
371 right ears, and five points that ran along the sagittal axis of the mouse body from the neck to the  
372 base of the tail. All corners of all arenas were labeled, as well as any relevant features of the  
373 arenas, including corners of objects and cups, and the thresholds separating the open and  
374 closed arms of the EZM. To calculate the interaction times, binary behavior matrices (vectorized  
375 behavior) indicating the location of the relevant key points of the mouse with respect to relevant  
376 key points of the arena (e.g., head of mouse and corner of object) were created using custom  
377 MATLAB scripts, available at ([https://github.com/CruzMartinLab/PV-  
378 mC4\\_Project/tree/main/behavior\\_code](https://github.com/CruzMartinLab/PV-mC4_Project/tree/main/behavior_code)).

379

#### 380 **Neonatal viral injections**

381 To genetically tag and identify PV cells in electrophysiology experiments, P1-3 pups were  
382 injected with 360 nL of AAV1-FLEX-tdTomato (titer:  $2.5 \times 10^{13}$  vg/mL, Addgene #28306) per  
383 cortical hemisphere. Borosilicate pipettes (BF150-117-10, Sutter Instrument Co., Novato,

384 California) were pulled to a fine tip (approximately 3-15  $\mu\text{m}$ ) and back-filled with mineral oil and  
385 inserted into the Nanoject Injector (Drummond, Nanoject II, 3-000-204/205A/206A). After cutting  
386 the tip of the pipette and emptying roughly half of the mineral oil, the pipette was filled with virus  
387 solution from the open tip. Prior to injection, pups were anesthetized via a cold-plate  
388 (approximately 15 min) and remained on the cold surface of an ice pack during injection to  
389 ensure continued anesthesia throughout the entire process. The mPFC was targeted along the  
390 anterior-posterior axis and hit consistently using empirically derived landmarks and the Allen  
391 Brain Atlas (55). From here, the tip of the pipette was moved medially into position immediately  
392 adjacent to the midline. Injections at several depths were made to ensure effective labeling of  
393 the entire dorsal-ventral depth of mPFC target sub-regions. Fine spatial navigation of the tip was  
394 made using a stereotax (Kopf Instruments, Tujunga, California). Post-injection, pups recovered  
395 in a plastic chamber that was placed on top of a heated blanket. Pups were returned to the dam  
396 once fully recovered.

397

## 398 **Electrophysiology**

399 *Acute slice preparation and recording:* Mice (P40-62) were anesthetized with a 4% isoflurane-  
400 oxygen mixture (v/v) and perfused intracardially with ice-cold Perfusion/Slicing artificial  
401 cerebrospinal fluid (P/S-aCSF) bubbled with 95%  $\text{O}_2$ / 5%  $\text{CO}_2$  containing the following (in mM):  
402 3 KCl, 26  $\text{NaHCO}_3$ , 1.25  $\text{NaH}_2\text{PO}_4$ , 212 sucrose, 10 glucose, 0.2  $\text{CaCl}_2$ , and 7  $\text{MgCl}_2$  (300-310  
403 mOsm). Thirty min before slicing, 200 mL of P/S-aCSF was transferred to  $-20^\circ\text{C}$  until turned to a  
404 slushy consistency. Coronal slices 300- $\mu\text{m}$  thick were cut in this slushy P/S-aCSF using a  
405 VT1000 S (Leica) vibratome and were then transferred to a Recording aCSF (R-aCSF) solution  
406 bubbled with 95%  $\text{O}_2$ / 5%  $\text{CO}_2$  containing the following (in mM): 125 NaCl, 2.5 KCl, 25  $\text{NaHCO}_3$ ,  
407 1.4  $\text{NaH}_2\text{PO}_4$ , 16 glucose, 0.4 Na-ascorbate, 2 Na-pyruvate, 2  $\text{CaCl}_2$ , and 1  $\text{MgCl}_2$  (300-310  
408 mOsm). Slices were incubated in this R-aCSF for 30 min at  $35^\circ\text{C}$  before being allowed to  
409 recover at room temperature for 1 h prior to recording.

410 Whole-cell voltage- and current-clamp recordings were performed in Layer (L) 2/3 of the PrL, IL,  
411 and AC cortex divisions of the mPFC (34). For all recordings, tdTomato-positive PV cells were  
412 identified using a Prior Lumen 200 Light Source (Prior Scientific) and a CMOS camera (Rolera-  
413 Bolt-M-12; 1.3 MP, Mono, 12-BIT, Uncooled, QImagingBolt) mounted on an Olympus BX51WI  
414 microscope (Olympus America, Inc.). Pyramidal neurons (PYRs) were identified based on  
415 morphological and electrophysiological properties. All recordings were performed at  $29-31^\circ\text{C}$ .  
416 Signals were recorded with a 5X gain, low-pass filtered at 6 kHz, and digitized at 10 kHz using a  
417 patch-clamp amplifier (Multiclamp 700B, Molecular Devices). Nearly all recordings were made  
418 using 3-5 M $\Omega$  borosilicate pipettes (Sutter, BF-150-117-10). Series ( $R_s$ ) and input resistance  
419 ( $R_{in}$ ) were monitored throughout the experiment by measuring the capacitive transient and  
420 steady-state deflection in response to a  $-5$  mV test pulse, respectively. Liquid junction potentials  
421 were calculated and left uncompensated.

422 *Miniature post synaptic currents (mPSCs):* For recording miniature excitatory post synaptic  
423 currents (mEPSCs), borosilicate pipettes were filled with an internal recording solution that  
424 contained the following (in mM): 120 Cs-methane sulfonate, 8 NaCl, 10 HEPES, 10 CsCl, 10  
425  $\text{Na}_2$ -phosphocreatine, 3 QX-314-Cl, 2  $\text{Mg}^{2+}$ -ATP, and 0.2 EGTA (292mOsm, adjusted to pH 7.3  
426 with CsOH). PV cells and PYRs were voltage clamped at  $-70$  mV in the presence of  
427 tetrodotoxin (TTX, 1  $\mu\text{M}$ , Tocris) and picrotoxin (PTX, 100  $\mu\text{M}$ , HelloBio). 6-9 mice per sex per  
428 condition from 3-4 litters were used to collect all mEPSC data for PV cells and PYRs.

429 For recording miniature inhibitory post synaptic currents (mIPSCs), borosilicate pipettes were  
430 filled with a high-chloride internal recording solution that contained the following (in mM): 60 Cs-

431 methane sulfonate, 8 NaCl, 70 CsCl, 10 HEPES, 10 Na<sub>2</sub>-phosphocreatine, 0.2 EGTA, and 2  
432 Mg<sup>2+</sup>-ATP (290 mOsm, adjusted to pH 7.3 with CsOH). PV cells and PYRs were voltage  
433 clamped at -70 mV in the presence of TTX (1 μM), CNQX (20 μM), and DL-APV (50 μM).  
434 Because this high-chloride internal solution has a chloride reversal potential of -13 mV, mIPSCs  
435 were inward. 4-6 mice per sex per condition from 3-5 litters were used to collect all mIPSC data  
436 for PV cells and PYRs.

437 *mPSC analysis*: mPSCs were identified and their amplitude, frequency, rise, and decay  
438 determined using custom scripts written in MATLAB. At least 120 s were analyzed for each cell.  
439 All mPSC raw traces were first lowpass filtered in Clampfit (Molecular Devices) using a boxcar  
440 filter. Next, local minima in the trace were recognized by identifying potential synaptic events  
441 using the native *islocalmin()* MATLAB function. After these events were filtered, a series of  
442 steps were taken to remove false-positives while simultaneously limiting the number of false  
443 negatives. More specifically, we calculated a threshold based on the standard deviation of the  
444 noise of the raw trace within a 1 s temporal window to differentiate the background noise from  
445 mPSCs, thus setting an amplitude threshold. Next, a series of thresholds based on the rise and  
446 decay times were used to filter subsequent postsynaptic events. For all remaining mPSCs,  
447 amplitude is given as the difference between the baseline current value (determined using a  
448 highly smoothed line of the raw data that effectively serves as a moving baseline of the trace) at  
449 the time when the peak reaches a minimum current value and the average of the 10 points  
450 around the absolute minimum of that mPSC peak.

451 Frequency (in Hz) of postsynaptic events is given by the number of mPSCs per sec. Rise<sub>10-90</sub> is  
452 defined as the time (ms) it takes for the mPSC to progress from 10 to 90% of the peak of that  
453 mPSC. To find the Decay<sub>tau</sub>, for each event, the trace from the peak of the mPSC to its return to  
454 baseline is isolated and fit to a single-term exponential. Between groups, R<sub>s</sub> values for each cell  
455 type were not statistically significant.

456 R<sub>s</sub> for PV cells (mEPSCs) were as follows (in MΩ): WT males: 16.85 ± 1.17; WT females: 17.35  
457 ± 1.26; KI males: 16.27 ± 1.33; KI females: 15.56 ± 1.21. R<sub>s</sub> for PV cells (mIPSCs) were as  
458 follows (in MΩ): WT males: 15.79 ± 1.06; WT females: 13.93 ± 1.09; KI males: 15.40 ± 1.46; KI  
459 females: 14.07 ± 0.79. R<sub>s</sub> for PYRs (mEPSCs) were as follows (in MΩ): WT males: 15.94 ±  
460 0.92; WT females: 14.81 ± 0.75; KI males: 15.07 ± 0.73; KI females: 15.00 ± 0.80. R<sub>s</sub> for PYRs  
461 (mIPSCs) were as follows (in MΩ): WT males: 14.43 ± 1.05; WT females: 13.81 ± 0.92; KI  
462 males: 16.13 ± 1.34; KI females: 14.88 ± 1.26.

463 *Active and passive properties*: To determine the active and passive properties of PV cells and  
464 PYRs, borosilicate pipettes were filled with an internal solution that contained the following (in  
465 mM): 119 K-gluconate, 6 KCl, 10 HEPES, 0.5 EGTA, 10 Na<sub>2</sub>-phosphocreatine, 4 Mg<sup>2+</sup>-ATP, and  
466 0.4 Na-GTP (292 mOsm, adjusted to pH 7.3 with KOH). Cells were held at -65 mV during  
467 recording, and the bath was perfused with CNQX (20 μM), DL-APV (50 μM), and PTX (100 μM).  
468 Excitability was assessed by measuring membrane voltage changes (i.e., current-evoked Action  
469 Potentials (APs)) to a spiking protocol that applied 500 ms square current pulses to the patched  
470 cell, beginning at -250 pA and increasing in 30 pA steps to a max current injection of 470 pA.  
471 Passive properties of the patched cells were determined via a 500 ms, -20 pA square pulse that  
472 preceded the square pulse of increasing current amplitude. This protocol was run and recorded  
473 2-3 times per cell, and final values were averaged across recordings for each cell. 5-7 mice per  
474 sex per condition from 4-5 litters were used to collect all active and passive properties data for  
475 PV cells and PYRs.

476 *Active properties analysis*: To quantify spike frequency (Hz), the number of spikes (temporally  
477 defined as when the rising phase of the spike crossed 0 mV) was divided by the length of the

478 current pulse (0.5 s). Rheobase was defined as the minimum current injection that evoked at  
479 least a single AP. The inter-spike interval (ISI) was determined by finding the difference (in ms)  
480 between the crossing of 0 mV of one spike to the crossing of 0 mV by the next spike. To capture  
481 time-dependent changes in the frequency of APs, ISI 1/9 and 4/9 were determined by dividing  
482 the first ISI by the fourth and ninth ISI, respectively. ISI ratios were taken from the first sweep  
483 with at least 10 spikes. To determine the threshold voltage ( $V_{\text{thresh}}$ ) for an AP, for all spikes at  
484 each current injection, the derivative of the membrane voltage was taken across time to find the  
485 inflection point that corresponded with the beginning of the rising phase (i.e., threshold).  
486 Threshold voltages for all spikes were then averaged to arrive at a single value of  $V_{\text{thresh}}$ . Reset  
487 voltage ( $V_{\text{reset}}$ ) was defined as the minimum voltage value between spikes. A single value for  
488  $V_{\text{reset}}$  was obtained in the same way as was done for  $V_{\text{thresh}}$ .  $V_{\text{thresh}}$  and  $V_{\text{reset}}$  were used as  
489 parameters in the computational model.

490 *Passive properties analysis:* To obtain the  $R_{\text{in}}$ , the difference between the baseline voltage  
491 (holding membrane voltage of approximately -65 mV) and the average voltage response to a -  
492 20 pA injection (measured at steady state) was divided by that current injection value of 20 pA.  
493 The membrane time constant,  $\tau_m$ , was the fitted response to the -20 pA injection. Membrane  
494 Capacitance ( $C_m$ ) was determined by dividing  $\tau_m$  by the  $R_{\text{in}}$ . The resting membrane potential  
495 ( $V_m$ ) was measured as the potential before any current was injected. Finally, Voltage Sag Ratio  
496 was determined by dividing the difference between the minimum voltage at the peak deflection  
497 to a -500 pA current injection and the voltage of the steady state response by the difference  
498 between the minimum voltage at the peak deflection and the baseline voltage.

499 Electrophysiological data were analyzed using custom routines written in MATLAB, available at  
500 ([https://github.com/CruzMartinLab/PV-mC4\\_Project/tree/main/ephys\\_code](https://github.com/CruzMartinLab/PV-mC4_Project/tree/main/ephys_code)).

501

## 502 **Computational Model**

### 503 Model Neurons

504 Using the DynaSim toolbox (62), PYR and PV cells for each of the four networks – PV-mC4-WT  
505 and PV-mC4-KI male, and PV-mC4-WT and PV-mC4-KI female – were modeled as leaky  
506 integrate-and-fire neurons whose membrane voltage,  $V_m$ , as a function of time,  $t$ , were given by  
507 the following:

$$508 \quad \text{Eqn 1.} \quad \frac{dV_m}{dt} = \frac{(E_L - V_m) - R_m g_{\text{sra}}(V_m - E_K) - R_m i_{\text{syn}} + R_m i_t}{\tau_m}$$

509

510 where  $E_L$  is the equilibrium potential,  $R_m$  is the membrane resistance,  $g_{\text{sra}}$  is the spike-rate  
511 adaptation,  $E_K$  is the potassium reversal potential,  $i_{\text{syn}}$  is the synaptic input,  $i_t$  is the applied  
512 current, and  $\tau_m$  is the product of  $R_m$  and membrane capacitance ( $C_m$ ). Values used for  $E_L$ ,  $R_m$ ,  
513  $E_K$  (-102mV), and  $C_m$  were derived from the experimental data (**Table S5**), and differed from  
514 network to network only when there was a significant difference in the value of that variable  
515 between WT and KI mice overall or within-sex. If no significant difference was identified in a  
516 given parameter, the average across all sexes and conditions was taken and used uniformly  
517 across all networks.

518



## 519 Establishing Model Neurons

520 For each of the four conditions, and by extension each of the four networks, a single model PYR  
521 and single model PV cell were generated. To create each model neuron, a waveform ( $i_t$ ) was  
522 matched to a subsection of the spiking protocol used during the experiment. The  $i_t$  waveform  
523 consisted of 17 sweeps of a square current pulse (500 ms) beginning at -10 pA, increasing in 30  
524 pA steps, and finishing at 470 pA. From here, firing rates were extracted to construct frequency-  
525 current (FI) curves for each model cell that were used to compare to the experimental FI curves.  
526 An additional term,  $R_m \cdot i_{std}$ , was added to the numerator of equation 1 (Eqn 1). This term served  
527 to shift the baseline voltage from  $V_m$  to -65 mV during the simulation, replicating the  
528 experimental conditions of current clamp under which the experimental data were acquired.  $i_t$   
529 was multiplied by a scale factor,  $I_{act}$ , representing active conductances and other intrinsic  
530 excitability properties which improved the fitting of the modeled FI curve to that of its  
531 experimental counterpart (Fig. S5). This same scale factor was used for  $i_{syn}$  to model the  
532 changes in intrinsic excitability. Reset voltage ( $V_{reset}$ ) and threshold voltages ( $V_{thresh}$ ) were  
533 determined experimentally, and the selection of the specific values used in each model cell  
534 followed the same logic as that for  $E_L$ ,  $R_m$ , and  $C_m$ . An increase in  $V_m$  above  $V_{thresh}$  constituted a  
535 spike, and  $V_m$  was then reduced to  $V_{reset}$  for an absolute refractory period,  $t_{ref}$ , of 1 ms.

536 For all PYR and PV cells, spike rate adaptation time constants ( $\tau_{sra}$ ) were set to 100 and 5 ms,  
537 respectively, reflecting the strong adaptation observed in regular-spiking PYRs and nominal  
538 levels of adaptation in fast-spiking PV cells (63–65). Implementation of spike-rate adaptation  
539 was accomplished by the following (66):

540 Eqn 2a. 
$$\frac{dg_{sra}}{dt} = -\frac{g_{sra}}{\tau_{sra}}$$

541 Eqn 2b. 
$$g_{sra} \rightarrow g_{sra} + \Delta g_{sra}$$

542 Moreover, spike-rate adaptation conductance was increased by an increment,  $\Delta g_{sra}$ , which  
543 returns to zero in time  $\tau_{sra}$  (67). All model cells closely matched their experimental counterparts  
544 (Fig. S5).

545

## 546 Establishing Networks

547 *Simulating Network Noise:* All PYR and PV model cells received random input to simulate  
548 network noise at levels that caused these model cells to fire at typical spontaneous rates  
549 observed experimentally, 3-4 Hz for PYRs and 28-35 Hz for PV cells (68,69). For each  
550 simulation, a random number of brief current pulses within a specified range to evoke the  
551 aforementioned basal firing rates was selected for PYR and PV model cells. Moreover, for each  
552 simulation, the time at which these pulses were applied to each cell were randomized as well.

553 *Network Architecture:* Individual networks were built to simulate WT male, KI male, WT female,  
554 and KI female conditions. For each of the four networks, fifteen 3 s simulations were run, the  
555 simulations serving as our statistical replicates.

556 Each network consisted of a PYR and PV circuit in a generalized input and output layer. In the  
557 input layer, PYR1 and PV1 simultaneously received an identical applied current,  $i_i$ . In all network  
558 simulations,  $i_i$  consisted of a 4 Hz, fixed-amplitude sine wave atop the final 2 s of a 2.5 s, 50 pA  
559 DC component. The use of a non-varying DC component combined with a phasic sine wave



560 input was used here to model dynamic input in an interpretable way (70,71) while preserving  
 561 biological relevance (72–75) in our model. The first and final 250 ms of each simulation had no  
 562 applied current. For all data plotted, only the 2 s in which the sine wave was applied was  
 563 considered for analysis. Each of the fifteen simulations for a given network contained three trials  
 564 in which the only variable altered was the peak of the sine wave (i.e., the peak of the applied  
 565 current,  $i_t$ ): 200, 275, and 350 pA.

566 With respect to network connectivity, PYR1 synapses onto both PYR2 and PV2, in the output  
 567 layer. PV1 synapses onto PV2. PV2 synapses onto PYR2. This specific feed-forward  
 568 arrangement was selected such that all four basic connectivity sub-types (E->E, E->I, I->E, and  
 569 I->I) sampled experimentally via mEPSCs and mIPSCs recorded in both PYR and PV cells  
 570 could be included and thus be leveraged to better understand the effects of increased levels of  
 571 *mC4* in PV cells on the firing properties of model neurons. This feed-forward network  
 572 architecture is an adaptation of that used by Nocon et al. (76), but was further modified using  
 573 arrangement principles similar to those used by Seay et al. (77) and Moore et al. (78). Notably,  
 574 our model lacks feed-back circuitry and classical inhibitory action of other interneuron types, and  
 575 favors single synapses over a population construction. Motivating these explicit simplifications  
 576 for our current model was the benefit in interpreting the changes in the output model cells and  
 577 an acknowledgement that the experimental data upon which many aspects of the model are  
 578 founded come from *ex vivo*, rather than *in vivo*, data.

579 *Synaptic Connectivity*: To model postsynaptic currents (PSCs), after first setting all synaptic  
 580 weights to the same fixed value across all four networks, weights were altered by adjusting the  
 581 conductance of the inputs only where there were significant changes in the experimental  
 582 mEPSC and/or mIPSC data recorded in PYR and PV cells (**Table S6**). These weights were  
 583 adjusted by the same percent change as that observed in the mEPSC or mIPSC frequency or  
 584 amplitude of the experimental data. In line with previous models (67,76,77), short-term  
 585 depression was employed in all synapses. PSCs were modeled via the difference of two  
 586 decaying exponential functions (76) featuring time constants where  $\tau_1 > \tau_2$ :

587 Eqn 3. 
$$s(t) = B \left( e^{-\frac{t}{\tau_1}} - e^{-\frac{t}{\tau_2}} \right) u(t)$$

588 where B is a normalization constant,  $s = 1$  at maximum, and  $u(t)$  is the unit step. From here,  $s$   
 589 can be represented by the following two ordinary differential equations:

590 Eqn 4a. 
$$\frac{ds}{dt} = \frac{\left(\frac{\tau_2}{\tau_1}\right)^{\frac{\tau_1}{\tau_2 - \tau_1}} * x - s}{\tau_2}$$

591 Eqn 4b. 
$$\frac{dx}{dt} = -\frac{x}{\tau_1}$$

592 When a presynaptic spike is detected by a postsynaptic cell,  $x$  (spike inputs to that postsynaptic  
 593 cell) is increased by  $P$  – representing synaptic strength – which is then reduced by  $f_p$ , a fraction  
 594 of its value (67,76).

595 Eqn 5. 
$$x \rightarrow x + P$$

596 Eqn 6. 
$$P \rightarrow (1 - f_p)P$$

597 Recovery of P to 1 is defined by the time constant,  $\tau_p$ , where:

598 
$$\text{Eqn 7. } \frac{dP}{dt} = -\frac{(1-P)}{\tau_p}$$

599 PSC rise ( $\tau_1$ ) and decay ( $\tau_2$ ) kinetics were derived from experimental values (**Table S6**). Values  
600 used for  $f_p$  and  $\tau_p$  were the same as those in Nocon et al. (76). In total, PSCs were modeled as:

601 
$$\text{Eqn 8. } i_{syn}(V_m, t) = g_{syn} * s * (V_m - E_{syn}) * netcon$$

602 where  $g_{syn}$  is synaptic conductance,  $s$  is the time-dependent PSC defined above,  $E_{syn}$  is the  
603 reversal potential of the synaptic conductances, and  $netcon$  is a binary connectivity matrix in  
604 which rows represent sources and columns represent targets.

605 *Additional Network Noise*: An increase in network-level noise in response to suppression of PV  
606 cells has been directly demonstrated by multiple groups (5,79,80). After using our model to  
607 demonstrate PV cell hypoactivity in the male KI network, the basal network noise (3-4 Hz)  
608 delivered to PYR2 exclusively was increased by a factor of 1.5x (76). This increase in mean  
609 firing rate of PYR2 – representing an increase in network-noise in response to PV cell  
610 hypoactivity – has been used in previous models (76) and was set in order to match *in vivo*  
611 experimentally-derived changes in basal firing rates in response to PV suppression (5).

612

### 613 Analysis of Network Parameters

614 For each of the four networks and the three peak values of the applied current, analysis was  
615 performed on 15 independent simulations.

616 *Firing rate (FR)*: Firing rate was calculated as the average number of spikes per second (Hz)  
617 during the 2 s in which the sine wave stimulus of the applied current occurred.

618 *Transfer Entropy (TE)*: TE is a metric used in determining connectivity in complex networks,  
619 considered to describe the effective flow of information between neurons (81,82). To determine  
620 the dependency of the spike train of PYR2 or PV2 on the spike train of PYR1 more directly, we  
621 calculated the TE (83) using a MATLAB Toolbox (81).

622 *PYR1xPV2 Latency*: Custom scripts written in MATLAB were used to determine the PYR1xPV2  
623 latency. For each simulation, for each spike occurring in PYR1, the time (in ms) to the nearest  
624 spike in PV2 that followed the spike in PYR1 was calculated. The mean latency and latency  
625 standard deviation were calculated by averaging- or taking the standard deviation of,  
626 respectively, all latencies for a given simulation.

627

### 628 **Statistical Analysis**

629 All statistical analyses were completed in GraphPad Prism 8.0, and the threshold for  
630 significance for all tests was set to 0.05 ( $\alpha = 0.05$ ). Full statistical reports for all plots are  
631 available in the Statistical Supplement document. Briefly, all behavior and electrophysiology  
632 plots representing sex-pooled data (WT males and females as one group being compared to KI  
633 males and females together as a second group) were analyzed by t-tests, t-tests with Welch's  
634 correction, or Mann-Whitney tests. Moreover, all behavior and electrophysiology plots

635 representing sex-separated data were analyzed by Two-way ANOVA's with a Šídák's multiple  
636 comparisons test only executed when appropriate. Cumulative frequency plots were analyzed  
637 with a Kolmogorov-Smirnov (KS) test. Frequency-current (FI) curves were analyzed using  
638 Repeated Measure Two-way ANOVAs. PV cell density was analyzed using a Mann-Whitney  
639 test. MFISH data were analyzed by Mann-Whitney tests or Two-way ANOVAs with Šídák's  
640 multiple comparisons. Computational data were analyzed by Two-way ANOVAs with Šídák's  
641 multiple comparison tests (firing rate and latency plots) and by Repeated Measure Two-way  
642 ANOVAs (transfer entropy plots). For all statistical analyses relating to the computational model,  
643 any  $p < 0.05$  was denoted in the figure by a '#' sign – exact p-values can be found in the  
644 Statistical Supplement document. Figures were prepared using CorelDRAW Graphics Suite X8  
645 (Corel Corporation) and ImageJ (NIH). Data are presented as the mean  $\pm$  SEM, unless  
646 otherwise noted.

647

## 648 **RESULTS**

### 649 **A novel transgenic mouse line permits PV cell specific overexpression of complement** 650 **component 4.**

651 We generated a tunable conditional transgenic mouse based on a design by Dolatshad et al.  
652 (51) to reliably drive overexpression (OE) of *mC4* (mC4-OE) in specific cell types, and to  
653 incorporate genetic recombination switches that allow the conversion of different OE alleles for  
654 tunable transgene expression (**Fig. 1A**). Comer et al. (34) showed that mPFC neurons in  
655 postnatal day (P) 30 control mice express low levels of *C4b* transcript, which were not present in  
656 tissue from *C4b* knock-out mice (84).

657 To achieve specific OE of *mC4* in parvalbumin (PV)-positive cells (PV-mC4-OE) under the  
658 strong CAG promoter (85,86), we crossed PV-Cre mice with the conditional mC4-OE KI mouse  
659 line, mC4-KI mice (**Fig. 1A, B**). We generated litters that consisted of a mixture of pups that  
660 either inherited the floxed mC4-KI allele and thus overexpressed *mC4* specifically in PV cells  
661 (PV-mC4-KI, or KI) or did not inherit the floxed mC4-KI allele and were used as a wild type  
662 littermate control (PV-mC4-WT, or WT) (**Fig. 1B**). To control for effects of Cre-recombinase  
663 expression (87,88), we crossed homozygous PV-Cre mice to heterozygous mC4-KIs to obtain  
664 Cre recombinase expression in all offspring (**Fig. 1B**). We focused on a P40-60 temporal  
665 window, roughly equivalent to the young-adult life stage that immediately precedes SCZ  
666 symptom onset (89). PV-mC4-OE did not lead to observable health or locomotor deficits, as  
667 measured via weight (**Fig. 1C**) and distance traveled (**Fig. 1D**). Moreover, the density of PV  
668 cells was not significantly changed in PV-mC4-KI mice, compared to controls (**Fig. 1E-G**).

669 Next, we used multiplex fluorescence *in situ* hybridization (M-FISH) in the mPFC of WT and KI  
670 mice (**Fig. 1H-J**). At P21, we observed a significant increase in the number of *mC4* mRNA  
671 puncta in PV cells in PV-mC4-KI mice, indicating reliable mC4-OE in this interneuron type (**Fig.**  
672 **1I**). We did not observe an increase in *mC4* puncta in neighboring somatostatin (SST)-positive  
673 cells and non-PV- non-SST-expressing cells ("Other"), suggesting that our genetic approach led  
674 to specific mC4-OE in PV cells (**Fig. 1I**). In PV-mC4-KI mice, the number of *mC4* puncta in PV  
675 cells was not different between P21 and 65 (**Fig. 1I, J**), indicating that we achieved stable OE  
676 across development. Additionally, other cell types did not show differences in *mC4* expression  
677 compared to WT mice, indicating cell-type-specific maintenance of the OE into adulthood (**Fig.**  
678 **1I, J**). Finally, quantification of *Pv* mRNA puncta revealed that PV-mC4-OE did not drive any  
679 significant changes in the number of PV puncta per cell at either P21 (**Fig. 1K**) or P65 (**Fig. 1L**),  
680 suggesting that *Pv* expression was not altered by increased levels of *mC4* in this cell type.

681 In summary, we have developed and validated a novel conditional mouse model that, when  
682 combined with cre-driver lines, facilitates the study of distinct cellular sources of *mC4*  
683 overexpression. These results also indicate that we can reliably and specifically overexpress  
684 *mC4* in PV cells and that transgenic mice are devoid of gross motor or health defects.

685

### 686 **PV-specific mC4-OE causes an increase in anxiety-like behavior in male mice.**

687 Anxiety and mood disorders are highly prevalent in SCZ patients, manifesting during the early  
688 stages of the illness and prior to episodes of psychosis (90–93). To determine if PV-mC4-OE  
689 drives changes in anxiety-like behavior in P40–60 young adult mice, we used a behavioral  
690 battery, yielding a robust and reliable measure of behavior (60) (**Fig. 2A**). To assess arousal  
691 levels, we measured the time spent by mice in a field's anxiogenic regions, namely the open or  
692 lighted areas (**Fig. 2B**).

693 In the Elevated Zero Maze (EZM), we observed no differences in the amount of time spent in  
694 the open arms between groups, suggesting that mice with increased *mC4* expression in PV  
695 neurons did not display an overall change in anxiety-like behavior, relative to WT controls (**Fig.**  
696 **2C**). However, when we separated these data by sex, we observed a 46% reduction in the  
697 amount of time that KI males spent in the open arms, suggestive of a sexually dimorphic  
698 anxiety-like deficit (**Fig. 2D**). In contrast, we did not see such change in the behavior of KI  
699 female mice, relative to their WT controls (**Fig. 2D**). In the LDB, we observed a significant  
700 reduction in the time the PV-mC4-KIs spent in the light zone, again indicative of an increased  
701 anxiety-like response (**Fig. 2E**). Separation of the data by sex did not reveal the same sexual  
702 dimorphism as observed in the EZM (**Fig. 2F**). Lastly, in the novelty-suppressed feeding assay  
703 (NSF), we observed no change in the latency to feed between groups (**Fig. 2G**). Despite this,  
704 much like the EZM, there was a significant increase in anxiety-like behavior in the KI male mice,  
705 observed via a 91% increase in the latency to feed, but no such changes were observed in the  
706 PV-mC4-KI females (**Fig. 2H**). We performed the NSF in a safer environment, a mouse cage,  
707 where mice are exposed to bedding and can navigate close to the cage wall. In the Cage NSF,  
708 we did not observe differences in the latency to feed between groups (**Fig. S1**), suggesting that  
709 the NSF in the novel environment is anxiety-inducing and that the male KI mice, indeed, have  
710 increased anxiety-like behavior levels.

711 To describe the anxiety-like behavior of mice in response to PV-mC4-OE, we used a z-scoring  
712 approach that effectively tracks the performance of each mouse across all three behavioral  
713 assays, yielding a single score for each mouse, termed its Z-Anxiety score (60). We observed  
714 that the Z-Anxiety score of KI mice was increased in comparison to the control group (**Fig. 2I**).  
715 However, we discovered that overall heightened anxiety-like behavior is solely driven by a  
716 significant increase in the Z-Anxiety of PV-mC4-KI male mice (**Fig. 2J**). In support of this,  
717 female KI mice did not exhibit an increased Z-Anxiety score compared to the WT controls (**Fig.**  
718 **2J**). In summary, PV-mC4-OE causes sex-dependent behavioral changes, with male KI mice  
719 exhibiting increased anxiety-like behavior relative to WT controls.

720

### 721 **Increased levels of mC4 in PV cells disrupts active but not passive social behaviors.**

722 We employed a naturalistic, freely-moving interaction assay between experimental mice and a  
723 novel, juvenile, sex-matched CD-1 stimulus mouse to determine whether increased levels of  
724 *mC4* in fast-spiking cells led to social behavioral changes. (**Fig. 3**). First, both male and female  
725 KI mice spent a similar time interacting with a novel object as their WT counterparts (**Fig. 3A,**  
726 **B**), suggesting that PV-mC4-OE does not alter novelty-seeking behaviors or general motivation.

727 Immediately following the object interaction assay, the object was replaced with a stimulus  
728 mouse (**Fig. 3C**). Interactions between WT or KI mice and the stimulus mouse were divided into  
729 one of five sub-classes (**Fig. 3C**). Of all interaction sub-classes, experimental mice engaged in  
730 the active (active: experimental mouse initiating the interaction vs. passive: stimulus mouse  
731 initiating the interaction) snout-rear interaction (snout-ano-genital interactions) the most  
732 frequently, comprising half of all interaction time across all groups (**Fig. 3C, percentages**).  
733 Notably, PV-mC4-KI mice engaged less in active interactions than controls (**Fig. S2A**); this  
734 reduction was driven by a 24% decrease in active snout-rear interaction (**Fig. 3D**). These results  
735 indicate that increased levels of *mC4* in PV cells lead to a reduction in snout-ano-genital  
736 interactions. Unlike the dimorphic nature of the anxiety-like behavior, deficits in sociability  
737 affected KI mice of both sexes (**Fig. 3D**).

738 We observed more active than passive interactions by the experimental mice, which suggests  
739 that the experimental mice initiated more social interactions than the stimulus mice (**Fig. 3C**,  
740 **Fig. S2A**). Furthermore, we did not notice any changes in passive interactions, indicating that  
741 stimulus mice behaved similarly when interacting with both groups (**Fig. S2**). In the remaining  
742 interaction sub-classes, which were less frequent than the active snout-rear interaction, WT and  
743 KI mice interacted similarly with the stimulus mouse (**Fig. S2B-I**).

744 Computing a Z-Sociability score that accounts for all five interaction sub-classes did not reveal a  
745 broad deficit in sociability (**Fig. 3E**). Separately, in a three-chamber assay of sociability, a more  
746 restricted paradigm, PV-mC4-OE did not alter the social preference of PV-mC4-KIs, relative to  
747 WTs (**Fig. S3**), suggesting all experimental animals preferred to interact with a mouse rather  
748 than an object. Our results also suggest that the freely-moving interaction assay allowed us to  
749 capture the complex behavioral phenotype that OE mice exhibit.

750 Although female PV-mC4-KI mice did not exhibit changes in anxiety-like behavior, they had  
751 decreased social interactions as part of the KI group (**Fig. 3D**), indicating that the mechanisms  
752 driving the pathology in the anxiety-like and social behaviors in response to PV-mC4-OE likely  
753 function independently. Overall, these results suggest that increased levels of *mC4* in PV cells  
754 disrupt the circuits that underlie emotional and social behavior in mice.

755

### 756 **Sex-related differences in excitatory-inhibitory dynamics in mPFC PV cells with** 757 **increased levels of *mC4* in PV cells.**

758 To determine whether PV-mC4-OE changed the connectivity of circuits in the mPFC, we  
759 performed whole-cell voltage-clamp recordings in acute brain slices. Specifically, we first  
760 recorded miniature excitatory post-synaptic currents (mEPSCs) in PV neurons in layer (L) 2/3 of  
761 the mPFC in P40-60 mice (**Fig. 4A-G**), the same temporal window within which we identified  
762 behavioral deficits in response to PV-mC4-OE. Though we observed no change in PV cell  
763 mEPSC amplitude in PV-mC4-KI mice (**Fig. 4A-C**), we observed a 39% reduction in mEPSC  
764 frequency specifically in KI male mice (**Fig. 4D**). In contrast, there were no changes in PV cell  
765 mEPSC frequency in the KI females (**Fig. 4D**). In support of this, there was a rightward shift in  
766 the frequency distribution of inter-event-intervals (IEIs) in PV neurons in PV-mC4-KI males, but  
767 not females (**Fig. 4E**), suggesting that PV-mC4-OE leads to a decrease in excitatory drive to  
768 this fast-spiking neuron. Finally, PV-mC4-OE did not alter the Rise<sub>10-90</sub> or Decay<sub>tau</sub> of mEPSCs  
769 recorded in PV cells (**Fig. 4F, G**), suggesting that increased levels of *mC4* did not alter the  
770 kinetics of the PV cell postsynaptic response.

771 To determine if PV-mC4-OE impacted the inhibitory drive to PV neurons, we recorded miniature  
772 inhibitory post-synaptic currents (mIPSCs) in this inhibitory cell type (**Fig. 4H-N**). Using a high-



773 chloride internal recording solution with a chloride reversal potential of -13 mV yielded inward  
774 mIPSCs when recording at -70 mV (**Fig. 4H**). The recordings revealed that PV-mC4-OE drove a  
775 16% increase in the amplitude of PV cell mIPSCs (**Fig. 4I**) and a rightward shift in the  
776 distribution of mIPSC amplitudes (**Fig. 4J**) specifically in male, but not female mice, suggesting  
777 that inhibitory inputs are increased in PV cells in male PV-mC4-KI mice. Additionally, we  
778 observed no changes in mIPSC frequency (**Fig. 4K, L**), Rise<sub>10-90</sub> (**Fig. 4M**), or Decay<sub>tau</sub> (**Fig. 4N**)  
779 between groups.

780 Taken together, these results suggest that PV-mC4-OE drives sex-dependent alterations in PV  
781 cell excitatory and inhibitory connections, mirroring the sexually dimorphic changes in anxiety-  
782 like behavior. The combined effects of reduced excitation and increased inhibition to PV cells in  
783 KI male mice suggests hypoactivity of mPFC inhibitory circuits in response to increased levels  
784 of *mC4* in fast-spiking cells.

785

### 786 **PV-specific mC4-OE leads to opposing changes in the excitability of PV cells in male and** 787 **female mice.**

788 We evaluated the passive and active properties of both mPFC L2/3 PV cells (**Fig. 5A-E**, **Tables**  
789 **S1, S2**) and PYRs (**Fig. 5F-J**, **Tables S3, S4**). To accomplish this, we injected steps of  
790 hyperpolarizing and depolarizing current pulses and recorded the membrane voltage ( $V_m$ )  
791 changes. Changes in excitability of PV neurons in male and female mice in response to PV-  
792 mC4-OE diverged: while there was a significant decrease in PV cell spike frequency in KI male  
793 mice relative to WT males (**Fig. 5A, B**), we observed a significant increase in the spike  
794 frequency of PV cells in female OE mice, compared to WT females (**Fig. 5A, C**). This increase  
795 in excitability in PV cells in KI females was also accompanied by a 26% reduction in their  
796 rheobase, another indication of increased excitability (**Fig. 5D**). Finally, we observed a  
797 significant shift towards a more depolarized resting membrane voltage in KI mice overall (**Fig.**  
798 **5E**, **Tables S1, S2**). These results suggest that there is a sex-dependent divergence in the fast-  
799 spiking cell's excitability with higher *mC4* levels in PV cells.

800 Though mC4-OE is limited to PV cells in this mouse model, it is possible that disruption in the  
801 activity of PV cells may elicit compensatory changes in PYRs. To this end, we recorded the  
802 membrane voltage response as before, now in mPFC L2/3 PYRs (**Fig. 5F-J**). Similar to PV  
803 neurons, in male mice PV-mC4-OE drove a reduction in the spike frequency of PYRs (**Fig. 5F,**  
804 **G**). Unlike PV cells, we observed no changes in spike frequency in the PYRs of KI female mice  
805 (**Fig. 5F, H**). Moreover, PV-mC4-OE did not alter the rheobase (**Fig. 5I**) or resting membrane  
806 voltage (**Fig. 5J**) of PYRs. These results indicate that PV-mC4-OE induced changes in PYR  
807 excitability in male mice.

808 Overall, increased *mC4* levels in PV cells caused sexually dimorphic effects on the excitability of  
809 cortical cells. Fast-spiking cells and PYRs in males showed a decrease in excitability, while fast-  
810 spiking cells in females exhibited hyperexcitability. This divergent outcome suggests that the  
811 male and female mouse brain respond to complement dysfunction in opposing ways.

812

### 813 **PV-specific mC4-OE alters the kinetics of mEPSCs in PYRs of female mice.**

814 We recorded mEPSCs (**Fig. S4A-E**) and mIPSCs (**Fig. S4F-J**) in L2/3 mPFC PYRs. PV-mC4-  
815 OE did not lead to changes in PYR mEPSC amplitude (**Fig. S4B**) or frequency (**Fig. S4C**)  
816 compared to controls. While the Rise<sub>10-90</sub> of the mEPSCs in PYRs was also not altered in PV-  
817 mC4-KI mice (**Fig. S4D**), PV-mC4-OE caused a 14% reduction in Decay<sub>tau</sub> of the mEPSCs in KI

818 female, but not KI male mice (**Fig. S4E**), suggesting a change in receptor subunit composition in  
819 PYRs (94) or a change in the location of excitatory synapses along its somatodendritic axis  
820 (95,96). Finally, PV-mC4-OE did not induce changes in PYR mIPSC amplitude (**Fig. S4G**),  
821 frequency (**Fig. S4H**), or kinetics (**Fig. S4I, J**) relative to controls. These results suggest that  
822 PV-mC4-OE largely does not alter mPFC PYR synaptic drive.

823

#### 824 **No changes in anxiety-like behavior with pan-neuronal overexpression of *mC4*.**

825 Next, we crossed the mC4-KI mouse to the BAF53b-Cre transgenic mouse line (50) that  
826 express Cre recombinase under the control of the mouse *Act16b* gene promoter to drive mC4-  
827 OE in all neurons (PanN-mC4-OE). The expression of the BAF53b gene in neurons can first be  
828 detected during embryonic day 12.5 in the brain and spinal cord (97). Using a similar breeding  
829 strategy as with the PV-mC4-KI mice, litters consisted of a mix of mice that inherited the floxed  
830 mC4-KI allele and thus overexpressed *mC4* in all neurons (PanN-mC4-KI), or littermates that  
831 did not inherit the floxed mC4-KI allele, and thus were effectively WT (PanN-mC4-WT) (**Fig. 6A**,  
832 *top*).

833 We employed the same assays – the EZM, LDB, and NSF – to test anxiety-like behavior in P40-  
834 60 PanN-mC4-WT and PanN-mC4-KI mice (**Fig. 6A, bottom**). First, OE of *mC4* in all neurons  
835 did not alter the distance traveled compared to controls (**Fig. 6B, C**), suggesting that PanN-  
836 mC4-KI mice exhibited intact locomotion. Moreover, compared to controls, we did not observe  
837 any deficit in anxiety-like behavior in PanN-mC4-KI mice in the EZM (**Fig. 6D, E**), LDB (**Fig. 6F**,  
838 **G**), or NSF (**Fig. 6H, I**). Also, we did not observe any increase in Z-Anxiety in PanN-mC4-KI  
839 mice (**Fig. 6J**), nor in either sex specifically (**Fig. 6K**). Taken together, PanN-mC4-OE does not  
840 drive anxiety-like behavior in mice.

841 We have demonstrated that increased levels of *mC4* in PV neurons resulted in a strong, sex-  
842 specific anxiety-like phenotype not observed in pan-neuronal *mC4* overexpressors. This  
843 suggests that specific complement changes in PV cells leads to developmental dysfunction of  
844 inhibitory circuits that is more detrimental to brain function than pan-neuronal alterations.

845

#### 846 **Disrupted neural communication and hyperexcitability in a network model of male mice** 847 **with increased levels of *mC4* in PV cells.**

848 We used a computational model to determine how PV-mC4-driven deficits in connectivity and  
849 excitability of PYR and PV cells contribute to circuit-level abnormalities in a simulated network.  
850 Utilizing the DynaSim toolbox (62), we developed four networks with identical architecture (**Fig.**  
851 **7A**) representing the experimental conditions – WT and KI male, and WT and KI female groups.  
852 The electrophysiological properties of individual PYR and PV cells – and their connectivity to  
853 one another – were matched to the experimental data (**Tables S5, S6**). Specifically, we first  
854 established unique models of PV and PYR units for each group using our experimental data  
855 (**Table S5**). To determine if these model units accurately reflected the experimental data, we  
856 compared the frequency vs. current (FI) curves of each model unit against its equivalent  
857 experimental cell (**Fig. S5**). In all cases, these model units accurately approximated their  
858 experimental counterpart.

859 We hypothesized that downstream PYR in KI males would become hyperactive as a function of  
860 reduced inhibition. In support of this, in the output layer of the male KI neural network model we  
861 observed a significant decrease in the firing rate (FR) of PV2 (**Fig. 7B**) and a significant

862 increase in PYR2 FR (**Fig. 7C**) at all three peak values of the applied current ( $I_{app}$ ), compared to  
863 the male WT network. This suggests that in the network model, increased levels of *mC4* in male  
864 PV model cells cause decreased activity of this fast-spiking model neuron, driving hyperactivity  
865 of PYR model cells.

866 To determine if the changes associated with PV-mC4-OE disrupt neuronal communication, we  
867 measured the transfer entropy (TE) of the direct PYR1->PV2 (**Fig. S6A-C**) and PYR1->PYR2  
868 (**Fig. 7D, E**) connections. Specifically, we first investigated the likelihood that a spike in PYR1  
869 would cause a spike in PV2 (**Fig. S6B, C**). In line with our hypothesis, we observed a significant  
870 reduction in the PYR1->PV2 TE in the male KI network at lag times of 1-3 ms at all peak values  
871 of  $I_{app}$  (**Fig. S6B**). This suggests that the effective transfer of information from PYR1 to PV2 is  
872 disrupted in the male KI network. This finding was further supported by a significant increase in  
873 both the average (**Fig. S6D**) and standard deviation (**Fig. S6E**) of the latency from any given  
874 PYR1 spike to the nearest following spike observed in PV2. Consistent with this compromised  
875 PYR1->PV2 communication, because PV2 is the only line of inhibition to PYR2 in the network,  
876 the PYR1->PYR2 TE is also significantly altered in the male KI network (**Fig. 7D**). Namely, we  
877 observed a broadening of the lag times over which activity in PYR1 could drive changes in  
878 PYR2 activity (**Fig. 7D**), indicating that the precise temporal relationship of PYR1->PYR2  
879 communication is disrupted in the model male KI network compared to controls.

880 In KI female mice, we observed a significant increase in the intrinsic excitability of PV cells in  
881 response to PV-mC4-OE (**Fig. 5**). Interestingly, we observed no changes in the PV2 FR in the  
882 female KI network in either the 200 or 275 pA peak  $I_{app}$ , compared to the female controls (**Fig.**  
883 **7B, left, middle**). However, when the peak of  $I_{app}$  was raised to 350 pA, we observed a  
884 significant 9% increase in the FR of PV2 in the female KI network (**Fig. 7B, right**), suggesting  
885 that at lower peak applied current values, the increase in intrinsic excitability of PV cells in the  
886 female KI network – and the potential increase in PV2 FR that may be expected in response to  
887 input from PYR1 – is neutralized by the increased spiking activity of PV1 (and thus PV1  
888 inhibition to PV2). However, our results suggest that when we applied stronger stimulation, the  
889 intrinsic excitability of PV2 and its resulting increase in FR outweighs the influence of increased  
890 inhibition.

891 Notably, in the female KI network, despite observing no change in PV2 FR at peak  $I_{app}$  values of  
892 200 and 275 pA, the FR of PYR2 is still significantly decreased compared to controls. Provided  
893 that PV2 is the only source of inhibition to PYR2, this finding of a lack of change in PV2 FR but  
894 a decrease in FR of PYR2 appears incongruous. To determine if it is changes not in the number  
895 of spikes, but in the timing of spikes of PV2 relative to PYR2 that may be driving this decrease  
896 in PYR2 FR in the female KI network, we compared the PYR1->PV2 TE in the female WT and  
897 KI networks (**Fig. S6C**). At shorter lag times, we observed a significant increase of  
898 approximately 100% in the PYR1->PV2 TE of the female KI network relative to its control for all  
899 peak  $I_{app}$  values (**Fig. S6C**).

900 This increase in TE resulted in a significant reduction in both the mean (**Fig. S6D**) and standard  
901 deviation (**Fig. S6E**) of the PYR1xPV2 latency in the female KI network compared to controls,  
902 suggesting that the sculpting of the PV2 firing pattern is more precise and consistent in the  
903 female KI network than in the female WT network. The net effect of this result is a firing pattern  
904 of PV2 that is more effective in suppressing the excitation reaching PYR2 (**Fig. S6F**).

905 In the female KI network, low intensity  $I_{app}$  did not alter PYR1->PYR2 TE relative to controls,  
906 suggesting intact PYR model cell communication (**Fig. 7E**). However, at a higher  $I_{app}$ , we  
907 observed significant changes in the PYR1->PYR2 TE (**Fig. 7E, right**), suggesting that neural  
908 communication in the female KI network is slightly altered with stronger stimulation compared to  
909 controls. These results also suggest that female PYR model cells are more resilient to inhibitory  
910 circuit perturbations than male networks.

911 In total, our results demonstrate that changes in intrinsic properties and synaptic connectivity  
912 associated with PV-mC4-OE decrease synaptic fidelity between model PYR and PV cells and  
913 cause hyperexcitability in a network model of male mice with increased levels of *mC4* in PV  
914 cells.

915

## 916 **DISCUSSION**

917 Using a new model to conditionally overexpress *mC4*, we have discovered that mPFC PV cells  
918 in male mice are susceptible to complement dysfunction. Additionally, we have established a  
919 connection between the *mC4*-driven alterations in the circuitry of the mPFC and pathological  
920 anxiety-like behavior in male mice. Increased levels of *mC4* in PV neurons also disrupted both  
921 excitatory and inhibitory inputs to fast-spiking cells in male but not female mice. Furthermore,  
922 we have demonstrated that specific OE of *mC4* in PV cells led to opposing effects on the  
923 excitability of cortical cells. While mC4-OE in PV cells drove a decrease in the excitability of  
924 both male fast-spiking cells and PYRs, it led to hyperexcitability of female PV cells. By utilizing a  
925 Cre-driver line to induce mC4-OE in all neurons, we also observed that specific *mC4*  
926 dysfunction in PV cells has a greater adverse effect on anxiety-like behavior than widespread  
927 neuronal complement alterations. Using a simple computational model, we demonstrated that  
928 PV-mC4-driven inhibitory microcircuit deficits in the male model network led to disrupted neural  
929 communication between PYR model cells and hyperexcitability. Overall, these results establish  
930 a causative link between the SCZ-associated gene *C4* and the vulnerability of fast-spiking cells,  
931 which are crucial for the function of the mPFC.

932

### 933 **Synaptic alterations in fast-spiking cells with PV-specific *mC4* overexpression**

934 Here, we demonstrate that in male mice, conditionally targeting mC4-OE to PV cells leads to a  
935 drastic loss of excitatory drive on this inhibitory cell type that is accompanied by increased  
936 inhibition. Several lines of evidence point to synaptic dysfunction and pathological excitatory  
937 synaptic loss as prominent features of SCZ (22,98–100). In support of this, our group and others  
938 previously demonstrated that increased levels of *C4* in developing L2/3 mPFC PYRs is sufficient  
939 to cause a significant loss of excitatory synapses, leading to mPFC circuit dysfunction (34,101).  
940 Our results reveal a significant decrease in the frequency of mEPSCs on PV cells without  
941 alterations in their amplitude. Although the underlying mechanism is not clear, our results  
942 suggest that the decline in excitatory drive to fast-spiking cells is either a reduction in the  
943 probability of presynaptic release or synapse number. In conjunction with previous results  
944 (34,101), this suggests that synapse loss is the most likely mechanism of hypoconnectivity in  
945 fast-spiking neurons.

946 While it is yet to be established whether pathological dysfunction in SCZ is confined to specific  
947 microcircuitry, a study conducted in SCZ post-mortem tissue demonstrated that there is a



948 decrease of excitatory synapses on PFC PV cells relative to control subjects (22). In support of  
949 this, dysregulated ErbB4, a receptor of the SCZ-linked protein neuregulin-1, may contribute to  
950 lower activity of PV cells by reducing their excitatory inputs (102). A decrease in the excitatory  
951 drive to fast-spiking interneurons has also been observed in mouse models of AD (103,104) and  
952 neurodevelopmental disorders (105–107), suggesting that dysfunction in feed-forward excitatory  
953 synapses to fast-spiking cells is a common denominator in brain pathology.

954 A long-standing hypothesis is that defects in the GABAergic inhibitory system can contribute to  
955 SCZ (108). Additionally, cognitive impairment in SCZ could be the result of dysfunction in the  
956 convergence of glutamatergic and GABAergic systems (109). One possible outcome of  
957 decreased excitation on PV cells in the male PV-mC4-KI mouse is a disruption in the dynamics  
958 of excitation and inhibition, tipping the scales towards the side of unchecked excitation and  
959 excess glutamatergic release. This also aligns well with the NMDA-hypofunction SCZ model  
960 (110–112), where the loss of NMDA receptors, specifically on interneurons, results in  
961 hypoactivity of PV neurons. Alterations in inhibitory circuitry could also alter the timing of  
962 excitation and inhibition (113) that controls oscillatory activity and information flow (10).

963 We observed a significant increase in the amplitude of mIPSCs in PV cells in PV-mC4-KI male,  
964 but not female mice, suggesting an enhancement of inhibitory inputs to fast-spiking cells.  
965 Naturally, this effect would amplify the putative decrease in PV cell activity in the male PV-mC4-  
966 KI mice, already caused by the reduction in the excitatory drive to this interneuron. As increased  
967 inhibition of PV cells is counterintuitive to the effects that increased complement activity would  
968 have on inhibitory synapses or a compensatory change to enhance the drive of fast-spiking  
969 cells, we can only conclude that these are *mC4*-driven maladaptive changes in the male brain.  
970 Whether this increase in mIPSC amplitude is driven by presynaptic changes in quantal size or  
971 postsynaptic changes in GABA receptor subunit composition or sensitivity is unknown and will  
972 require deeper investigation.

973 Microglia-dependent synaptic engulfment is an established mechanism for complement-driven  
974 synaptic loss in the normal and diseased brain (49,114–116). Studies using mice that lack  
975 specific complement genes have shown that these immune molecules contribute to synaptic  
976 plasticity (117–119). In fact, complement upregulation has been observed in several  
977 neurodegenerative diseases where synaptic loss is a prominent feature (120–122). A recent  
978 study also showed that C1q, the initiating member of the classic complement pathway, binds  
979 neuronal activity-regulated pentraxin (Nptx2) (123), an immediate early gene highly enriched at  
980 excitatory synapses on PV cells, where we observed the most drastic phenotype. Furthermore,  
981 deletion of Nptx2 caused increased activation of the classical complement pathway and  
982 microglia-mediated elimination of excitatory synapses on PV cells (123), supporting this  
983 established mechanism of synaptic loss in excitatory inputs on PV neurons. Still, other non-glia  
984 mechanisms could underlie excitatory synaptic loss in interneurons. In support of this, our group  
985 (124) used STED imaging in mPFC slices (125) to demonstrate that increased levels of *mC4*  
986 accelerate the accumulation of the postsynaptic receptor GluR1 in neuronal LAMP1-positive  
987 lysosomes, leading to pathological synaptic loss.

988

## 989 **The mPFC and neuropsychiatric disorders**

990 The lifetime prevalence of anxiety disorders is close to 30% (126) and it is highly comorbid with  
991 other neuropsychiatric disorders, including SCZ (90,127,128). Our approach of conditionally



992 targeting *mC4* in fast-spiking cells provides a unique example that establishes a causal relation  
993 between elevated levels of the SCZ-associated gene *C4* in these cells and enhanced anxiety-  
994 like behavior and mPFC circuit dysfunction in male mice, shedding light on the intricate  
995 dynamics of neuropsychiatric disorders.

996 We have focused on the mPFC to establish a connection between altered circuitry and  
997 disrupted emotional behavior. Genetic insults and chronic stress have lasting effects on the PFC  
998 that lead to alterations in cognitive and social function (129–132). In the mouse mPFC, inhibitory  
999 neurons respond to a variety of social and emotional stimuli (59,133). Additionally, PV cells  
1000 coordinate and enhance the neuronal activity of PFC projection neurons to drive fear expression  
1001 in the mouse (134). Consistent with its function in regulating emotional behavior, we observed  
1002 that increased levels of *mC4* in PV neurons lead to synaptic alterations in fast-spiking cells and  
1003 opposing effects in the excitability of cortical cells in male and female mice.

1004 The PFC is plays a crucial role in social cognition, enabling us to understand and interpret the  
1005 actions of others, which is fundamental for effective social interaction (135,136). Here we show  
1006 that while increased levels of *mC4* in PV cells did not cause a drastic deficit in social behavior,  
1007 overexpressing mice exhibited deficits in subclasses of exploratory social behavior, linking  
1008 defects in inhibitory circuits to the initiation of social behaviors. In support of the role of mPFC  
1009 PV neurons in the regulation of social behavior, Bicks et al. (137) demonstrated that PV cell  
1010 activity in the mPFC preceded an active social episode, or an episode initiated by the  
1011 experimental mouse. Similarly, we showed that increased levels of *mC4* in PV cells lead to  
1012 deficits in active but not passive social interactions. Finally, in contrast to the deficits in anxiety-  
1013 like behavior, *mC4*-driven social deficits were not sexually dimorphic, suggesting that in mice  
1014 social deficits might have a distinct etiology from pathological anxiety-like behavior.

1015

## 1016 **Complement dysfunction and the mPFC**

1017 Although there is a strong link between immune dysfunction and neuropsychiatric disorders  
1018 (49,138–143), more research is needed to establish a connection between complement  
1019 dysfunction and specific circuitry underlying emotional behavior. Disruption of *Csmd1*, which is a  
1020 *C4* inhibitor, induces behaviors reminiscent of blunted emotional responses, anxiety, and  
1021 depression (144). Additionally, Crider et al. (145) found a significant increase in *C3* expression,  
1022 a downstream effector of *C4*, in the PFC of depressed suicide subjects. Together with previous  
1023 results (34,101), we showed that *mC4* alterations in specific cell-types are linked to mPFC-  
1024 related pathologies. In summary, these results suggest that the PFC is a brain region  
1025 susceptible to pathological complement activity.

1026

## 1027 **Increased levels of *mC4* in PV neurons, cortical function, and sex-related pathologies**

1028 Using a new mouse model, we show that targeted OE of *mC4* specifically in fast-spiking cells  
1029 induces pathological anxiety-like behavior in male mice while sparing females. In the male  
1030 mPFC, this sex-specific behavioral change correlates with a decrease in excitatory synaptic  
1031 inputs to fast-spiking neurons, coupled with an increase in their inhibitory synapses, potentially  
1032 resulting in reduced activity of this interneuron. During development, the maturation of fast-  
1033 spiking cells contributes to the wiring of the neural networks, controlling the critical window of

1034 plasticity (146–149). Therefore, alterations in the developmental plasticity windows driven by  
1035 increased levels of *mC4* in PV cells may cause the synaptic and excitability deficits we observed  
1036 in the mPFC. There are also sex-dependent differences in the developmental cortical  
1037 mechanisms of plasticity (150), which are regulated, in part, by PV cell activity, including their  
1038 feed-forward circuits (147,148). Therefore, increased levels of *mC4* in fast-spiking cells could  
1039 alter the function of the mPFC through distinct mechanisms in males and females, explaining  
1040 the sex-divergent outcomes.

1041

#### 1042 **Alterations in temporal fidelity and neural communication in SCZ and other** 1043 **neuropsychiatric disease**

1044 Using simulations, we showed a significant decrease in the firing rate of PV model cells and  
1045 hyperactivity of PYR model cells in the male KI network compared to the male WT network.  
1046 More critically, we also showed a significant broadening of the lag times over which activity in  
1047 the presynaptic PYR influences the postsynaptic PYR, a product of defunct inhibition. This  
1048 deficit in inhibition was evident in the drastic reduction of firing rates of PV2 in the male KI  
1049 network and was bolstered by a reduction in the PYR1->PV2 transfer entropy compared to that  
1050 of the male WT network.

1051 During development, neuronal networks are far from static; an ever-dynamic landscape,  
1052 synaptic connections are constantly being formed, lost, strengthened, or weakened across  
1053 development (151–153). The fundamental unit of this plasticity is the information transferred  
1054 from the presynaptic partner to its postsynaptic partner(s), the efficacy or existence of this  
1055 connection being largely an activity-dependent factor (152,154). Moreover, disruptions in spike-  
1056 timing and consequential deficits in synaptic plasticity are core features of neuropsychiatric  
1057 diseases, including SCZ (29,83,155–157).

1058 Thus, the specific finding of increased transfer entropy across a broader lag-time window in the  
1059 male KI network is of particular importance because it suggests a major disruption in the  
1060 temporal precision of effective information flow. In support of this, disruption of SCZ-associated  
1061 risk genes that specifically contribute to spike-timing and plasticity in animal models have been  
1062 shown to evoke a broad spectrum of SCZ-associated behavioral and synaptic deficits (158–  
1063 161).

1064 In the case of the female WT and KI networks, a seemingly-incompatible result emerged  
1065 whereby, despite a lack of change in PV2 firing rate, the firing rate of PYR2 was reduced in the  
1066 KI female condition. However, we observed a significant increase in the PYR1->PV2 transfer  
1067 entropy in the female KI network that, despite not resulting in a change in the overall number of  
1068 spikes evoked in PV2, shaped the temporal sequence of when those spikes of PV2 occurred  
1069 more precisely. As a result, the effective inhibition experienced by PYR2 aligned more strongly  
1070 with the excitation to PYR2 (from PYR1) in time, leading to an overall decrease in PYR2 firing  
1071 rate.

1072 Relevant to several broader hypotheses of SCZ is the convergence of altered neural  
1073 communication and temporal fidelity. Using the specific experimental changes in intrinsic  
1074 excitability and synaptic connectivity associated with PV-*mC4*-OE to guide our computational  
1075 model, we too were led to exactly this same point of convergence. From the decades-enduring  
1076 synaptic hypothesis of SCZ first proposed by Irwin Feinberg (98) to modern hypotheses of

1077 NMDAR hypofunction (111,156,162), many of the dominating views of SCZ pathogenesis  
1078 feature disruptions in spike-timing and resultant deficits in the effective flow of information from  
1079 one neuron to the next. Moreover, computational models of brain dysfunction relevant to SCZ  
1080 from other groups consistently converge on this same feature (156).

1081 Separately, Murray et al (163) implemented synaptic disinhibition – similar to our model of PV  
1082 hypofunction – in a local-circuit PFC network model and found that this manipulation caused an  
1083 increase in PYR firing rate (as in our model), broadened network activity, and decreased  
1084 memory precision. Overall, our simulation provides evidence that a genetic alteration in fast-  
1085 spiking cells leads to unique sex-dependent phenotypes in a model network, highlighting how  
1086 cellular and synaptic phenotypes interact to produce complex neural network deficits in  
1087 diseased states.

1088

### 1089 **Weaknesses of this study**

1090 We used a unique genetic approach to increase levels of *mC4* in PV cells globally. However,  
1091 besides the PFC, we did not include recordings in other brain regions related to emotional  
1092 regulation. Alterations in the inhibitory microcircuitry of other anxiety-related areas may underlie  
1093 the behavioral effects that we have captured (164,165). Nevertheless, our findings demonstrate  
1094 that conditional overexpression of *mC4* in fast-spiking cells results in synaptic and excitability  
1095 deficits that are consistent with the role of mPFC PV cells in regulating emotional behavior.

1096 SCZ is a complex disorder and it's likely that multiple genetic and non-genetic factors contribute  
1097 to its pathogenesis, each potentially impacting synaptic function and the excitability of cortical  
1098 cells in different but converging ways. In light of this caveat, we provide a new mouse model  
1099 where complement dysfunction in PV cells causes cellular and behavioral dysfunction  
1100 reminiscent of PFC-associated neurological conditions.

1101 While we used a computational model to better understand how the experimental results we  
1102 gathered may cause network-level deficits in an intact system, our model has several  
1103 limitations. First, the model has a simple architecture with strictly feed-forward connections.  
1104 Thus, our ability to capture complex network interactions was limited. Moreover, the model was  
1105 composed of only four interconnected model neuron units, a drastic simplification of the rich  
1106 connectivity profiles of these cells in the intact rodent brain. Finally, the weights for all synaptic  
1107 connections were altered in accordance with relative changes observed in the experimental  
1108 mPSC data recorded in PYRs and PV cells in acute brain slices. However, these changes might  
1109 not reflect *in vivo* properties. Nevertheless, despite these simplifications and limitations, our  
1110 simulation of a network with increased levels of *mC4* in male fast-spiking cells is consistent with  
1111 previous models of disrupted neuronal communication and prefrontal circuit dysfunction in  
1112 schizophrenia (83).

1113

### 1114 **Concluding Remarks**

1115 Here, we have generated a unique mouse model to overexpress *C4* conditionally. Diseases  
1116 linked to increased *C4* levels often have autoimmune or inflammatory aspects. Therefore, this  
1117 mouse can be used to target specific cell types and tissues to determine the role of this  
1118 important gene in various diseases outside of the nervous system or test the efficacy of

1119 pharmacology to target complement-related diseases. Together with previous studies, we have  
1120 established *C4* as an important regulator of pathological synaptic loss in the prefrontal cortex, a  
1121 region associated with several neuropsychiatric disorders. Furthermore, by conditionally  
1122 overexpressing *C4* in fast-spiking cells, we have identified a connection between dysfunction of  
1123 inhibitory circuits in the prefrontal cortex and pathological anxiety-like behavior in male mice.

1124

#### 1125 **ACKNOWLEDGEMENTS**

1126 We would like to thank Dr. Todd Blute and the Boston University Biology Imaging Core for  
1127 providing support for the confocal microscope. We thank members of the Cruz-Martín lab for  
1128 critical reading of the manuscript and helpful discussions. This work was supported by a  
1129 National Institutes of Health R01 (NIMH, 5R01MH129732-02) and an industry grant (to generate  
1130 mC4-KI mouse, Biogen, #55206943) to A.C-M., a Brenton R. Lutz Award to R.A.P, a  
1131 SURF/NSF-REU program (NSF, REU grant IOS-1659605) to J.R.G and N.M.P.L., and an NSF  
1132 Award #2319321 to K.S.

1133

#### 1134 **AUTHOR CONTRIBUTIONS**

1135 L.A.F. and A.C-M. conceptualized experiments including formulating composition, goals, and  
1136 scope of the paper and approaches for analyses. L.A.F., R.A.P., M.S., A.B., S.B., J.R.G and  
1137 N.M.P.L. collected the data and performed experiments. L.A.F. and R.A.P. performed data  
1138 curation. L.A.F., R.A.P., A.B., M.S., and A.C.M analyzed data. L.A.F. and R.A.P. contributed  
1139 code for data analysis. L.A.F. and A.C-M. contributed to parts of the original draft, including  
1140 figure design and generation. L.A.F. developed the computational model with the support of  
1141 J.C.N. and K.S. All authors contributed to revision and editing of the draft. A.C-M. obtained  
1142 funding and supervised the project providing mentorship, oversight, and project administration.

1143

#### 1144 **COMPETING INTERESTS**

1145 The authors declare that they have no competing interests.

1146

#### 1147 **DECLARATION OF GENERATIVE AI AND AI-ASSISTED TECHNOLOGIES**

1148 The authors declare that no AI or AI-assisted technologies were used in the writing process.

1149

#### 1150 **DATA AVAILABILITY**

1151 Data are available at <https://osf.io/je38k/>

1152

#### 1153 **CODE AVAILABILITY**

1154 Custom-written routines are available at <https://github.com/CruzMartinLab>

1155

## 1156 **REFERENCES**

- 1157 1. Ferguson BR, Gao WJ. PV Interneurons: Critical Regulators of E/I Balance for Prefrontal  
1158 Cortex-Dependent Behavior and Psychiatric Disorders. *Front Neural Circuits* [Internet].  
1159 2018 [cited 2021 Feb 21];12. Available from:  
1160 <https://www.frontiersin.org/articles/10.3389/fncir.2018.00037/full>
- 1161 2. Hu H, Gan J, Jonas P. Fast-spiking, parvalbumin+ GABAergic interneurons: From cellular  
1162 design to microcircuit function. *Science*. 2014 Aug;345(6196):1255–263.
- 1163 3. Rudy B, Fishell G, Lee S, Hjerling-Leffler J. Three Groups of Interneurons Account for  
1164 Nearly 100% of Neocortical GABAergic Neurons. *Dev Neurobiol*. 2011 Jan 1;71(1):45–61.
- 1165 4. Cardin JA. Inhibitory interneurons regulate temporal precision and correlations in cortical  
1166 circuits. *Trends Neurosci*. 2018 Oct;41(10):689–700.
- 1167 5. Nocon JC, Gritton HJ, James NM, Mount RA, Qu Z, Han X, et al. Parvalbumin neurons  
1168 enhance temporal coding and reduce cortical noise in complex auditory scenes. *Commun*  
1169 *Biol*. 2023 Jul 19;6(1):1–14.
- 1170 6. Massi L, Lagler M, Hartwich K, Borhegyi Z, Somogyi P, Klausberger T. Temporal  
1171 Dynamics of Parvalbumin-Expressing Axo-axonic and Basket Cells in the Rat Medial  
1172 Prefrontal Cortex In Vivo. *J Neurosci*. 2012 Nov 14;32(46):16496–502.
- 1173 7. Wilentz WB, Contreras D. Dynamics of excitation and inhibition underlying stimulus  
1174 selectivity in rat somatosensory cortex. *Nat Neurosci*. 2005 Oct;8(10):1364–70.
- 1175 8. Jelítai M, Puggioni P, Ishikawa T, Rinaldi A, Duguid I. Dendritic excitation–inhibition  
1176 balance shapes cerebellar output during motor behaviour. *Nat Commun*. 2016 Dec  
1177 15;7(1):13722.
- 1178 9. Lam NH, Borduqui T, Hallak J, Roque A, Anticevic A, Krystal JH, et al. Effects of Altered  
1179 Excitation-Inhibition Balance on Decision Making in a Cortical Circuit Model. *J Neurosci*.  
1180 2022 Feb 9;42(6):1035–53.
- 1181 10. Buzsáki G, Wang XJ. Mechanisms of Gamma Oscillations. *Annu Rev Neurosci*.  
1182 2012;35:203–25.
- 1183 11. Howard MW, Rizzuto DS, Caplan JB, Madsen JR, Lisman J, Aschenbrenner-Scheibe R, et  
1184 al. Gamma Oscillations Correlate with Working Memory Load in Humans. *Cereb Cortex*.  
1185 2003 Dec 1;13(12):1369–74.
- 1186 12. Guan A, Wang S, Huang A, Qiu C, Li Y, Li X, et al. The role of gamma oscillations in  
1187 central nervous system diseases: Mechanism and treatment. *Front Cell Neurosci* [Internet].  
1188 2022 [cited 2023 Dec 13];16. Available from:  
1189 <https://www.frontiersin.org/articles/10.3389/fncel.2022.962957>



- 1190 13. Sohal VS, Zhang F, Yizhar O, Deisseroth K. Parvalbumin neurons and gamma rhythms  
1191 enhance cortical circuit performance. *Nature*. 2009 Jun;459(7247):698–702.
- 1192 14. Kim KM, Bong SH, Byeon J, Kim JW. State and Trait Anxiety Related Gamma Oscillations  
1193 in Patients With Anxiety Within the Research Domain Criteria Framework. *Psychiatry*  
1194 *Investig*. 2022 Jun;19(6):443–50.
- 1195 15. Lewis DA, Hashimoto T, Volk DW. Cortical inhibitory neurons and schizophrenia. *Nat Rev*  
1196 *Neurosci*. 2005 Apr;6(4):312–24.
- 1197 16. Spencer KM, Nestor PG, Niznikiewicz MA, Salisbury DF, Shenton ME, McCarley RW.  
1198 Abnormal Neural Synchrony in Schizophrenia. *J Neurosci*. 2003 Aug 13;23(19):7407–11.
- 1199 17. Murty DV, Manikandan K, Kumar WS, Ramesh RG, Purokayastha S, Nagendra B, et al.  
1200 Stimulus-induced gamma rhythms are weaker in human elderly with mild cognitive  
1201 impairment and Alzheimer’s disease. Vinck M, Colgin LL, Bosman CA, editors. *eLife*. 2021  
1202 Jun 8;10:e61666.
- 1203 18. Traikapi A, Konstantinou N. Gamma Oscillations in Alzheimer’s Disease and Their  
1204 Potential Therapeutic Role. *Front Syst Neurosci* [Internet]. 2021 [cited 2023 Dec 13];15.  
1205 Available from: <https://www.frontiersin.org/articles/10.3389/fnsys.2021.782399>
- 1206 19. Fagiolini M, Fritschy JM, Löw K, Möhler H, Rudolph U, Hensch TK. Specific GABAA  
1207 circuits for visual cortical plasticity. *Science*. 2004 Mar 12;303(5664):1681–3.
- 1208 20. Canetta SE, Holt ES, Benoit LJ, Teboul E, Sahyoun GM, Ogden RT, et al. Mature  
1209 parvalbumin interneuron function in prefrontal cortex requires activity during a postnatal  
1210 sensitive period. Colgin LL, Di Cristo G, Roy A, editors. *eLife*. 2022 Dec 28;11:e80324.
- 1211 21. Jiang B, Huang ZJ, Morales B, Kirkwood A. Maturation of GABAergic transmission and the  
1212 timing of plasticity in visual cortex. *Brain Res Rev*. 2005 Dec;50(1):126–33.
- 1213 22. Chung DW, Fish KN, Lewis DA. Pathological basis for deficient excitatory drive to cortical  
1214 parvalbumin interneurons in schizophrenia. *Am J Psychiatry*. 2016 Nov 1;173(11):1131–9.
- 1215 23. Toker L, Mancarci BO, Tripathy S, Pavlidis P. Transcriptomic evidence for alterations in  
1216 astrocytes and parvalbumin interneurons in bipolar disorder and schizophrenia subjects.  
1217 *Biol Psychiatry*. 2018 Dec 1;84(11):787–96.
- 1218 24. Akbarian S, Huang HS. Molecular and cellular mechanisms of altered GAD1/GAD67  
1219 expression in schizophrenia and related disorders. *Brain Res Rev*. 2006 Sep 1;52(2):293–  
1220 304.
- 1221 25. Beneyto M, Abbott A, Hashimoto T, Lewis DA. Lamina-Specific Alterations in Cortical  
1222 GABAA Receptor Subunit Expression in Schizophrenia. *Cereb Cortex*. 2011 May  
1223 1;21(5):999–1011.
- 1224 26. del Pino I, García-Frigola C, Dehorter N, Brotons-Mas JR, Alvarez-Salvado E,  
1225 Martínez de Lagrán M, et al. *ErbB4* Deletion from Fast-Spiking Interneurons Causes  
1226 Schizophrenia-like Phenotypes. *Neuron*. 2013 Sep 18;79(6):1152–68.

- 1227 27. Chung DW, Wills ZP, Fish KN, Lewis DA. Developmental pruning of excitatory synaptic  
1228 inputs to parvalbumin interneurons in monkey prefrontal cortex. *Proc Natl Acad Sci*  
1229 [Internet]. 2017 Jan 24 [cited 2023 Dec 11];114(4). Available from:  
1230 <https://pnas.org/doi/full/10.1073/pnas.1610077114>
- 1231 28. Seshadri S, Faust T, Ishizuka K, Delevich K, Chung Y, Kim SH, et al. Interneuronal DISC1  
1232 regulates NRG1-ErbB4 signalling and excitatory–inhibitory synapse formation in the  
1233 mature cortex. *Nat Commun*. 2015 Dec 11;6(1):10118.
- 1234 29. Ripke S, Neale BM, Corvin A, Walters JT, Farh KH, Holmans PA, et al. Biological Insights  
1235 From 108 Schizophrenia-Associated Genetic Loci. *Nature*. 2014 Jul 24;511(7510):421–7.
- 1236 30. Mokhtari R, Lachman HM. The Major Histocompatibility Complex (MHC) in Schizophrenia:  
1237 A Review. *J Clin Cell Immunol*. 2016 Dec;7(6):479.
- 1238 31. Li J, Yoshikawa A, Alliey-Rodriguez N, Meltzer HY. Schizophrenia risk loci from xMHC  
1239 region were associated with antipsychotic response in chronic schizophrenic patients with  
1240 persistent positive symptom. *Transl Psychiatry*. 2022 Mar 7;12(1):1–9.
- 1241 32. Datwani A, McConnell MJ, Kanold PO, Micheva KD, Busse B, Shamloo M, et al. Classical  
1242 MHC I Molecules Regulate Retinogeniculate Refinement and Limit Ocular Dominance  
1243 Plasticity. *Neuron*. 2009 Nov 25;64(4):463–70.
- 1244 33. Sekar A, Bialas AR, de Rivera H, Davis A, Hammond TR, Kamitaki N, et al. Schizophrenia  
1245 risk from complex variation of complement component 4. *Nature*. 2016  
1246 Feb;530(7589):177–83.
- 1247 34. Comer AL, Jinadasa T, Sriram B, Phadke RA, Kretsge LN, Nguyen TPH, et al. Increased  
1248 expression of schizophrenia-associated gene C4 leads to hypoconnectivity of prefrontal  
1249 cortex and reduced social interaction. *PLOS Biol*. 2020 Jan 14;18(1):e3000604.
- 1250 35. MacDonald AW, Carter CS, Kerns JG, Ursu S, Barch DM, Holmes AJ, et al. Specificity of  
1251 Prefrontal Dysfunction and Context Processing Deficits to Schizophrenia in Never-  
1252 Medicated Patients With First-Episode Psychosis. *Am J Psychiatry*. 2005 Mar;162(3):475–  
1253 84.
- 1254 36. Green MF, Horan WP, Lee J. Social cognition in schizophrenia. *Nat Rev Neurosci*. 2015  
1255 Oct;16(10):620–31.
- 1256 37. Selemon LD, Zecevic N. Schizophrenia: a tale of two critical periods for prefrontal cortical  
1257 development. *Transl Psychiatry*. 2015 Aug;5(8):e623–e623.
- 1258 38. Pizzagalli DA, Roberts AC. Prefrontal cortex and depression. *Neuropsychopharmacology*.  
1259 2022 Jan;47(1):225–46.
- 1260 39. Gamo NJ, Arnsten AFT. Molecular Modulation of Prefrontal Cortex: Rational Development  
1261 of Treatments for Psychiatric Disorders. *Behav Neurosci*. 2011 Jun;125(3):282–96.
- 1262 40. Kenwood MM, Kalin NH, Barbas H. The prefrontal cortex, pathological anxiety, and anxiety  
1263 disorders. *Neuropsychopharmacology*. 2022 Jan;47(1):260–75.

- 1264 41. Kumar P, Goettemoeller AM, Espinosa-Garcia C, Tobin BR, Tfaily A, Nelson RS, et al.  
1265 Native-state proteomics of Parvalbumin interneurons identifies novel molecular signatures  
1266 and metabolic vulnerabilities to early Alzheimer's disease pathology. *bioRxiv*. 2023 May  
1267 17;2023.05.17.541038.
- 1268 42. Kann O, Papageorgiou IE, Draguhn A. Highly Energized Inhibitory Interneurons are a  
1269 Central Element for Information Processing in Cortical Networks. *J Cereb Blood Flow  
1270 Metab*. 2014 Aug 1;34(8):1270–82.
- 1271 43. Ruden JB, Dugan LL, Konradi C. Parvalbumin interneuron vulnerability and brain  
1272 disorders. *Neuropsychopharmacology*. 2021 Jan;46(2):279–87.
- 1273 44. Whittaker RG, Turnbull DM, Whittington MA, Cunningham MO. Impaired mitochondrial  
1274 function abolishes gamma oscillations in the hippocampus through an effect on fast-spiking  
1275 interneurons. *Brain*. 2011 Jul 1;134(7):e180.
- 1276 45. Gulyás AI, Megías M, Emri Z, Freund TF. Total Number and Ratio of Excitatory and  
1277 Inhibitory Synapses Converging onto Single Interneurons of Different Types in the CA1  
1278 Area of the Rat Hippocampus. *J Neurosci*. 1999 Nov 15;19(22):10082–97.
- 1279 46. Mackenzie-Gray Scott CA, Pelkey KA, Caccavano AP, Abebe D, Lai M, Black KN, et al.  
1280 Resilient Hippocampal Gamma Rhythmogenesis and Parvalbumin-Expressing Interneuron  
1281 Function Before and After Plaque Burden in 5xFAD Alzheimer's Disease Model. *Front  
1282 Synaptic Neurosci [Internet]*. 2022 [cited 2023 Dec 27];14. Available from:  
1283 <https://www.frontiersin.org/articles/10.3389/fnsyn.2022.857608>
- 1284 47. Palop JJ, Mucke L. Network abnormalities and interneuron dysfunction in Alzheimer  
1285 disease. *Nat Rev Neurosci*. 2016 Dec;17(12):777–92.
- 1286 48. Contractor A, Ethell IM, Portera-Cailliau C. Cortical interneurons in autism. *Nat Neurosci*.  
1287 2021 Dec;24(12):1648–59.
- 1288 49. Comer AL, Carrier M, Tremblay MÈ, Cruz-Martín A. The Inflamed Brain in Schizophrenia:  
1289 The Convergence of Genetic and Environmental Risk Factors That Lead to Uncontrolled  
1290 Neuroinflammation. *Front Cell Neurosci*. 2020 Aug 27;14:274.
- 1291 50. Zhan X, Cao M, Yoo AS, Zhang Z, Chen L, Crabtree GR, et al. Generation of BAF53b-Cre  
1292 transgenic mice with pan-neuronal Cre activities. *genesis*. 2015;53(7):440–8.
- 1293 51. Dolatshad H, Biggs D, Diaz R, Hortin N, Preece C, Davies B. A versatile transgenic allele  
1294 for mouse overexpression studies. *Mamm Genome*. 2015;26(11–12):598–608.
- 1295 52. Soriano P. Generalized lacZ expression with the ROSA26 Cre reporter strain. *Nat Genet*.  
1296 1999 Jan;21(1):70–1.
- 1297 53. McQuin C, Goodman A, Chernyshev V, Kamentsky L, Cimini BA, Karhohs KW, et al.  
1298 CellProfiler 3.0: Next-generation image processing for biology. *PLOS Biol*. 2018 Jul  
1299 3;16(7):e2005970.

- 1300 54. Stirling DR, Swain-Bowden MJ, Lucas AM, Carpenter AE, Cimini BA, Goodman A.  
1301 CellProfiler 4: improvements in speed, utility and usability. *BMC Bioinformatics*. 2021 Sep  
1302 10;22(1):433.
- 1303 55. Reference Atlas :: Allen Brain Atlas: Mouse Brain [Internet]. [cited 2023 Dec 4]. Available  
1304 from: <https://mouse.brain-map.org/static/atlas>
- 1305 56. Paxinos G, Franklin BJ. Paxinos and Franklin's the Mouse Brain in Stereotaxic  
1306 Coordinates. 4th ed. Academic Press; 2012.
- 1307 57. Data Acquisition Software - UCLA Miniscope [Internet]. [cited 2023 Nov 30]. Available  
1308 from: [http://miniscope.org/index.php/Data\\_Acquisition\\_Software](http://miniscope.org/index.php/Data_Acquisition_Software)
- 1309 58. Phadke RA, Wetzel AM, Fournier LA, Sha M, Padró-Luna NM, Cruz-Martín A. REVEALS:  
1310 An Open Source Multi Camera GUI For Rodent Behavior Acquisition [Internet]. *bioRxiv*;  
1311 2023 [cited 2023 Nov 30]. p. 2023.08.22.554365. Available from:  
1312 <https://www.biorxiv.org/content/10.1101/2023.08.22.554365v1>
- 1313 59. Johnson C, Kretsge LN, Yen WW, Sriram B, O'Connor A, Liu RS, et al. Highly unstable  
1314 heterogeneous representations in VIP interneurons of the anterior cingulate cortex. *Mol*  
1315 *Psychiatry*. 2022 May;27(5):2602–18.
- 1316 60. Guilloux JP, Seney M, Edgar N, Sibille E. Integrated Behavioral Z-Scoring Increases the  
1317 Sensitivity and Reliability of Behavioral Phenotyping in mice: Relevance to Emotionality  
1318 and Sex. *J Neurosci Methods*. 2011 Apr 15;197(1):21–31.
- 1319 61. Mathis A, Mamidanna P, Cury KM, Abe T, Murthy VN, Mathis MW, et al. DeepLabCut:  
1320 markerless pose estimation of user-defined body parts with deep learning. *Nat Neurosci*.  
1321 2018 Sep;21(9):1281–9.
- 1322 62. Sherfey JS, Soplata AE, Ardid S, Roberts EA, Stanley DA, Pittman-Polletta BR, et al.  
1323 DynaSim: A MATLAB Toolbox for Neural Modeling and Simulation. *Front Neuroinformatics*  
1324 [Internet]. 2018 [cited 2024 Feb 27];12. Available from:  
1325 <https://www.frontiersin.org/articles/10.3389/fninf.2018.00010>
- 1326 63. Fuhrmann G, Markram H, Tsodyks M. Spike frequency adaptation and neocortical  
1327 rhythms. *J Neurophysiol*. 2002 Aug;88(2):761–70.
- 1328 64. Doischer D, Hosp JA, Yanagawa Y, Obata K, Jonas P, Vida I, et al. Postnatal  
1329 Differentiation of Basket Cells from Slow to Fast Signaling Devices. *J Neurosci*. 2008 Nov  
1330 26;28(48):12956–68.
- 1331 65. Okaty BW, Miller MN, Sugino K, Hempel CM, Nelson SB. Transcriptional and  
1332 Electrophysiological Maturation of Neocortical Fast-Spiking GABAergic Interneurons. *J*  
1333 *Neurosci*. 2009 May 27;29(21):7040–52.
- 1334 66. Faselow EE, Connors BW. The Roles of Somatostatin-Expressing (GIN) and Fast-Spiking  
1335 Inhibitory Interneurons in UP-DOWN States of Mouse Neocortex. *J Neurophysiol*. 2010  
1336 Aug;104(2):596–606.

- 1337 67. Dayan P, Abbott LF. Theoretical neuroscience: computational and mathematical modeling  
1338 of neural systems. Cambridge, Mass: Massachusetts Institute of Technology Press; 2001.  
1339 460 p. (Computational neuroscience).
- 1340 68. Liu L, Xu H, Wang J, Li J, Tian Y, Zheng J, et al. Cell type–differential modulation of  
1341 prefrontal cortical GABAergic interneurons on low gamma rhythm and social interaction.  
1342 Sci Adv [Internet]. 2020 Jul [cited 2024 Feb 27];6(30). Available from:  
1343 <https://www.ncbi.nlm.nih.gov/pmc/articles/PMC7439507/>
- 1344 69. Wang T, Yan R, Zhang X, Wang Z, Duan H, Wang Z, et al. Paraventricular Thalamus  
1345 Dynamically Modulates Aversive Memory via Tuning Prefrontal Inhibitory Circuitry. J  
1346 Neurosci. 2023 May 17;43(20):3630–46.
- 1347 70. Kee T, Sanda P, Gupta N, Stopfer M, Bazhenov M. Feed-Forward versus Feedback  
1348 Inhibition in a Basic Olfactory Circuit. PLOS Comput Biol. 2015 Oct 12;11(10):e1004531.
- 1349 71. Ly C, Doiron B. Noise-enhanced coding in phasic neuron spike trains. PLOS ONE. 2017  
1350 May 4;12(5):e0176963.
- 1351 72. Magee JC. Dendritic Mechanisms of Phase Precession in Hippocampal CA1 Pyramidal  
1352 Neurons. J Neurophysiol. 2001 Jul;86(1):528–32.
- 1353 73. Blundon JA, Bayazitov IT, Zakharenko SS. Presynaptic Gating of Postsynaptically  
1354 Expressed Plasticity at Mature Thalamocortical Synapses. J Neurosci. 2011 Nov  
1355 2;31(44):16012–25.
- 1356 74. Elhilali M, Fritz JB, Klein DJ, Simon JZ, Shamma SA. Dynamics of Precise Spike Timing in  
1357 Primary Auditory Cortex. J Neurosci. 2004 Feb 4;24(5):1159–72.
- 1358 75. Lu T, Liang L, Wang X. Temporal and rate representations of time-varying signals in the  
1359 auditory cortex of awake primates. Nat Neurosci. 2001 Nov;4(11):1131–8.
- 1360 76. Nocon JC, Gritton H, Han X, Sen K. Differential Inhibitory Responses to Temporal  
1361 Features Enhance Cortical Coding of Dynamic Stimuli: A Network Model [Internet].  
1362 Neuroscience; 2022 Sep [cited 2024 Feb 27]. Available from:  
1363 <http://biorxiv.org/lookup/doi/10.1101/2022.09.22.509092>
- 1364 77. Seay MJ, Natan RG, Geffen MN, Buonomano DV. Differential Short-Term Plasticity of PV  
1365 and SST Neurons Accounts for Adaptation and Facilitation of Cortical Neurons to Auditory  
1366 Tones. J Neurosci. 2020 Nov 25;40(48):9224–35.
- 1367 78. Moore AK, Weible AP, Balmer TS, Trussell LO, Wehr M. Rapid Rebalancing of Excitation  
1368 and Inhibition by Cortical Circuitry. Neuron. 2018 Mar 21;97(6):1341-1355.e6.
- 1369 79. Toader O, von Heimendahl M, Schuelert N, Nissen W, Rosenbrock H. Suppression of  
1370 Parvalbumin Interneuron Activity in the Prefrontal Cortex Recapitulates Features of  
1371 Impaired Excitatory/Inhibitory Balance and Sensory Processing in Schizophrenia.  
1372 Schizophr Bull. 2020 Jul;46(4):981–9.
- 1373 80. Agetsuma M, Hamm JP, Tao K, Fujisawa S, Yuste R. Parvalbumin-Positive Interneurons  
1374 Regulate Neuronal Ensembles in Visual Cortex. Cereb Cortex. 2018 May 1;28(5):1831–45.



- 1375 81. Ito S, Hansen ME, Heiland R, Lumsdaine A, Litke AM, Beggs JM. Extending Transfer  
1376 Entropy Improves Identification of Effective Connectivity in a Spiking Cortical Network  
1377 Model. PLOS ONE. 2011 Nov 15;6(11):e27431.
- 1378 82. Schreiber T. Measuring Information Transfer. Phys Rev Lett. 2000 Jul 10;85(2):461–4.
- 1379 83. Zick JL, Crowe DA, Blackman RK, Schultz K, Bergstrand DW, DeNicola AL, et al.  
1380 Disparate insults relevant to schizophrenia converge on impaired spike synchrony and  
1381 weaker synaptic interactions in prefrontal local circuits. Curr Biol. 2022 Jan 10;32(1):14-  
1382 25.e4.
- 1383 84. Fischer MB, Ma M, Goerg S, Zhou X, Xia J, Finco O, et al. Regulation of the B cell  
1384 response to T-dependent antigens by classical pathway complement. J Immunol Baltim Md  
1385 1950. 1996 Jul 15;157(2):549–56.
- 1386 85. Hitoshi N, Ken-ichi Y, Jun-ichi M. Efficient selection for high-expression transfectants with  
1387 a novel eukaryotic vector. Gene. 1991 Dec 15;108(2):193–9.
- 1388 86. Jun-ichi M, Satoshi T, Kimi A, Fumi T, Akira T, Kiyoshi T, et al. Expression vector system  
1389 based on the chicken  $\beta$ -actin promoter directs efficient production of interleukin-5. Gene.  
1390 1989 Jul 15;79(2):269–77.
- 1391 87. Forni PE, Scuoppo C, Imayoshi I, Taulli R, Dastrù W, Sala V, et al. High levels of Cre  
1392 expression in neuronal progenitors cause defects in brain development leading to  
1393 microencephaly and hydrocephaly. J Neurosci Off J Soc Neurosci. 2006 Sep  
1394 13;26(37):9593–602.
- 1395 88. Baghdadi M, Mesaros A, Purrio M, Partridge L. Sex-specific effects of Cre expression in  
1396 Syn1Cre mice. Sci Rep. 2023 Jun 20;13(1):10037.
- 1397 89. Patel KR, Cherian J, Gohil K, Atkinson D. Schizophrenia: Overview and Treatment  
1398 Options. Pharm Ther. 2014 Sep;39(9):638–45.
- 1399 90. Braga RJ, Reynolds GP, Siris SG. Anxiety comorbidity in schizophrenia. Psychiatry Res.  
1400 2013 Nov 30;210(1):1–7.
- 1401 91. Kiran C, Chaudhury S. Prevalence of comorbid anxiety disorders in schizophrenia. Ind  
1402 Psychiatry J. 2016;25(1):35–40.
- 1403 92. Hall J. Schizophrenia — an anxiety disorder? Br J Psychiatry. 2017 Nov;211(5):262–3.
- 1404 93. George M, Maheshwari S, Chandran S, Manohar JS, Sathyanarayana Rao TS.  
1405 Understanding the schizophrenia prodrome. Indian J Psychiatry. 2017;59(4):505–9.
- 1406 94. Traynelis SF, Wollmuth LP, McBain CJ, Menniti FS, Vance KM, Ogden KK, et al.  
1407 Glutamate Receptor Ion Channels: Structure, Regulation, and Function. Pharmacol Rev.  
1408 2010 Sep;62(3):405.
- 1409 95. Williams SR, Stuart GJ. Role of dendritic synapse location in the control of action potential  
1410 output. Trends Neurosci. 2003 Mar 1;26(3):147–54.

- 1411 96. Alberto CO, Hirasawa M. AMPA receptor-mediated miniature EPSCs have heterogeneous  
1412 time courses in orexin neurons. *Biochem Biophys Res Commun*. 2010 Oct 1;400(4):707–  
1413 12.
- 1414 97. Olave I, Wang W, Xue Y, Kuo A, Crabtree GR. Identification of a polymorphic, neuron-  
1415 specific chromatin remodeling complex. *Genes Dev*. 2002 Oct 1;16(19):2509–17.
- 1416 98. Feinberg I. Schizophrenia: Caused by a fault in programmed synaptic elimination during  
1417 adolescence? *J Psychiatr Res*. 1982 Jan 1;17(4):319–34.
- 1418 99. Glantz LA, Lewis DA. Decreased Dendritic Spine Density on Prefrontal Cortical Pyramidal  
1419 Neurons in Schizophrenia. *Arch Gen Psychiatry*. 2000 Jan 1;57(1):65.
- 1420 100. Garey LJ, Ong WY, Patel TS, Kanani M, Davis A, Mortimer AM, et al. Reduced dendritic  
1421 spine density on cerebral cortical pyramidal neurons in schizophrenia. *J Neurol Neurosurg*  
1422 *Psychiatry*. 1998 Oct 1;65(4):446–53.
- 1423 101. Druart M, Nosten-Bertrand M, Poll S, Crux S, Nebeling F, Delhay C, et al. Elevated  
1424 expression of complement C4 in the mouse prefrontal cortex causes schizophrenia-  
1425 associated phenotypes. *Mol Psychiatry*. 2021 Apr 9;1–13.
- 1426 102. Chung DW, Volk DW, Arion D, Zhang Y, Sampson AR, Lewis DA. Dysregulated ErbB4  
1427 Splicing in Schizophrenia: Selective Effects on Parvalbumin Expression. *Am J Psychiatry*.  
1428 2016 Jan;173(1):60–8.
- 1429 103. Caccavano A, Bozzelli PL, Forcelli PA, Pak DTS, Wu JY, Conant K, et al. Inhibitory  
1430 Parvalbumin Basket Cell Activity is Selectively Reduced during Hippocampal Sharp Wave  
1431 Ripples in a Mouse Model of Familial Alzheimer’s Disease. *J Neurosci*. 2020 Jun  
1432 24;40(26):5116–36.
- 1433 104. Park K, Lee J, Jang HJ, Richards BA, Kohl MM, Kwag J. Optogenetic activation of  
1434 parvalbumin and somatostatin interneurons selectively restores theta-nested gamma  
1435 oscillations and oscillation-induced spike timing-dependent long-term potentiation impaired  
1436 by amyloid  $\beta$  oligomers. *BMC Biol*. 2020 Jan 15;18(1):7.
- 1437 105. Sauer JF, Strüber M, Bartos M. Impaired fast-spiking interneuron function in a genetic  
1438 mouse model of depression. *Raman IM, editor. eLife*. 2015 Mar 3;4:e04979.
- 1439 106. Perova Z, Delevich K, Li B. Depression of Excitatory Synapses onto Parvalbumin  
1440 Interneurons in the Medial Prefrontal Cortex in Susceptibility to Stress. *J Neurosci*. 2015  
1441 Feb 18;35(7):3201–6.
- 1442 107. Mao W, Watanabe T, Cho S, Frost JL, Truong T, Zhao X, et al. Shank1 regulates  
1443 excitatory synaptic transmission in mouse hippocampal Parvalbumin-expressing inhibitory  
1444 interneurons. *Eur J Neurosci*. 2015 Apr;41(8):1025–35.
- 1445 108. Roberts E. Prospects for research on schizophrenia. An hypotheses suggesting that there  
1446 is a defect in the GABA system in schizophrenia. *Neurosci Res Program Bull*. 1972  
1447 Nov;10(4):468–82.

- 1448 109. Lewis DA, Moghaddam B. Cognitive Dysfunction in Schizophrenia: Convergence of  $\gamma$ -  
1449 Aminobutyric Acid and Glutamate Alterations. *Arch Neurol*. 2006 Oct 1;63(10):1372–6.
- 1450 110. Kehrer C, Maziashvili N, Dugladze T, Gloveli T. Altered excitatory-inhibitory balance in the  
1451 NMDA-hypofunction model of schizophrenia. *Front Mol Neurosci* [Internet]. 2008 [cited  
1452 2023 Dec 21];1. Available from:  
1453 <https://www.frontiersin.org/articles/10.3389/neuro.02.006.2008>
- 1454 111. Nakazawa K, Sapkota K. The origin of NMDA receptor hypofunction in schizophrenia.  
1455 *Pharmacol Ther*. 2020 Jan;205:107426.
- 1456 112. Olney JW, Farber NB. Glutamate Receptor Dysfunction and Schizophrenia. *Arch Gen*  
1457 *Psychiatry*. 1995 Dec 1;52(12):998–1007.
- 1458 113. Cruz-Martín A, Schweizer FE. Imbalance between excitation and inhibition among synaptic  
1459 connections of CA3 pyramidal neurons in cultured hippocampal slices. *Eur J Neurosci*.  
1460 2008 Mar;27(6):1353–63.
- 1461 114. Gomez-Arboledas A, Acharya MM, Tenner AJ. The Role of Complement in Synaptic  
1462 Pruning and Neurodegeneration. *ImmunoTargets Ther*. 2021 Sep 24;10:373–86.
- 1463 115. Druart M, Le Magueresse C. Emerging Roles of Complement in Psychiatric Disorders.  
1464 *Front Psychiatry* [Internet]. 2019 [cited 2022 May 14];10. Available from:  
1465 <https://www.frontiersin.org/article/10.3389/fpsy.2019.00573>
- 1466 116. Hammond TR, Robinton D, Stevens B. Microglia and the Brain: Complementary Partners  
1467 in Development and Disease. *Annu Rev Cell Dev Biol*. 2018;34(1):523–44.
- 1468 117. Stevens B, Allen NJ, Vazquez LE, Howell GR, Christopherson KS, Nouri N, et al. The  
1469 Classical Complement Cascade Mediates CNS Synapse Elimination. *Cell*. 2007 Dec  
1470 14;131(6):1164–78.
- 1471 118. Dejanovic B, Wu T, Tsai MC, Graykowski D, Gandham VD, Rose CM, et al. Complement  
1472 C1q-dependent excitatory and inhibitory synapse elimination by astrocytes and microglia in  
1473 Alzheimer’s disease mouse models. *Nat Aging*. 2022 Sep;2(9):837–50.
- 1474 119. Schafer DP, Lehrman EK, Kautzman AG, Koyama R, Mardinly AR, Yamasaki R, et al.  
1475 Microglia Sculpt Postnatal Neural Circuits in an Activity and Complement-Dependent  
1476 Manner. *Neuron*. 2012 May 24;74(4):691–705.
- 1477 120. Liddel SA, Guttenplan KA, Clarke LE, Bennett FC, Bohlen CJ, Schirmer L, et al.  
1478 Neurotoxic reactive astrocytes are induced by activated microglia. *Nature*. 2017  
1479 Jan;541(7638):481–7.
- 1480 121. Lian H, Yang L, Cole A, Sun L, Chiang ACA, Fowler SW, et al. NF $\kappa$ B-Activated Astroglial  
1481 Release of Complement C3 Compromises Neuronal Morphology and Function Associated  
1482 with Alzheimer’s Disease. *Neuron*. 2015 Jan 7;85(1):101–15.
- 1483 122. Lee JD, Kamaruzaman NA, Fung JNT, Taylor SM, Turner BJ, Atkin JD, et al.  
1484 Dysregulation of the complement cascade in the hSOD1G93A transgenic mouse model of  
1485 amyotrophic lateral sclerosis. *J Neuroinflammation*. 2013 Sep 26;10:119.

- 1486 123. Zhou J, Wade SD, Graykowski D, Xiao MF, Zhao B, Giannini LAA, et al. The neuronal  
1487 pentraxin Nptx2 regulates complement activity and restrains microglia-mediated synapse  
1488 loss in neurodegeneration. *Sci Transl Med*. 2023 Mar 29;15(689):eadf0141.
- 1489 124. Phadke RA, Kruzich E, Fournier LA, Brack A, Sha M, Picard I, et al. C4 induces  
1490 pathological synaptic loss by impairing AMPAR trafficking. *BioRxiv Prepr Serv Biol*. 2023  
1491 Sep 29;2023.09.09.556388.
- 1492 125. Kruzich E, Phadke RA, Brack A, Stroumbakis D, Infante O, Cruz-Martín A. A pipeline for  
1493 STED super-resolution imaging and Imaris analysis of nanoscale synapse organization in  
1494 mouse cortical brain slices. *STAR Protoc*. 2023 Dec;4(4):102707.
- 1495 126. Kessler RC, Berglund P, Demler O, Jin R, Merikangas KR, Walters EE. Lifetime  
1496 Prevalence and Age-of-Onset Distributions of DSM-IV Disorders in the National  
1497 Comorbidity Survey Replication. *Arch Gen Psychiatry*. 2005 Jun 1;62(6):593–602.
- 1498 127. Calhoun GG, Tye KM. Resolving the neural circuits of anxiety. *Nat Neurosci*. 2015  
1499 Oct;18(10):1394–404.
- 1500 128. Bandelow B, Michaelis S, Wedekind D. Treatment of anxiety disorders. *Dialogues Clin*  
1501 *Neurosci*. 2017 Jun;19(2):93–107.
- 1502 129. Comer AL, Jinadasa T, Sriram B, Phadke RA, Kretsge LN, Nguyen TPH, et al. Increased  
1503 expression of schizophrenia-associated gene C4 leads to hypoconnectivity of prefrontal  
1504 cortex and reduced social interaction. Nestler EJ, editor. *PLOS Biol*. 2020 Jan  
1505 14;18(1):e3000604.
- 1506 130. Arnsten AFT. Stress signalling pathways that impair prefrontal cortex structure and  
1507 function. *Nat Rev Neurosci*. 2009 Jun;10(6):410–22.
- 1508 131. Duffney LJ, Zhong P, Wei J, Matas E, Cheng J, Qin L, et al. Autism-like Deficits in Shank3-  
1509 Deficient Mice Are Rescued by Targeting Actin Regulators. *Cell Rep*. 2015  
1510 Jun;11(9):1400–13.
- 1511 132. Sceniak MP, Lang M, Enomoto AC, James Howell C, Hermes DJ, Katz DM. Mechanisms  
1512 of Functional Hypoconnectivity in the Medial Prefrontal Cortex of Mecp2 Null Mice. *Cereb*  
1513 *Cortex*. 2016 May 1;26(5):1938–56.
- 1514 133. Lee AT, Cunniff MM, See JZ, Wilke SA, Luongo FJ, Ellwood IT, et al. VIP Interneurons  
1515 Contribute to Avoidance Behavior by Regulating Information Flow across Hippocampal-  
1516 Prefrontal Networks. *Neuron*. 2019 Jun;102(6):1223-1234.e4.
- 1517 134. Courtin J, Chaudun F, Rozeske RR, Karalis N, Gonzalez-Campo C, Wurtz H, et al.  
1518 Prefrontal parvalbumin interneurons shape neuronal activity to drive fear expression.  
1519 *Nature*. 2014 Jan;505(7481):92–6.
- 1520 135. Bicks LK, Koike H, Akbarian S, Morishita H. Prefrontal Cortex and Social Cognition in  
1521 Mouse and Man. *Front Psychol [Internet]*. 2015 [cited 2023 Dec 22];6. Available from:  
1522 <https://www.frontiersin.org/articles/10.3389/fpsyg.2015.01805>

- 1523 136. Forbes CE, Grafman J. The role of the human prefrontal cortex in social cognition and  
1524 moral judgment. *Annu Rev Neurosci.* 2010;33:299–324.
- 1525 137. Bicks LK, Yamamuro K, Flanigan ME, Kim JM, Kato D, Lucas EK, et al. Prefrontal  
1526 parvalbumin interneurons require juvenile social experience to establish adult social  
1527 behavior. *Nat Commun.* 2020 Feb 21;11(1):1003.
- 1528 138. Bennett FC, Molofsky AV. The immune system and psychiatric disease: a basic science  
1529 perspective. *Clin Exp Immunol.* 2019 Sep;197(3):294–307.
- 1530 139. Hodes GE, Kana V, Menard C, Merad M, Russo SJ. Neuroimmune mechanisms of  
1531 depression. *Nat Neurosci.* 2015 Oct;18(10):1386–93.
- 1532 140. Miller AH, Raison CL. The role of inflammation in depression: from evolutionary imperative  
1533 to modern treatment target. *Nat Rev Immunol.* 2016 Jan;16(1):22–34.
- 1534 141. Estes ML, McAllister AK. Immune mediators in the brain and peripheral tissues in autism  
1535 spectrum disorder. *Nat Rev Neurosci.* 2015 Aug;16(8):469–86.
- 1536 142. Hou R, Baldwin DS. A neuroimmunological perspective on anxiety disorders. *Hum*  
1537 *Psychopharmacol.* 2012 Jan;27(1):6–14.
- 1538 143. Aw E, Zhang Y, Yalcin E, Herrmann US, Carroll MC. Chapter Two - Neuropsychiatric  
1539 disorders: An immunological perspective. In: Alt FW, Murphy KM, editors. *Advances in*  
1540 *Immunology* [Internet]. Academic Press; 2021 [cited 2023 Dec 13]. p. 83–155. Available  
1541 from: <https://www.sciencedirect.com/science/article/pii/S0065277621000316>
- 1542 144. Steen VM, Nepal C, Erslund KM, Holdhus R, Nævdal M, Ratvik SM, et al.  
1543 Neuropsychological Deficits in Mice Depleted of the Schizophrenia Susceptibility Gene  
1544 CSMD1. *PLOS ONE.* 2013 Nov 14;8(11):e79501.
- 1545 145. Crider A, Feng T, Pandya CD, Davis T, Nair A, Ahmed AO, et al. Complement component  
1546 3a receptor deficiency attenuates chronic stress-induced monocyte infiltration and  
1547 depressive-like behavior. *Brain Behav Immun.* 2018 May;70:246–56.
- 1548 146. Hensch TK, Bilimoria PM. Re-opening Windows: Manipulating Critical Periods for Brain  
1549 Development. *Cerebrum Dana Forum Brain Sci.* 2012 Aug 29;2012:11.
- 1550 147. Hensch TK. Bistable Parvalbumin Circuits Pivotal for Brain Plasticity. *Cell.* 2014 Jan  
1551 16;156(1):17–9.
- 1552 148. Donato F, Rompani SB, Caroni P. Parvalbumin-expressing basket-cell network plasticity  
1553 induced by experience regulates adult learning. *Nature.* 2013 Dec;504(7479):272–6.
- 1554 149. Aronitz EM, Kamermans BA, Duffy KR. Development of parvalbumin neurons and  
1555 perineuronal nets in the visual cortex of normal and dark-exposed cats. *J Comp Neurol.*  
1556 2021;529(11):2827–41.
- 1557 150. Dachtler J, Fox K. Do cortical plasticity mechanisms differ between males and females? *J*  
1558 *Neurosci Res.* 2017;95(1–2):518–26.



- 1559 151. Selemon LD. A role for synaptic plasticity in the adolescent development of executive  
1560 function. *Transl Psychiatry*. 2013 Mar;3(3):e238–e238.
- 1561 152. Chaudhury S, Sharma V, Kumar V, Nag TC, Wadhwa S. Activity-dependent synaptic  
1562 plasticity modulates the critical phase of brain development. *Brain Dev*. 2016 Apr  
1563 1;38(4):355–63.
- 1564 153. Kourosh-Arami M, Hosseini N, Komaki A. Brain is modulated by neuronal plasticity during  
1565 postnatal development. *J Physiol Sci*. 2021 Nov 17;71(1):34.
- 1566 154. Citri A, Malenka RC. Synaptic Plasticity: Multiple Forms, Functions, and Mechanisms.  
1567 *Neuropsychopharmacology*. 2008 Jan;33(1):18–41.
- 1568 155. Zick JL, Blackman RK, Crowe DA, Amirikian B, DeNicola AL, Netoff TI, et al. Blocking  
1569 NMDAR Disrupts Spike Timing and Decouples Monkey Prefrontal Circuits: Implications for  
1570 Activity-Dependent Disconnection in Schizophrenia. *Neuron*. 2018 Jun 27;98(6):1243-  
1571 1255.e5.
- 1572 156. Crowe DA, Willow A, Blackman RK, DeNicola AL, Chafee MV, Amirikian B. A prefrontal  
1573 network model operating near steady and oscillatory states links spike desynchronization  
1574 and synaptic deficits in schizophrenia. *Compte A, Huguenard JR, Compte A, Ahmadian Y,*  
1575 *editors. eLife*. 2024 Feb 6;13:e79352.
- 1576 157. Daskalakis ZJ, Christensen BK, Fitzgerald PB, Chen R. Dysfunctional Neural Plasticity in  
1577 Patients With Schizophrenia. *Arch Gen Psychiatry*. 2008 Apr 1;65(4):378–85.
- 1578 158. Papaleo F, Yang F, Paterson C, Palumbo S, Carr GV, Wang Y, et al. Behavioral,  
1579 Neurophysiological, and Synaptic Impairment in a Transgenic Neuregulin1 (NRG1-IV)  
1580 Murine Schizophrenia Model. *J Neurosci*. 2016 Apr 27;36(17):4859–75.
- 1581 159. Crabtree GW, Sun Z, Kvajo M, Broek JAC, Fénelon K, McKellar H, et al. Alteration of  
1582 Neuronal Excitability and Short-Term Synaptic Plasticity in the Prefrontal Cortex of a  
1583 Mouse Model of Mental Illness. *J Neurosci*. 2017 Apr 12;37(15):4158–80.
- 1584 160. Kvajo M, McKellar H, Drew LJ, Lepagnol-Bestel AM, Xiao L, Levy RJ, et al. Altered axonal  
1585 targeting and short-term plasticity in the hippocampus of *Disc1* mutant mice. *Proc Natl*  
1586 *Acad Sci*. 2011 Dec 6;108(49):E1349–58.
- 1587 161. Tang TTT, Yang F, Chen BS, Lu Y, Ji Y, Roche KW, et al. Dysbindin regulates  
1588 hippocampal LTP by controlling NMDA receptor surface expression. *Proc Natl Acad Sci*.  
1589 2009 Dec 15;106(50):21395–400.
- 1590 162. Nakazawa K, Jeevakumar V, Nakao K. Spatial and temporal boundaries of NMDA receptor  
1591 hypofunction leading to schizophrenia. *NPJ Schizophr*. 2017 Feb 3;3:7.
- 1592 163. Murray JD, Anticevic A, Gancsos M, Ichinose M, Corlett PR, Krystal JH, et al. Linking  
1593 Microcircuit Dysfunction to Cognitive Impairment: Effects of Disinhibition Associated with  
1594 Schizophrenia in a Cortical Working Memory Model. *Cereb Cortex N Y NY*. 2014  
1595 Apr;24(4):859–72.

1596 164. Babaev O, Piletti Chatain C, Krueger-Burg D. Inhibition in the amygdala anxiety circuitry.  
1597 Exp Mol Med. 2018 Apr;50(4):1–16.

1598 165. Krabbe S, Gründemann J, Lüthi A. Amygdala Inhibitory Circuits Regulate Associative Fear  
1599 Conditioning. Biol Psychiatry. 2018 May 15;83(10):800–9.

1600

1601

## 1602 **FIGURE LEGENDS**

1603 **Figure 1. A novel transgenic mouse line permits PV cell specific overexpression of**  
1604 **complement component 4. (A)** Genetic strategy. Positive selection marker (Neo), self-deletion  
1605 anchor (SDA) sites. Diphtheria toxin A (DTA) sites. The constitutive KI allele can be obtained  
1606 after Cre- or Flp-mediated recombination, yielding relatively strong or weak OE of *mC4*,  
1607 respectively. **(B)** Breeding scheme. **(C)** Increased levels of *mC4* in PV cells did not alter mouse  
1608 weights compared to controls. **(D)** OE of *mC4* in PV cells did not impact the distance traveled.  
1609 **(E)** Representative confocal images of PV cells (*magenta*) in mouse mPFC in P55-74 WT (*left*)  
1610 and KI (*right*) animals. *scale bar* = 100  $\mu$ m. L, layer. **(F)** mPFC Cell density, yellow box. Bregma  
1611 coordinates. AP, Anterior-posterior axis. **(G)** No difference in PV cell density between WT and  
1612 KI. **(H, top two rows)** Representative confocal images (40x) of a PV (first row) and somatostatin  
1613 (SST) cell (second row) in a WT mouse. **(H, bottom two rows)** Representative confocal images  
1614 (40x) of a PV (first row) and SST cell (second row) in a KI mouse. For all rows in H, *left to right*:  
1615 DAPI (*gray*), *mC4* (*red*), PV (*green*), SST (*cyan*), merged image without DAPI. **(I)** In P21 KI  
1616 mice, *mC4* was overexpressed in PV, but not in SST or all other DAPI-labeled cells. In P21 KI  
1617 mice, *mC4* expression was greater in PV than in SST and Other cells. **(J)** In P65 mice, *mC4*  
1618 was overexpressed in PV, but not in SST or all other DAPI-labeled cells. In KI mice, *mC4*  
1619 expression was greater in PV than in SST and Other cells. **(K, L)** No differences in PV  
1620 expression between groups. WT: blue squares, KI: red circles. All statistics, \* $p < 0.05$ , \*\* $p < 0.01$ ,  
1621 \*\*\* $p < 0.001$ , \*\*\*\* $p < 0.0001$ . For information on statistics, see Statistical Supplement. Mean  $\pm$   
1622 SEM shown.

1623

1624 **Figure 2. PV-specific mC4-OE causes an increase in anxiety-like behavior in male mice. (A)**  
1625 Timeline of behavioral assays. Mice were tracked in the light zone, represented by a green outline  
1626 (B). **(B)** Representative trajectories of WT (*blue*) and KI (*red*) mice in the light zone of the LDB  
1627 (colored traces). Yellow triangle, entrance to the light zone. **(C)** Percent time spent in the open  
1628 arms of the EZM did not differ between groups. **(D)** Decreased time in the EZM open arms in  
1629 male but not female KIs relative to WT. **(E)** KI mice spent less time in the light zone of the LDB  
1630 compared to WT mice. **(F)** No sex-dependent differences in LDB light zone time between groups.  
1631 **(G)** Latency to feed in the NSF did not differ between groups. **(H)** Increase in the latency to feed  
1632 for KI males compared to WT controls. **(I)** Significant increase in the Z-Anxiety of KI mice relative  
1633 to WT. **(J)** Compared to WT controls, there was an increase in the Z-Anxiety of KI male but not  
1634 KI female mice. WT: blue squares, KI: red circles. All statistics, \* $p < 0.05$ , \*\* $p < 0.01$ . For information  
1635 on statistics, see Statistical Supplement. Mean  $\pm$  SEM shown.

1636

1637 **Figure 3. Increased levels of *mC4* in PV cells disrupts active but not passive social**  
1638 **behaviors. (A)** Object interaction task (*left*). Representative trajectories of WT (*middle, blue*) and  
1639 KI (*right, red*) exploring a novel object (*black rectangle*). **(B)** KI mice explored the novel object as  
1640 much as WT controls. **(C)** Representative images of interaction sub-classes. *Active*, experimental  
1641 mouse engaging the stimulus mouse; *Passive*, stimulus mouse engaging the experimental  
1642 mouse. Percentage of each sub-class of behavior is below. **(D)** *Left*: Relative to WT controls, KI  
1643 mice spent less time engaged in the active snout-rear interaction type. *Right*: There were no sex-  
1644 related differences in active-snout-rear interaction between groups. **(E)** There was no change in  
1645 Z-Sociability in either KI male or female mice. WT: blue squares. KI: red circles. All  
1646 statistics, \* $p < 0.05$ , \*\* $p < 0.01$ . For information on statistics, see Statistical Supplement. Mean  $\pm$   
1647 SEM shown.

1648  
1649 **Figure 4. Sex-related difference in excitatory-inhibitory dynamics in mPFC PV cells with**  
1650 **increased levels of *mC4* in PV cells. (A)** Representative voltage-clamp traces of mEPSCs  
1651 recorded in PV cells of P40-60 WT (*blue*) and KI (*red*) mice, *scale bar* = 250 ms, 10 pA. **(B)** No  
1652 change in mEPSC amplitude in KI mice, compared to controls. **(C)** No shift in the cumulative  
1653 frequency distribution of mEPSC amplitudes in KI mice. **(D)** *mC4*-OE led to a decrease in mEPSC  
1654 frequency in KI male mice, but not KI female mice. **(E)** Increased *mC4* expression caused a  
1655 rightward shift in the distribution of mEPSC inter-event-intervals (IEIs) of PV cells in KI male mice,  
1656 but not KI female mice. **(F)** mEPSC Rise<sub>10-90</sub> was not impacted in KI mice, relative to WT controls.  
1657 **(G)** mEPSC Decay<sub>tau</sub> was not changed in KI mice. **(H)** Representative 1s voltage clamp traces of  
1658 mIPSCs recorded in PV cells of P40-60 WT (*blue*) and KI (*red*) mice, *scale bar* = 250 ms, 10 pA.  
1659 **(I)** mIPSC amplitude was increased in KI male, but not KI female mice. **(J)** Increased expression  
1660 of *mC4* caused a rightward shift in the distribution of mIPSC amplitudes in KI male mice. **(K)**  
1661 mIPSC frequency was not changed in KI mice. **(L)** No shift in the distribution of mIPSC IEIs of KI  
1662 mice. **(M)** Relative to controls, there were no changes in mIPSC Rise<sub>10-90</sub> with increased levels of  
1663 *mC4* in PV cells. **(N)** mIPSC Decay<sub>tau</sub> was not changed in KI mice. WT: blue squares. KI: red  
1664 circles. *N* represents cells. All statistics, \* $p < 0.05$ , \*\* $p < 0.01$ . For information on statistics, see  
1665 Statistical Supplement. Mean  $\pm$  SEM shown.

1666  
1667 **Figure 5. PV-specific *mC4*-OE leads to opposing changes in excitability of PV cells in male**  
1668 **and female mice. (A)** Representative recordings of PV cells injected with -100 (*black*), 140  
1669 (*darker colored shade*), and 230 pA (*lighter colored shade*) of current from WT (*blue*) and KI (*red*)  
1670 mice, *scale bar* = 200 ms, 200 pA/20 mV. Baseline  $V_m$ , -65 mV. **(B)** PV cells in KI male mice spike  
1671 less than PV cells in WT male mice. **(C)** *mC4*-OE led to an increase in the excitability of PV cells  
1672 in KI female mice, relative to controls. **(D)** Rheobase was decreased in KI female mice, relative  
1673 to controls. **(E)** PV-*mC4*-OE drove a shift in PV cell resting membrane voltage towards a more  
1674 depolarized  $V_m$ . **(F)** Representative recordings of PYRs injected with -100 (*black*), 140 (*darker*  
1675 *colored shade*), and 230 pA (*lighter colored shade*) from WT (*blue*) and KI (*red*) mice, *scale bar*  
1676 = 200 ms, 200 pA/20 mV. **(G)** OE of *mC4* decreased the spike frequency of PYRs in KI male  
1677 mice, relative to controls. **(H)** No differences in the excitability of PYRs in females between groups.  
1678 **(I)** No changes in PYR Rheobase. **(J)** No change overall in PYR resting  $V_m$  in KI mice, compared  
1679 to controls. WT: blue squares. KI: red circles. *N* represents cells. All statistics, \* $p < 0.05$ , \*\* $p < 0.01$ .  
1680 For information on statistics, see Statistical Supplement. Mean  $\pm$  SEM shown.

1681

1682 **Figure 6. No changes in anxiety-like behavior with pan-neuronal overexpression of mC4.**  
1683 (A) Mouse breeding (*top*) and anxiety behavioral battery (*bottom*) as in Fig. 2. (B, C) Pan-neuronal  
1684 mC4-OE does not alter locomotion. (D, E) No change in time spent in the open arms with pan-  
1685 neuronal mC4-OE. (F, G) Time spent in the light zone was not altered by pan-neuronal mC4-OE.  
1686 (H, I) OE of *mC4* in neurons did not alter feed latency. (J, K) mC4-OE in neurons did not lead to  
1687 changes in overall anxiety-like behavior. WT: blue squares. KI: red circles. All statistics, \* $p < 0.05$ .  
1688 For information on statistics, see Statistical Supplement. Mean  $\pm$  SEM shown.

1689  
1690 **Figure 7. Disrupted neural communication and hyperexcitability in a network model of**  
1691 **male mice with increased levels of mC4 in PV cells.** (A) Network architecture and applied  
1692 current ( $I_{app}$ ). (B) The firing rate (FR) of PV2 in WT and KI networks at peak  $I_{app}$  of 200 pA (*left*),  
1693 275 pA (*middle*), and 350 pA (*right*). (C) The FR of PYR2 in WT and KI networks at peak  $I_{app}$  of  
1694 200 pA (*left*), 275 pA (*middle*), and 350 pA (*right*). (D) Transfer entropy (TE) at each delay (lag)  
1695 of PYR1 onto PYR2 in male WT (*blue*) and male KI (*red*) networks at peak  $I_{app}$  of 200 pA (*left*),  
1696 275 pA (*middle*), and 350 pA (*right*). (E) TE at each delay (lag) of PYR1 onto PYR2 in female  
1697 WT (*blue*) and female KI (*red*) networks at peak  $I_{app}$  of 200 pA (*left*), 275 pA (*middle*), and 350  
1698 pA (*right*). WT network: blue squares. KI network: red circles.  $N$ , simulations.  $N=15$  for all  
1699 networks. For information on statistics, see Statistical Supplement. Mean  $\pm$  SEM shown. For all  
1700 plots, '#' indicates all  $p < 0.05$ .

1701

## 1702 **SUPPLEMENTAL FIGURE AND TABLE LEGENDS**

1703 **Supplemental Figure 1. No change in latency to feed in the Cage NSF in PV-mC4-KI mice**  
1704 **relative to controls.** (A) Schematic of the Cage NSF. Latency to feed (s) was measured when  
1705 WT or KI mice were placed in a more familiar environment, a standard cage. (B) No change in  
1706 the latency to feed between WT and KI mice (Mann-Whitney test,  $p=0.5881$ ). (C) No change in  
1707 the latency to feed between groups, separated by sex (Two-way ANOVA, Condition  $\times$  Sex:  
1708  $F_{(1,34)}=0.2861$ ,  $p=0.5962$ . Condition:  $F_{(1,34)}=0.4357$ ,  $p=0.5137$ . Sex:  $F_{(1,34)}=0.00207$ ,  $p=0.9640$ ).  
1709 WT: blue squares,  $N=12$  males,  $N=7$  females. KI: red circles,  $N=7$  males,  $N=12$  females. For all  
1710 statistics, \* $p < 0.05$ . Mean  $\pm$  SEM shown.

1711

1712 **Supplemental Figure 2. No changes in less-frequent sub-classes of social behavior with**  
1713 **increased levels of mC4 in PV cells.** (A) Both WT and KI mice initiate most interactions during  
1714 the juvenile interaction task (Condition  $\times$  Interaction class:  $F_{(1,92)}=4.484$ , \* $p=0.0369$ . Condition:  
1715  $F_{(1,92)}=2.881$ ,  $p=0.0930$ . Interaction class:  $F_{(1,92)}=236.1$ , \*\*\*\* $p < 0.0001$ . Post-test: Active vs.  
1716 Passive WT, \*\*\*\* $p < 0.0001$ , KI, \*\*\*\* $p < 0.0001$ ) with KI mice engaging less in active interactions  
1717 compared to controls (WT vs. KI, \* $p=0.0488$ ). (B, C) No change in reciprocal snout-snout  
1718 interactions (13% of total social interactions) in KI mice, compared to controls (B: Mann-Whitney  
1719 test,  $p=0.4993$ . C: Condition  $\times$  Sex:  $F_{(1,44)}=0.1482$ ,  $p=0.7021$ . Condition:  $F_{(1,44)}=0.3293$ ,  $p=0.5690$ .  
1720 Sex:  $F_{(1,44)}=0.2833$ ,  $p=0.5972$ ). (D, E) No change in the active snout-body interaction (23% of  
1721 total social interactions) in KI mice (D: t-test with Welch's correction,  $p=0.6501$ . E: Condition  $\times$   
1722 Sex:  $F_{(1,44)}=0.0133$ ,  $p=0.9088$ . Condition:  $F_{(1,44)}=0.2210$ ,  $p=0.6406$ . Sex:  $F_{(1,44)}=3.028$ ,  
1723  $p=0.0888$ ). (F, G) No differences in the passive snout-rear interaction (9% of total social  
1724 interactions) between groups (F: Mann-Whitney test,  $p=0.9186$ . G: Condition  $\times$  Sex:  $F_{(1,44)}=2.601$ ,



1725  $p=0.1139$ . Condition:  $F_{(1,44)}=0.2085$ ,  $p=0.6502$ . Sex:  $F_{(1,44)}=1.930$ ,  $p=0.1718$ ). (H, I) No  
1726 differences in the passive snout-body interaction (5% of total social interactions) between groups  
1727 (H: Mann-Whitney test,  $p=0.5392$ , I: Condition x Sex:  $F_{(1,44)}=3.745$ ,  $p=0.0594$ . Condition:  
1728  $F_{(1,44)}=0.4934$ ,  $p=0.4861$ . Sex:  $F_{(1,44)}=0.2645$ ,  $p=0.6096$ ). WT: blue squares,  $N=13$  males,  $N=12$   
1729 females. KI: red circles,  $N=12$  males,  $N=11$  females. For all statistics,  $*p<0.05$ ,  $**p<0.01$ ,  
1730  $***p<0.001$ ,  $****p<0.0001$ . Two-way ANOVA, unless otherwise stated. Mean  $\pm$  SEM shown.

1731

1732 **Supplemental Figure 3. Overexpression of *mC4* in PV cells did not alter social**  
1733 **interactions in the three-chamber assay. (A) (Top)** Schematic representation of three-  
1734 chamber assay. (Bottom) Representative trajectories (tracked with DLC) of WT (blue) and KI  
1735 (red) mice in the three-chamber assay. E, empty cup; M, mouse cup. (B) WT and KI mice spent  
1736 more time in the chamber containing the mouse cup compared to the empty-cup chamber,  
1737 suggesting that they prefer social interactions (Condition x Chamber:  $F_{(1,84)}=0.1733$ ,  $p=0.6782$ .  
1738 Condition:  $F_{(1,84)}=1.911$ ,  $p=0.1706$ . Chamber:  $F_{(1,84)}=34.19$ ,  $****p<0.0001$ . Post-test: Mouse vs.  
1739 Empty, WT  $**p=0.0013$ , KI,  $***p=0.0002$ ). (C, D) No change in the social discrimination index  
1740 (SI) between WT and KI mice (C: t-test with Welch's correction,  $p=0.9463$ . D: Condition x Sex:  
1741  $F_{(1,40)}=1.455$ ,  $p=0.2349$ . Condition:  $F_{(1,40)}=0.03420$ ,  $p=0.8542$ . Sex:  $F_{(1,40)}=1.643$ ,  $p=0.2074$ ).  
1742 WT: blue squares,  $N=10$  males,  $N=12$  females. KI: red circles,  $N=12$  males,  $N=10$  females. For  
1743 all statistics,  $*p<0.05$ ,  $**p<0.01$ ,  $***p<0.001$ , Two-way ANOVA, unless otherwise stated. Mean  $\pm$   
1744 SEM shown.

1745

1746 **Supplemental Figure 4. PV-specific *mC4*-OE alters the kinetics of mEPSCs in PYRs of**  
1747 **female mice. (A)** Representative 1 s traces of mEPSCs recorded in PYRs in P40-60 young adult  
1748 WT (blue) and KI (red) mice, scale bar = 250 ms, 10 pA. (B) No change in mEPSC amplitude in  
1749 KI mice, relative to controls (Condition x Sex:  $F_{(1,61)}=1.945$ ,  $p=0.1681$ . Condition:  $F_{(1,61)}=0.4158$ ,  
1750  $p=0.5214$ . Sex:  $F_{(1,61)}=1.397$ ,  $p=0.2418$ ). (C) No change in in mEPSC frequency in KI mice  
1751 (Condition x Sex:  $F_{(1,61)}=2.291$ ,  $p=0.1353$ . Condition:  $F_{(1,61)}=0.1903$ ,  $p=0.6642$ . Sex:  
1752  $F_{(1,61)}=3.341$ ,  $p=0.0725$ ). (D) *mC4*-OE did not alter mEPSC rise Rise<sub>10-90</sub> (Condition x Sex:  
1753  $F_{(1,61)}=3.916$ ,  $p=0.0524$ . Condition:  $F_{(1,61)}=0.3104$ ,  $p=0.5795$ . Sex:  $F_{(1,61)}=0.3120$ ,  $p=0.5785$ ). (E)  
1754 Increased expression of *mC4* led to a significant decrease in mEPSC Decay<sub>tau</sub> in KI females  
1755 (Condition x Sex:  $F_{(1,61)}=12.74$ ,  $***p=0.0007$ . Condition:  $F_{(1,61)}=0.3684$ ,  $p=0.5461$ . Sex:  
1756  $F_{(1,61)}=2.183$ ,  $p=0.1447$ . Post-test: WT vs. KI males,  $p=0.0822$ , females,  $**p=0.0083$ ). (F)  
1757 Representative 1 s traces of mIPSCs recorded in PYRs in young adult WT (blue) and KI (red)  
1758 mice, scale bar = 250 ms, 10 pA. (G) No change in mIPSC amplitude in KI mice, relative to  
1759 controls (Condition x Sex:  $F_{(1,60)}=0.5354$ ,  $p=0.4672$ . Condition:  $F_{(1,60)}=0.00013$ ,  $p=0.9909$ . Sex:  
1760  $F_{(1,60)}=0.00367$ ,  $p=0.9519$ ). (H) mIPSC frequency was not different between groups (Condition x  
1761 Sex:  $F_{(1,60)}=0.03569$ ,  $p=0.8508$ . Condition:  $F_{(1,60)}=0.2141$ ,  $p=0.6452$ . Sex:  $F_{(1,60)}=2.690$ ,  
1762  $p=0.1062$ ). (I) Increased expression of *mC4* did not impact mIPSC Rise<sub>10-90</sub> (Condition x Sex:  
1763  $F_{(1,60)}=0.3837$ ,  $p=0.5380$ . Condition:  $F_{(1,60)}=0.7667$ ,  $p=0.3847$ . Sex:  $F_{(1,60)}=5.047$ ,  $*p=0.0284$ .  
1764 Post-test: WT vs. KI males,  $p=0.9795$ , females,  $p=0.5025$ ). (J) Decay<sub>tau</sub> was not changed in KI  
1765 mice (Condition x Sex:  $F_{(1,60)}=1.153$ ,  $p=0.2871$ . Condition:  $F_{(1,60)}=0.7059$ ,  $p=0.4042$ . Sex:  
1766  $F_{(1,60)}=0.2624$ ,  $p=0.6104$ ). WT: blue squares. KI: red circles.  $N$  represents cells. mEPSC WT  
1767  $N=17$  males,  $N=16$  females; mEPSC KI:  $N=15$  males,  $N=17$  females. mIPSC WT  $N=16$  males,  
1768  $N=16$  females; mIPSC KI:  $N=16$  males,  $N=16$  females. For all statistics,  $*p<0.05$ ,  $**p<0.01$ , Two-  
1769 way ANOVA, unless otherwise stated. Mean  $\pm$  SEM shown.



1770

1771 **Supplemental Figure 5. Modeled PV and PYR units have similar firing rates as**  
1772 **experimental PV and PYR cells in acute brain slices.** For all frequency vs. current (FI curve)  
1773 plots, average experimental FI curve data (colored curve) is plotted against the equivalent FI  
1774 curve for the respective modeled cell (black curve). All insets show a representative voltage  
1775 trace from experimental data (colored voltage trace, top) and the voltage trace of the equivalent  
1776 modeled cell (black voltage trace, bottom). Inset traces for experimental PV cells and modeled  
1777 PV units (**A, C, E, and G**) are in response to an identical 230 pA square pulse (500 ms). Inset  
1778 traces for experimental PYR and modeled PYR units (**B, D, F, and H**) are in response to an  
1779 identical 350 pA square current pulse (500 ms). Scale for all insets, 200 ms/50 mV. (**A, B**) FI  
1780 curve comparisons for WT male PV cells (**A**) and PYR (**B**). (**C, D**) FI curve comparisons for WT  
1781 female PV cells (**C**) and PYR (**D**). (**E, F**) FI curve comparisons for KI male PV cells (**E**) and PYR  
1782 (**F**). (**G, H**) FI curve comparisons for KI female PV cells (**G**) and PYR (**H**).

1783

1784 **Supplemental Figure 6. A computational model reveals that changes associated with PV-**  
1785 **mC4-OE drive changes in PYR-PV information flow.** (**A**) Schematic showing the network  
1786 architecture and applied current ( $I_{app}$ ) of the computational model. (**B**) Plots showing the  
1787 average transfer entropy (TE) at each delay (lag) of PYR1 onto PV2 in male WT (*blue*) and  
1788 male KI (*red*) networks at peak  $I_{app}$  of 200 pA (*top*, Condition x Lag:  $F_{(7,196)}=67.00$ , \*\*\*\* $p<0.0001$ .  
1789 Condition:  $F_{(1,28)}=448.8$ , \*\*\*\* $p<0.0001$ . Lag:  $F_{(1.541,43.16)}=93.00$ , \*\*\*\* $p<0.0001$ ), 275 pA (*middle*,  
1790 Condition x Lag:  $F_{(7,196)}=51.27$ , \*\*\*\* $p<0.0001$ . Condition:  $F_{(1,28)}=339.8$ , \*\*\*\* $p<0.0001$ . Lag:  
1791  $F_{(1.603,44.90)}=73.85$ , \*\*\*\* $p<0.0001$ ), and 350 pA (*bottom*, Condition x Lag:  $F_{(7,196)}=42.06$ ,  
1792 \*\*\*\* $p<0.0001$ . Condition:  $F_{(1,28)}=307.0$ , \*\*\*\* $p<0.0001$ . Lag:  $F_{(2.123,59.44)}=73.98$ , \*\*\*\* $p<0.0001$ ). (**C**)  
1793 Plots showing the average transfer entropy (TE) at each delay (lag) of PYR1 onto PV2 in female  
1794 WT (*blue*) and female KI (*red*) networks at peak  $I_{app}$  of 200pA (*top*, Condition x Lag:  
1795  $F_{(7,196)}=8.426$ , \*\*\*\* $p<0.0001$ . Condition:  $F_{(1,28)}=10.37$ , \*\* $p=0.0032$ . Lag:  $F_{(1.507,42.19)}=141.1$ ,  
1796 \*\*\*\* $p<0.0001$ ), 275 pA (*middle*, Condition x Lag:  $F_{(7,196)}=8.855$ , \*\*\*\* $p<0.0001$ . Condition:  
1797  $F_{(1,28)}=41.96$ , \*\*\*\* $p<0.0001$ . Lag:  $F_{(1.367,38.27)}=83.36$ , \*\*\*\* $p<0.0001$ ), and 350 pA (*bottom*,  
1798 Condition x Lag:  $F_{(7,196)}=11.66$ , \*\*\*\* $p<0.0001$ . Condition:  $F_{(1,28)}=43.53$ , \*\*\*\* $p<0.0001$ . Lag:  
1799  $F_{(1.567,43.87)}=122.8$ , \*\*\*\* $p<0.0001$ ). (**D**) The average latency from one PYR1 spike to the next  
1800 soonest PV2 spike in WT and KI networks at peak  $I_{app}$  of 200 pA (*left*, Condition x Sex:  
1801  $F_{(1,56)}=127.8$ , \*\*\*\* $p<0.0001$ . Condition:  $F_{(1,56)}=85.53$ , \*\*\*\* $p<0.0001$ . Sex:  $F_{(1,56)}=96.97$ ,  
1802 \*\*\*\* $p<0.0001$ . Post-test: WT vs. KI males, \*\*\*\* $p<0.0001$ , females,  $p=0.2803$ ), 275 pA (*middle*,  
1803 Condition x Sex:  $F_{(1,56)}=141.7$ , \*\*\*\* $p<0.0001$ . Condition:  $F_{(1,56)}=65.75$ , \*\*\*\* $p<0.0001$ . Sex:  
1804  $F_{(1,56)}=133.0$ , \*\*\*\* $p<0.0001$ . Post-test: WT vs. KI males, \*\*\*\* $p<0.0001$ , females, \* $p=0.0191$ ), and  
1805 350 pA (*right*, Condition x Sex:  $F_{(1,56)}=83.60$ , \*\*\*\* $p<0.0001$ . Condition:  $F_{(1,56)}=31.45$ ,  
1806 \*\*\*\* $p<0.0001$ . Sex:  $F_{(1,56)}=75.19$ , \*\*\*\* $p<0.0001$ . Post-test: WT vs. KI males, \*\*\*\* $p<0.0001$ ,  
1807 females, \* $p=0.0305$ ). (**E**) The standard deviation of the latency from one PYR1 spike to the next  
1808 soonest PV2 spike in WT and KI networks at peak  $I_{app}$  of 200 pA (*left*, Condition x Sex:  
1809  $F_{(1,56)}=32.54$ , \*\*\*\* $p<0.0001$ . Condition:  $F_{(1,56)}=11.29$ , \*\* $p=0.0014$ . Sex:  $F_{(1,56)}=17.23$ ,  
1810 \*\*\* $p=0.0001$ . Post-test: WT vs. KI males, \*\*\*\* $p<0.0001$ , females,  $p=0.1953$ ), 275 pA (*middle*,  
1811 Condition x Sex:  $F_{(1,56)}=71.33$ , \*\*\*\* $p<0.0001$ . Condition:  $F_{(1,56)}=8.837$ , \*\* $p=0.0043$ . Sex:  
1812  $F_{(1,56)}=68.89$ , \*\*\*\* $p<0.0001$ . Post-test: WT vs. KI males, \*\*\*\* $p<0.0001$ , females, \*\*\* $p=0.0006$ ),  
1813 and 350 pA (*right*, Condition x Sex:  $F_{(1,56)}=34.73$ , \*\*\*\* $p<0.0001$ . Condition:  $F_{(1,56)}=2.936$ ,  
1814  $p=0.0921$ . Sex:  $F_{(1,56)}=26.08$ , \*\*\*\* $p<0.0001$ . Post-test: WT vs. KI males, \*\*\*\* $p<0.0001$ , females,

1815 \*\* $p=0.0091$ ). WT network: blue squares. KI network: red circles.  $N$  represents simulations.  $N=15$   
1816 for all networks. (F) Representative simulated traces of PYR2 membrane voltage (green)  
1817 overlaid with the timing of spikes of PYR1 (gray) and PV2 (orange) in the female WT (*top*) and  
1818 female KI (*bottom*) network, *scale bar* = 20 ms, 20mV. For all statistics, \* $p<0.05$ , \*\* $p<0.01$ ,  
1819 \*\*\* $p<0.001$ , \*\*\*\* $p<0.0001$ , Repeated-measure Two-way ANOVA with multiple comparisons (B,  
1820 C) or Two-way ANOVA (E, F). Mean  $\pm$  SEM shown. For all plots, '#' indicates all  $p<0.05$ .

1821

1822 **Supplemental Table 1. Active and passive electrophysiological properties of PV cells in**  
1823 **PV-mC4-WT and KI mice – Main Effects.** Table displays the main effects results of each Two-  
1824 way ANOVA for PV cells. Significant main effects ( $p<0.05$ ) are bolded.

1825

1826 **Supplemental Table 2. Active and passive electrophysiological properties of PV cells in**  
1827 **PV-mC4-WT and KI mice – Post-tests.** Table displays WT and KI means  $\pm$  SEM, and the  
1828 associated  $p$ -value (Šídák's multiple comparisons) for the comparison between conditions if  
1829 applicable. Data are separated by sex, male data on the left and female data on the right. For all  
1830 statistics \* $p<0.05$ , Two-way ANOVA. In all KI mice, resting  $V_m$  was significantly more depolarized  
1831 in response to PV-mC4-OE, relative to WT (WT:  $-67.25 \pm 0.8696$  mV vs. KI:  $-64.05 \pm 1.209$  mV,  
1832 t-test with Welch's correction, \* $p=0.0356$ ), data not shown in table.

1833

1834 **Supplemental Table 3. Active and passive electrophysiological properties of PYRs in PV-**  
1835 **mC4-WT and KI mice – Main Effects.** Table displays the main effects results of each Two-way  
1836 ANOVA for PYRs. Significant main effects ( $p<0.05$ ) are bolded.

1837

1838 **Supplemental Table 4. Active and passive electrophysiological properties of PYRs in PV-**  
1839 **mC4-WT and KI mice – Post-tests.** Table displays WT and KI means  $\pm$  SEM, and the associated  
1840  $p$ -value (Šídák's multiple comparisons) for the comparison between conditions if applicable. Data  
1841 are separated by sex, male data on the left and female data on the right. For all statistics \* $p<0.05$ ,  
1842 Two-way ANOVA.

1843

1844 **Supplemental Table 5. PYR and PV cell parameters used in computational model.** DynaSim  
1845 parameters. Specific values for  $E_L$ ,  $R_m$ ,  $C_m$ ,  $V_{thresh}$ , and  $V_{reset}$  were determined experimentally.

1846

1847 **Supplemental Table 6. Synaptic parameters used in computational model.** DynaSim  
1848 parameters. Synaptic connectivity conductance ( $g_{syn}$ ) was set to a default value of 0.03 for all  
1849 connections, and was only altered where mEPSC or mIPSC frequency or amplitude recorded in  
1850 PYR or PV cells was significantly different between groups across or within sex. Rise and decay  
1851 kinetics for all parameters were determined experimentally.

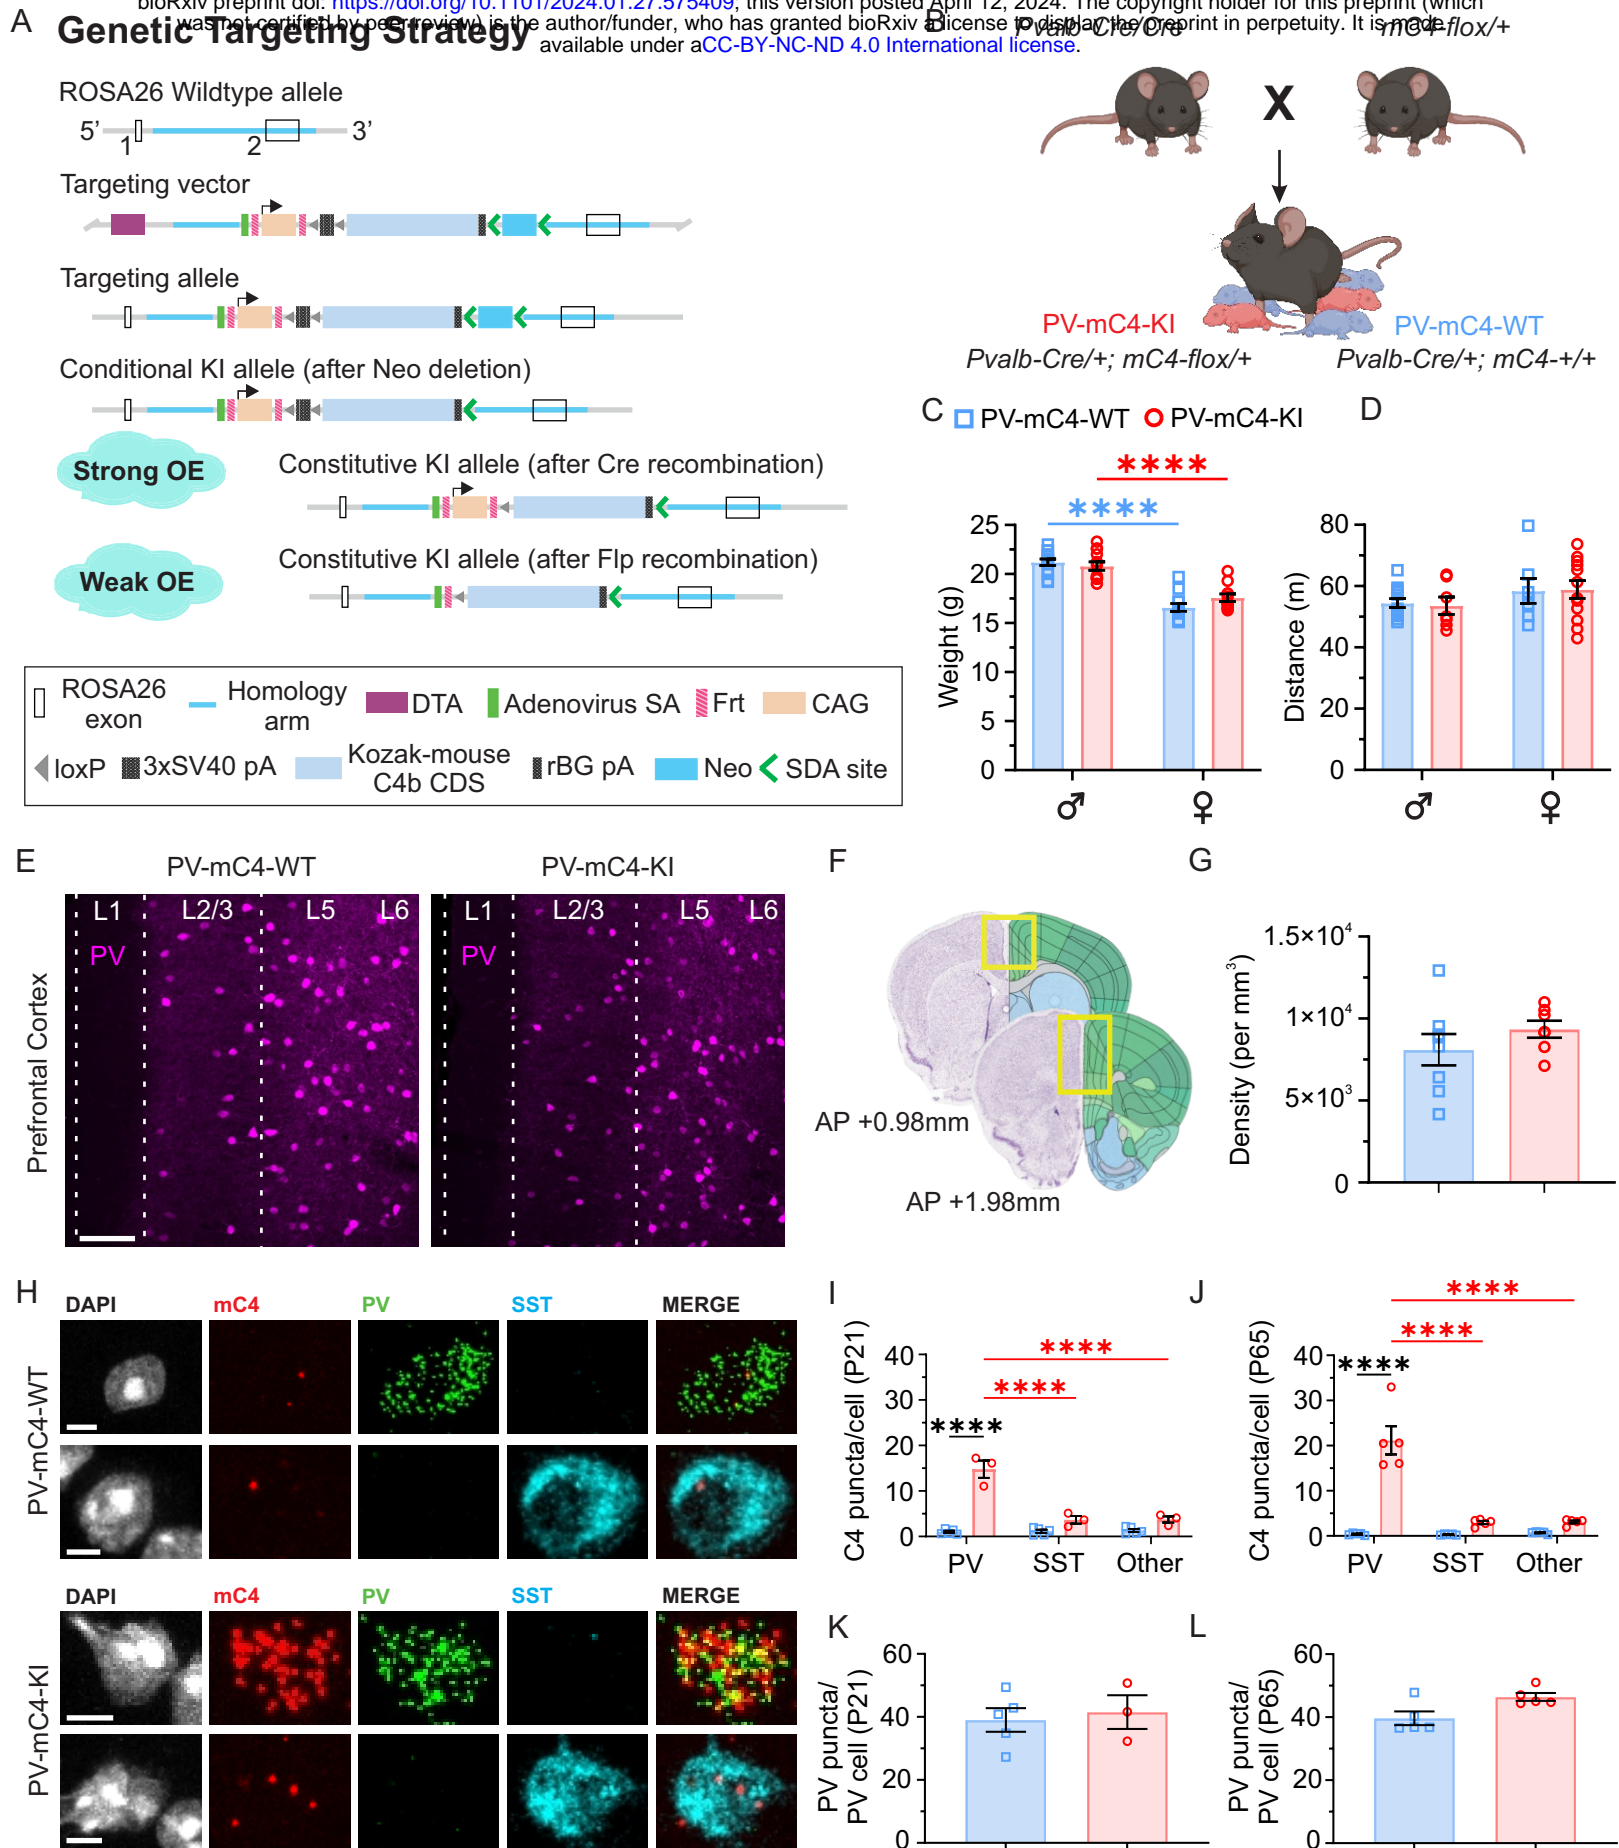

**Figure 1. A novel transgenic mouse line permits PV cell specific overexpression of complement component 4.**

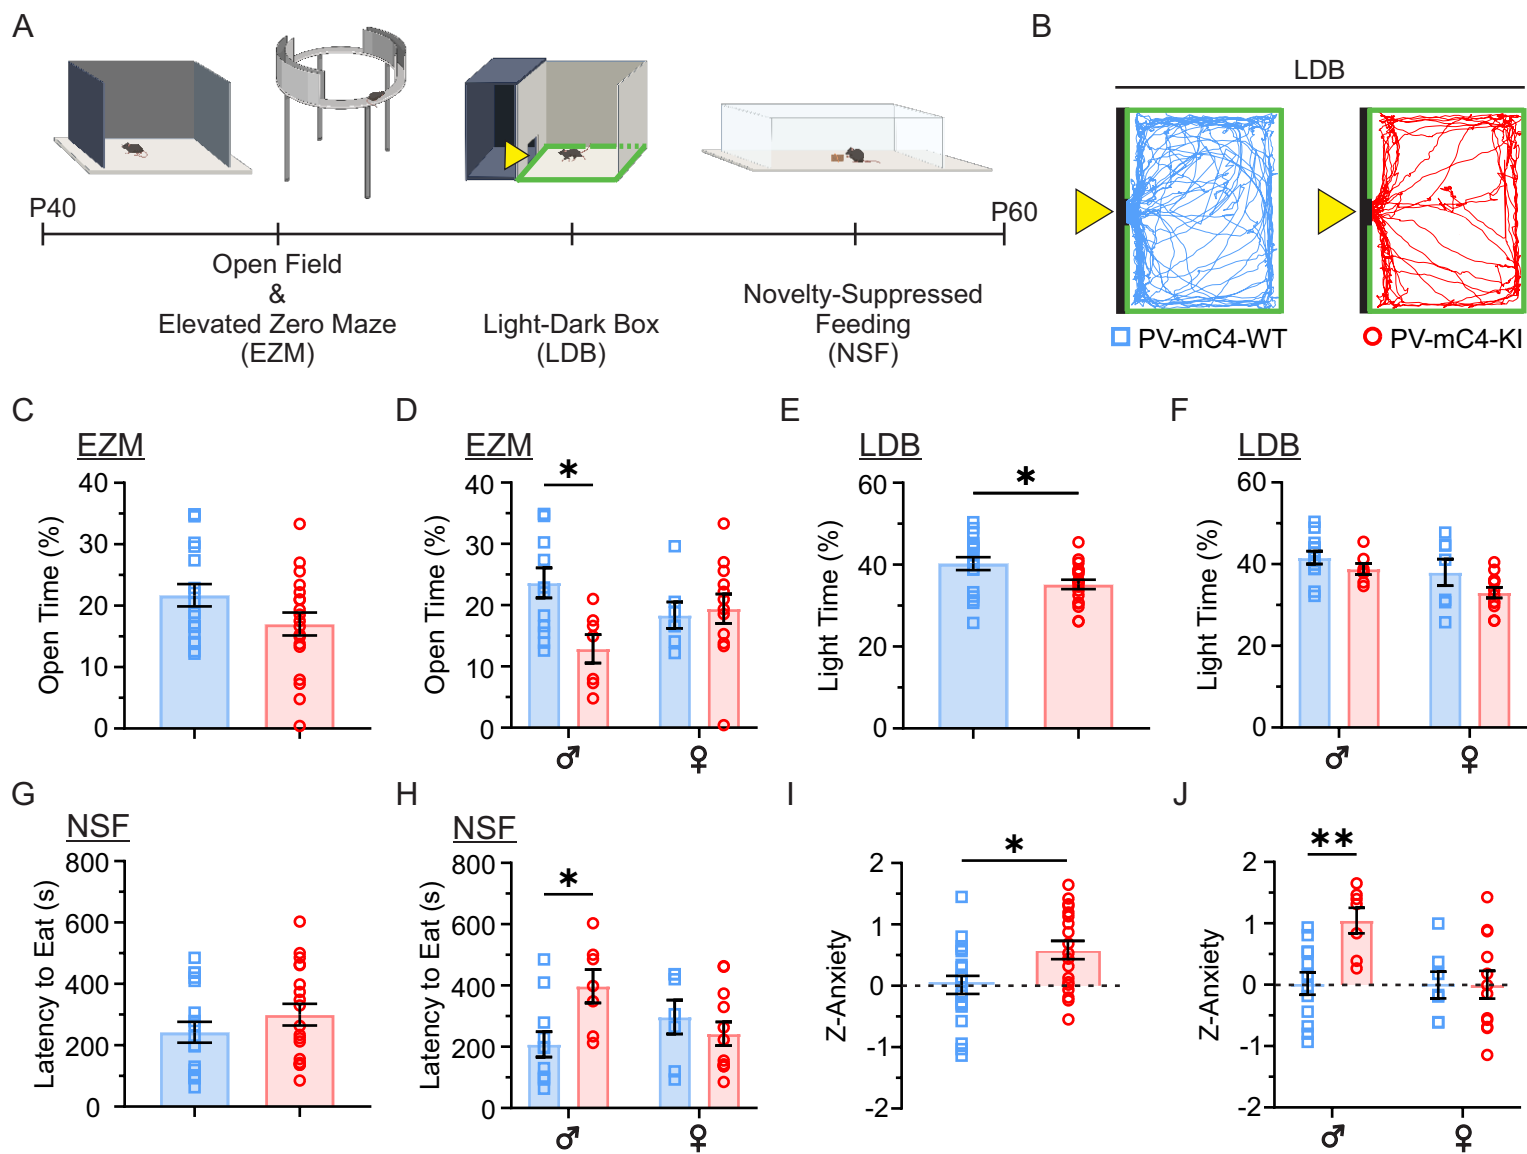

**Figure 2. PV-specific mC4-OE causes an increase in anxiety-like behavior in male mice.**

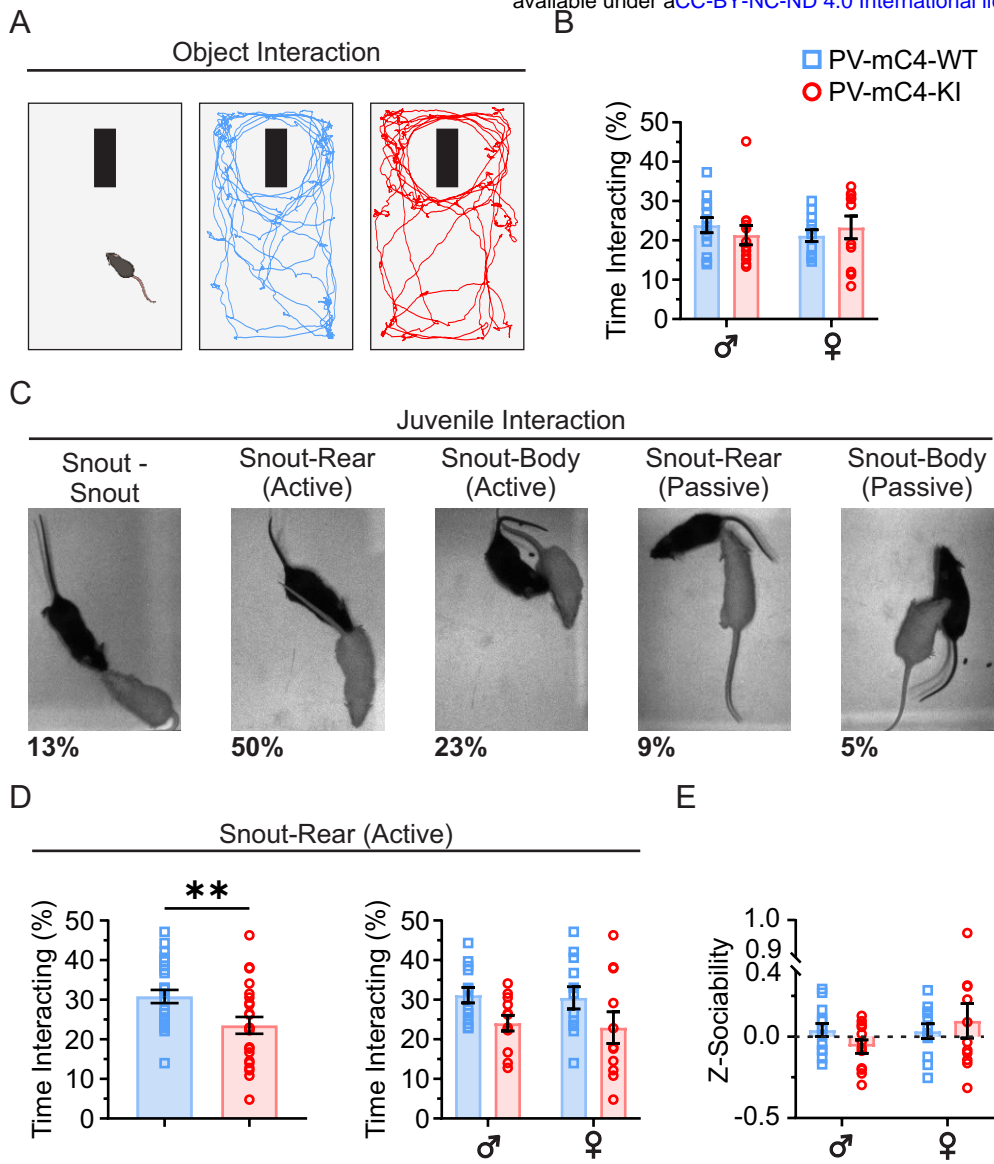

**Figure 3. Increased levels of *mC4* in PV cells disrupts active but not passive social behaviors.**



A

PV cell mEPSC

PV cell mIPSC

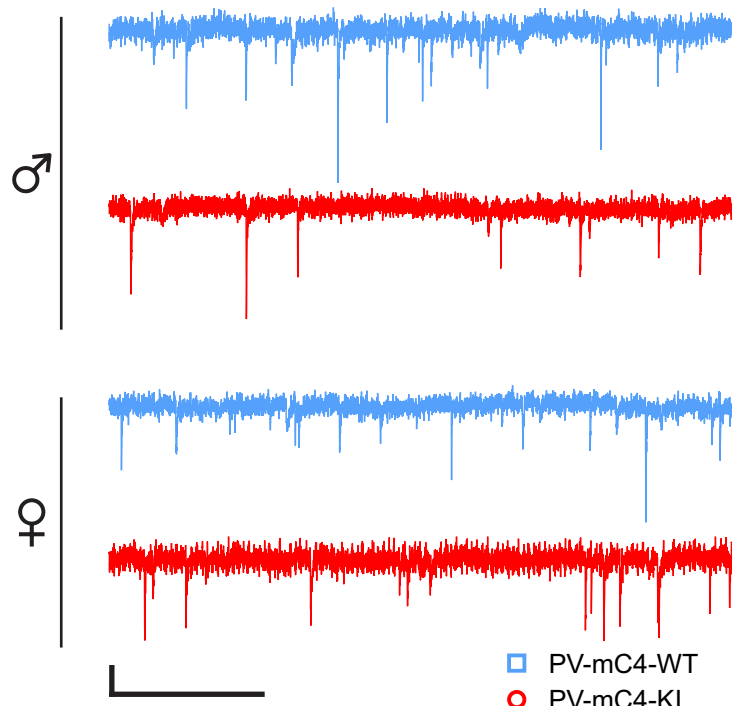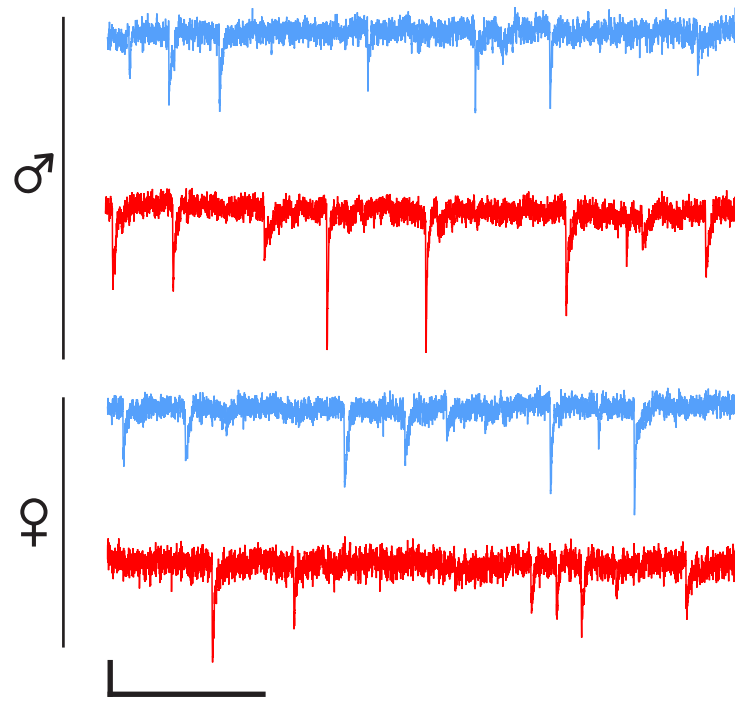

□ PV-mC4-WT  
○ PV-mC4-KI

B

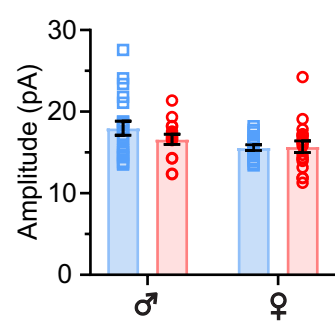

C

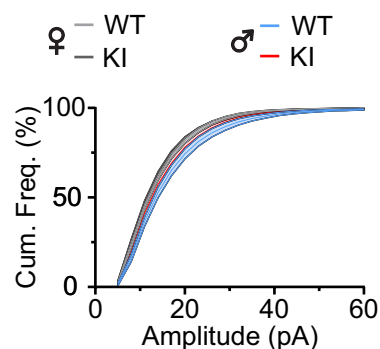

I

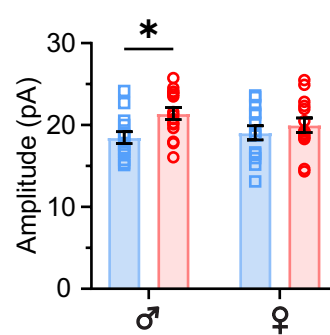

J

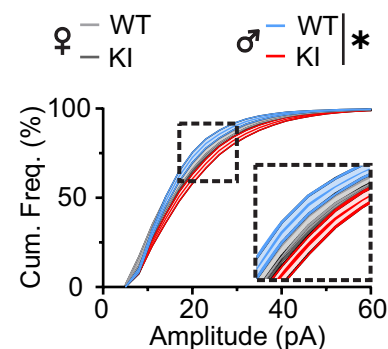

D

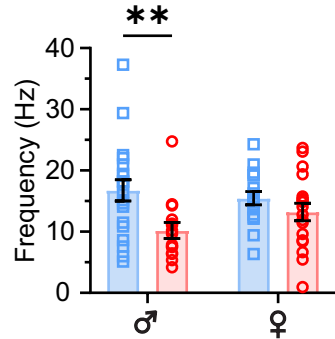

E

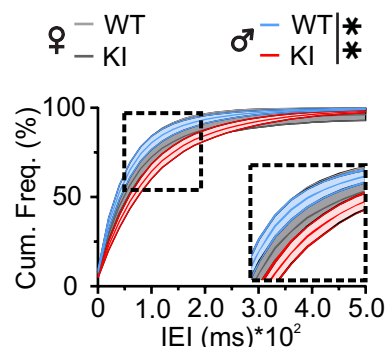

K

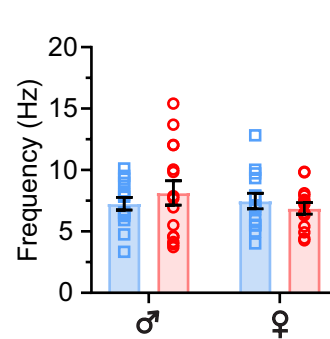

L

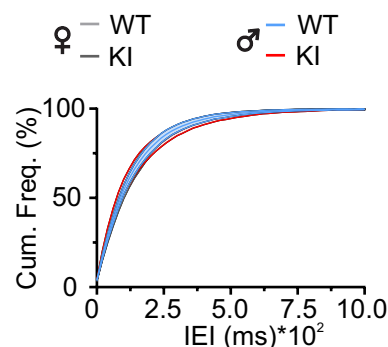

F

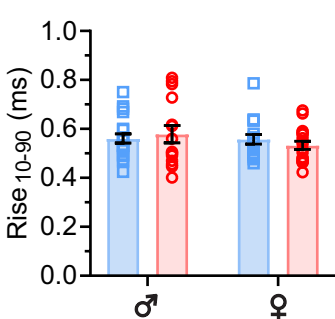

G

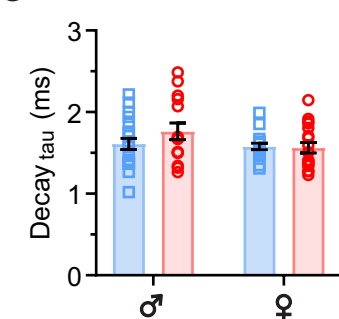

M

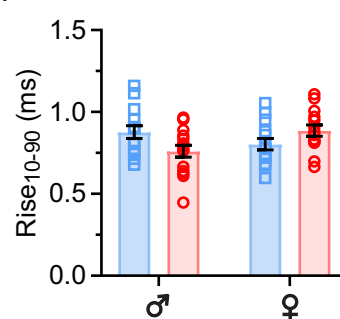

N

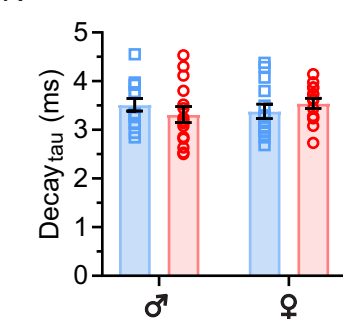

**Figure 4. Sex-related difference in excitatory-inhibitory dynamics in mPFC PV cells with increased levels of *mC4* in PV cells.**

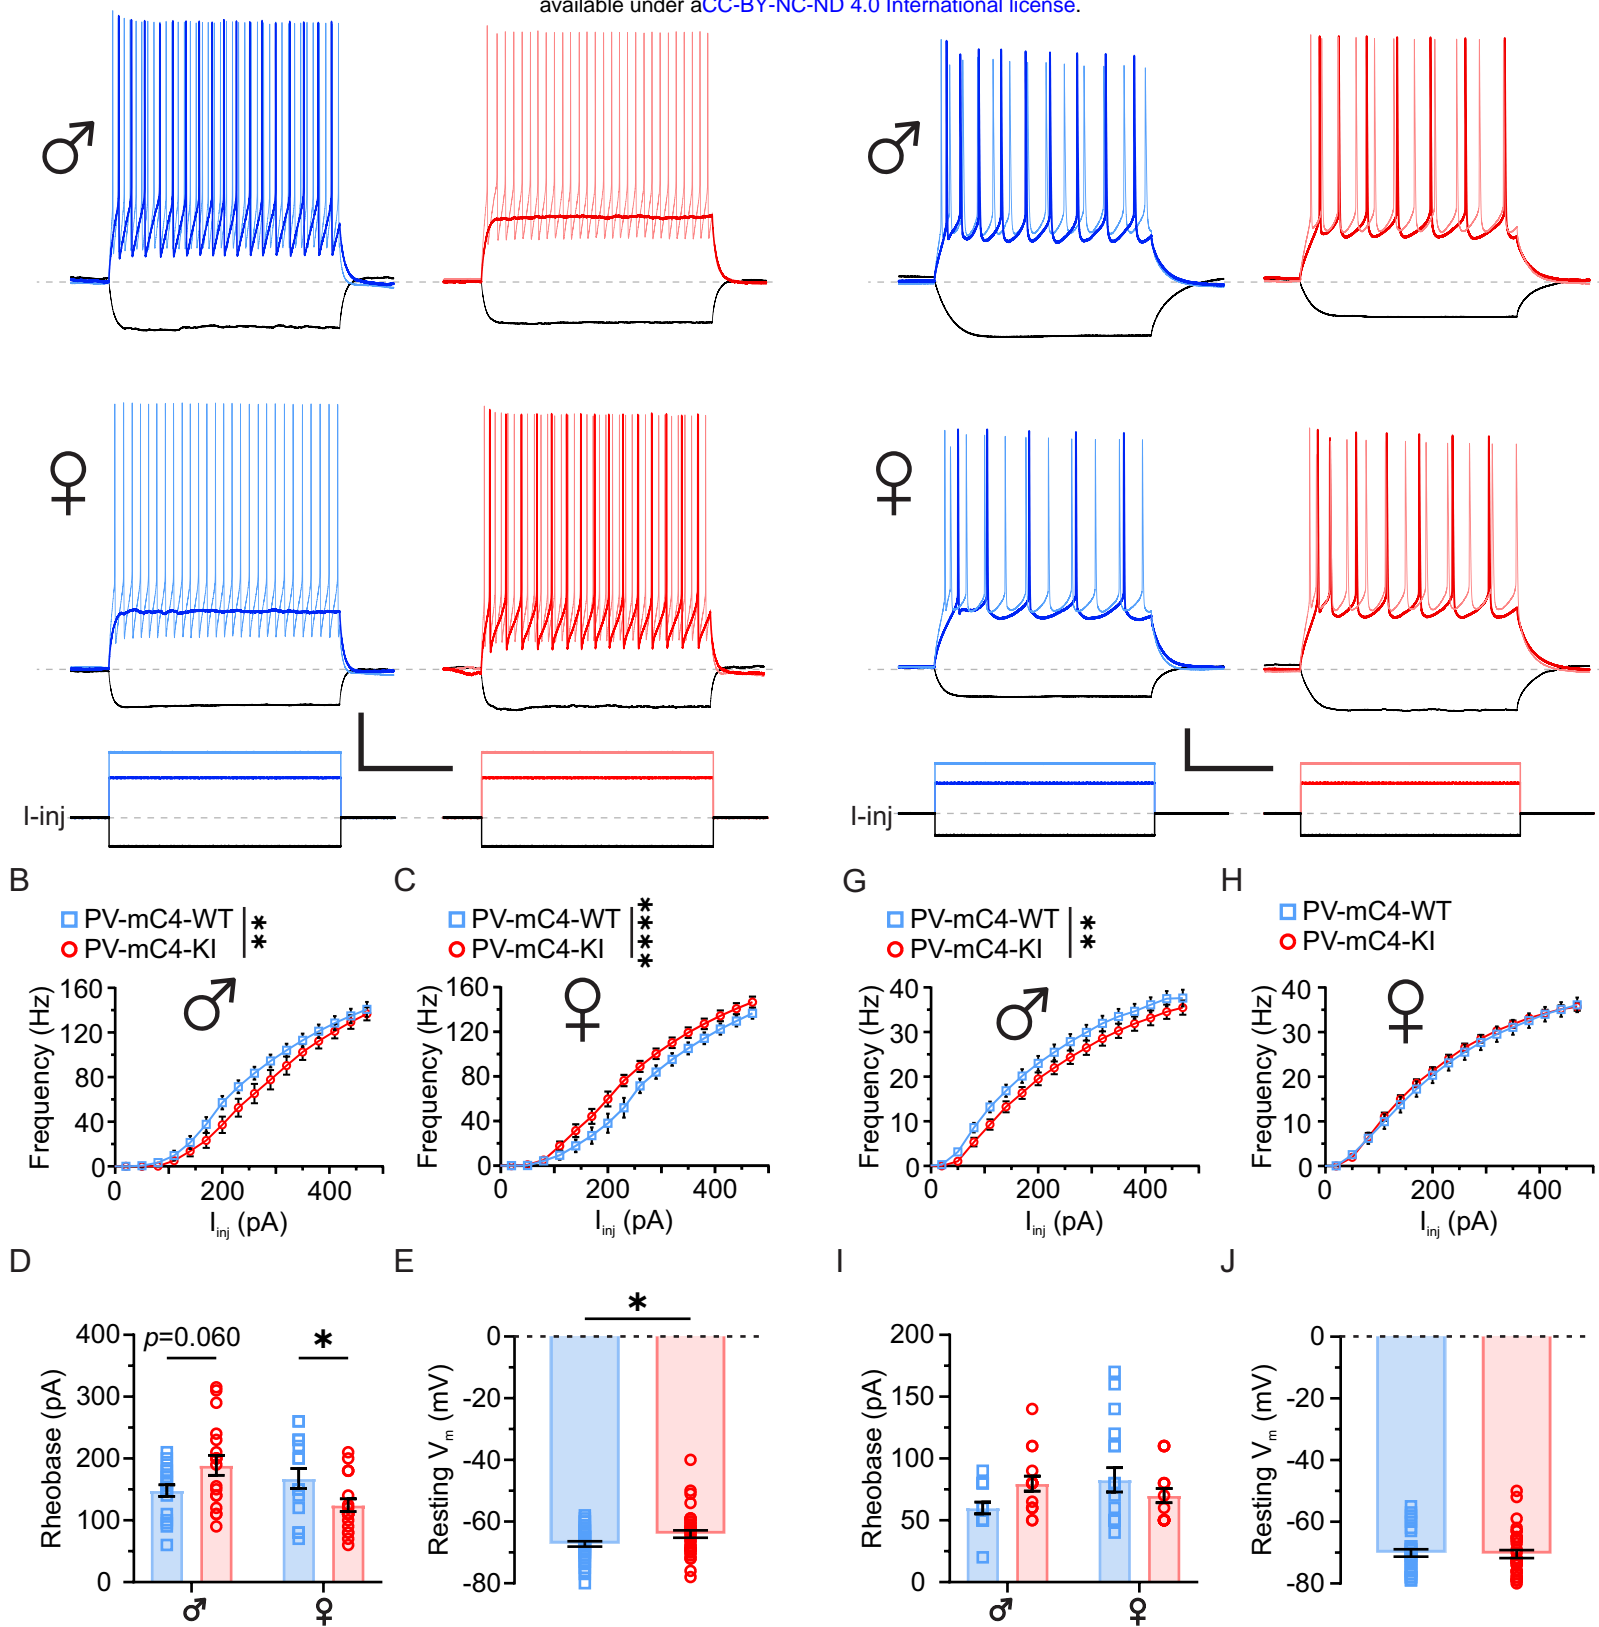

**Figure 5. PV-specific mC4-OE leads to opposing changes in excitability of PV cells in male and female mice.**

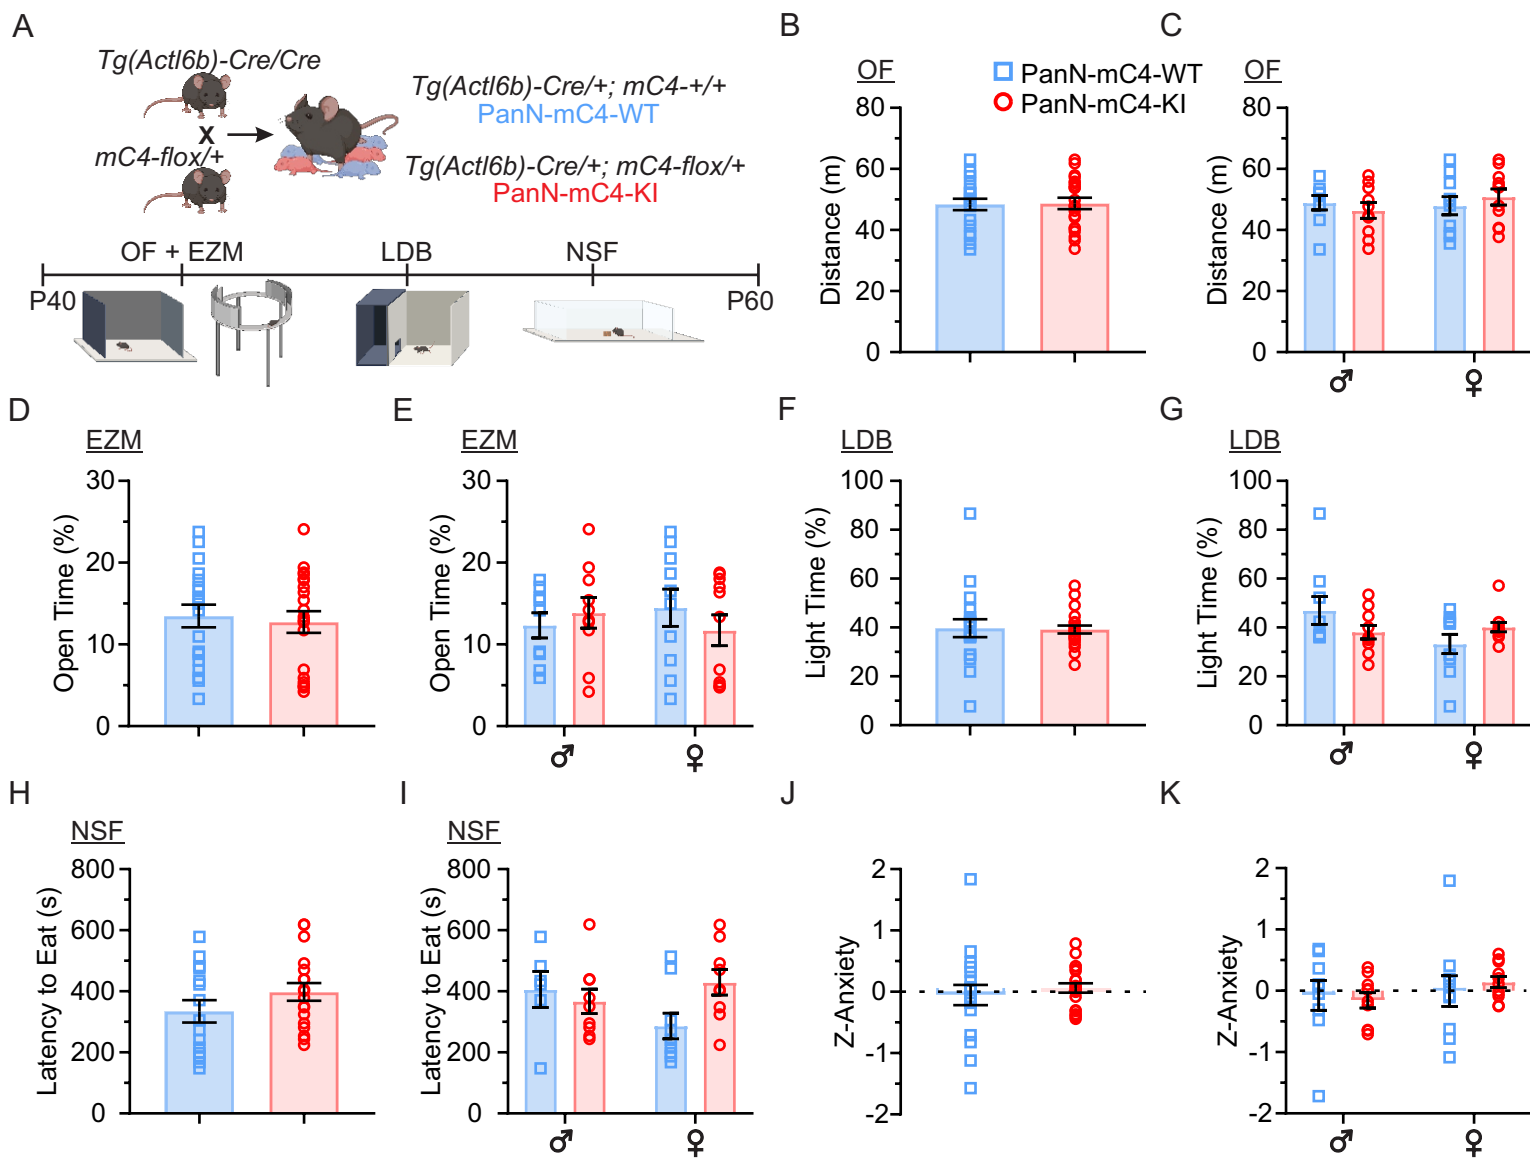

**Figure 6. No changes in anxiety-like behavior with pan-neuronal overexpression of *mC4*.**

A

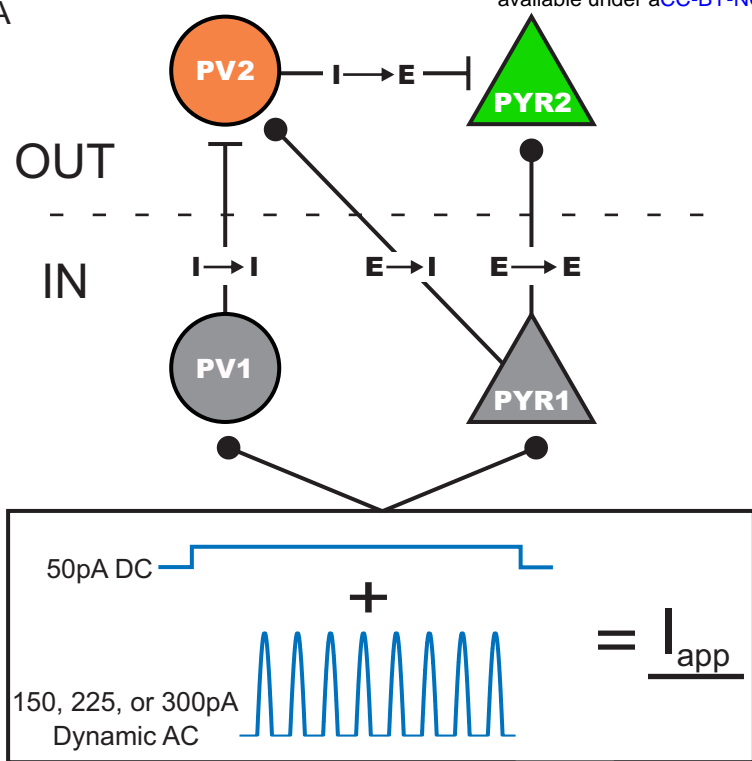

B

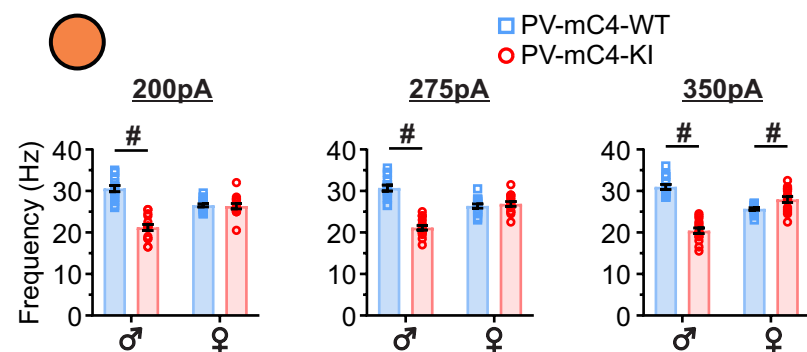

C

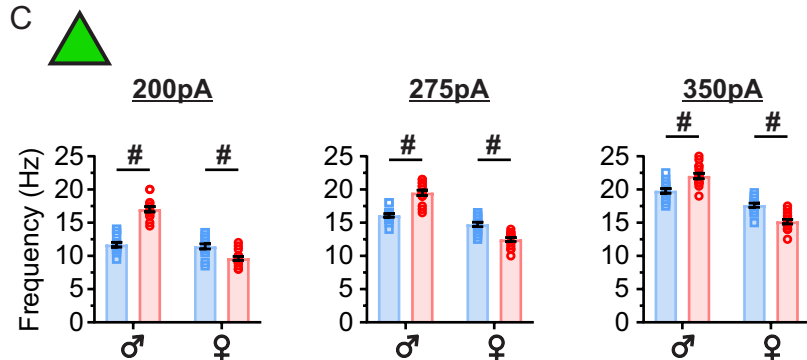

D

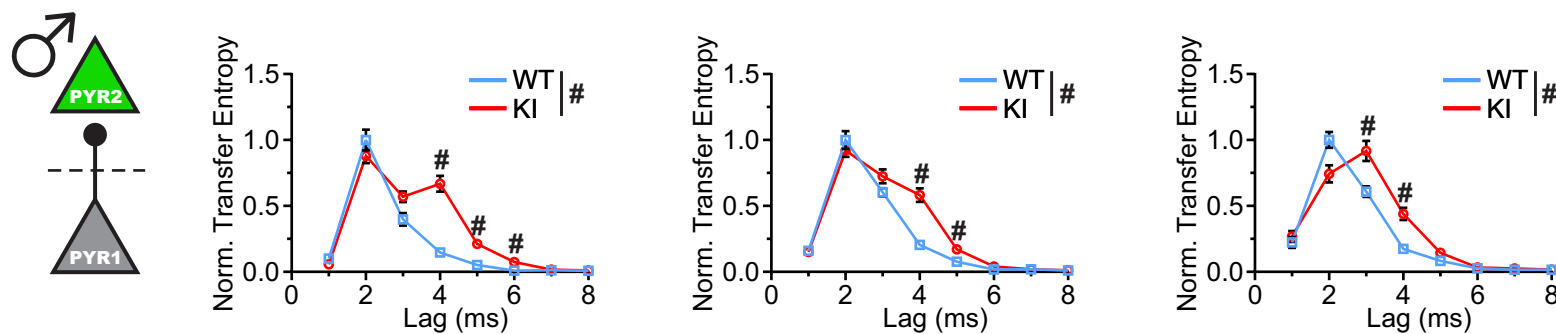

E

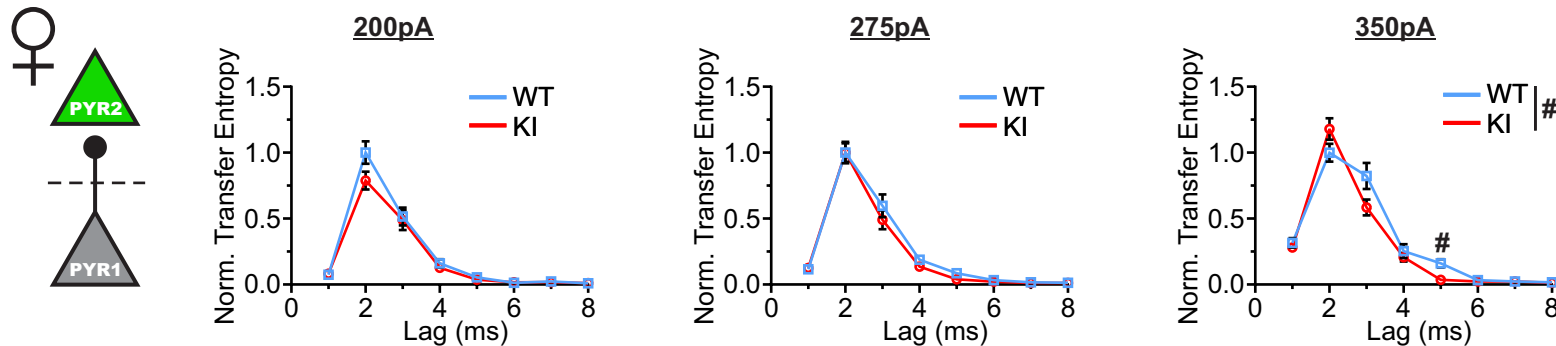

**Figure 7. Disrupted neural communication and hyperexcitability in a network model of male mice with increased levels of *mC4* in PV cells.**

A

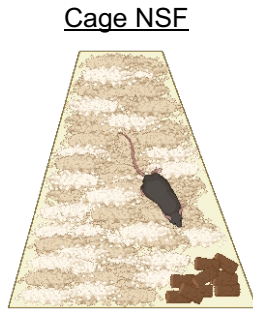

B

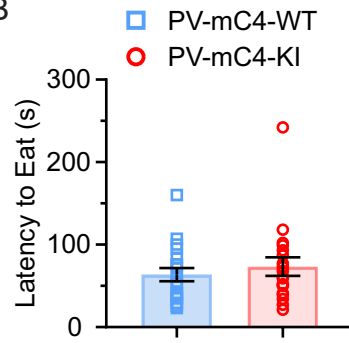

C

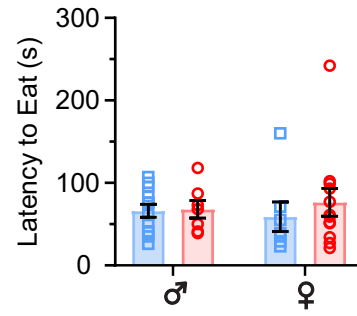

**Supplemental Figure 1. No change in latency to feed in the Cage NSF in PV-mC4-KI mice relative to controls.**



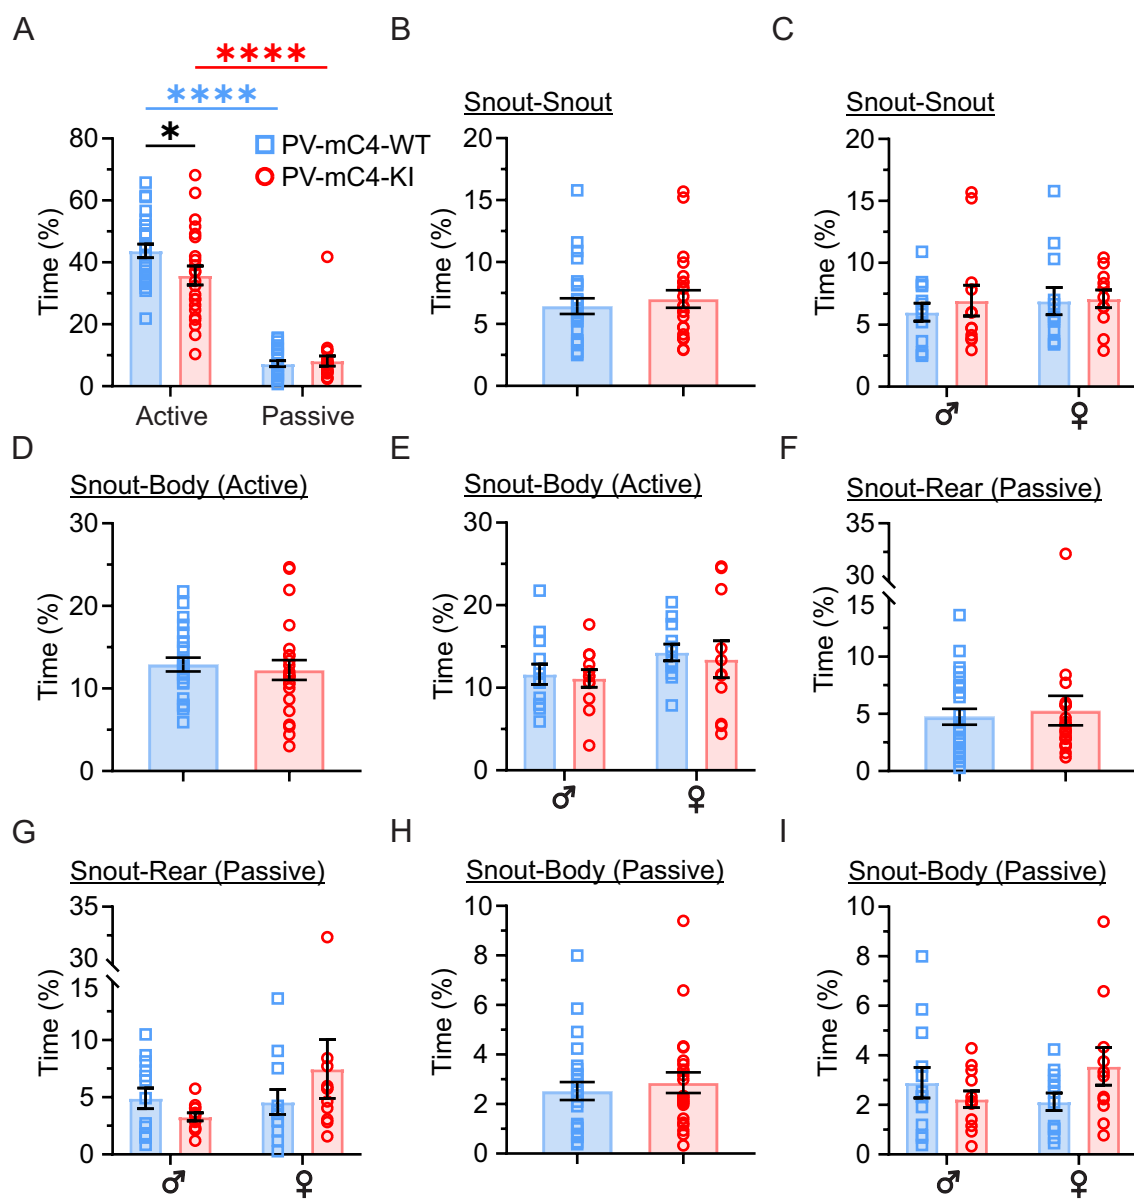

**Supplemental Figure 2. No changes in less-frequent sub-classes of social behavior with increased levels of *mC4* in PV cells.**

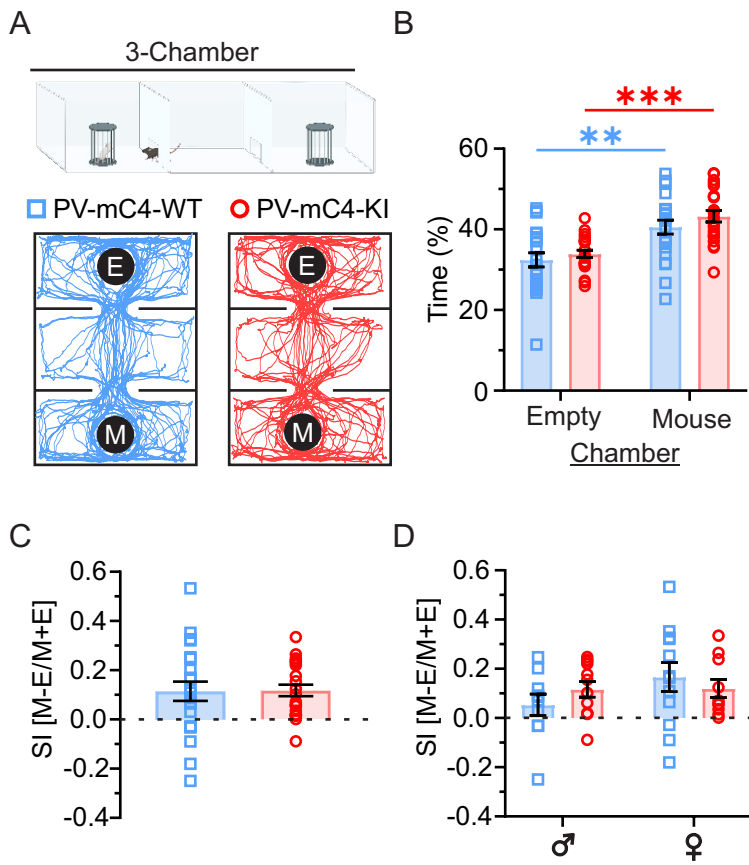

**Supplemental Figure 3. Overexpression of *mC4* in PV cells did not alter social interactions in the three-chamber assay.**

A

PYR mEPSC

PYR mIPSC

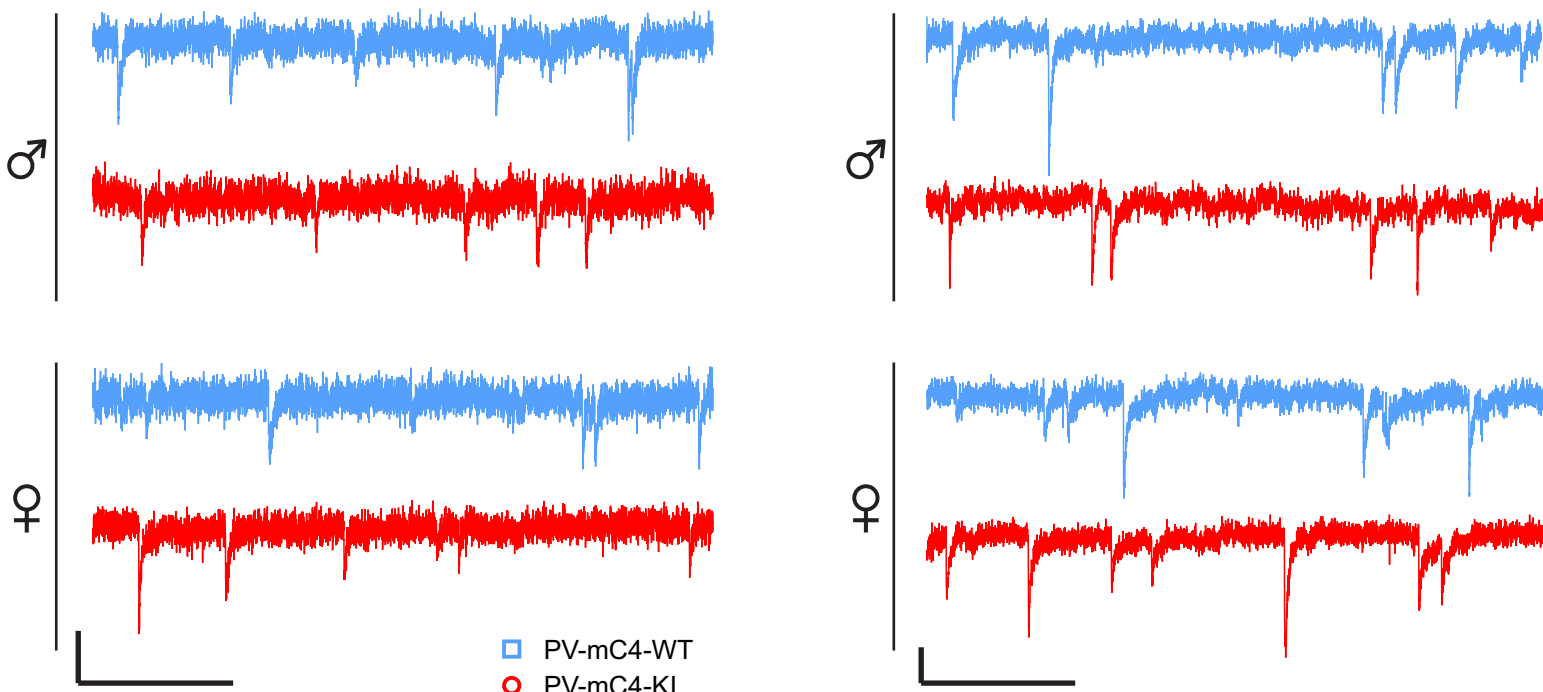

B

C

G

H

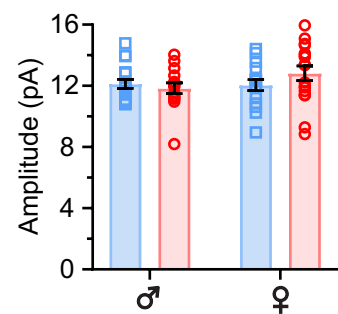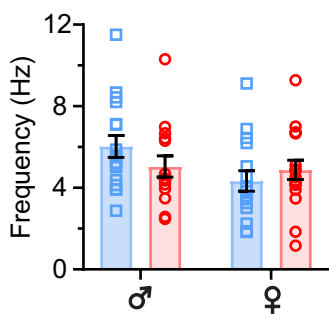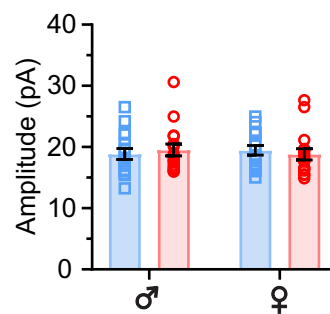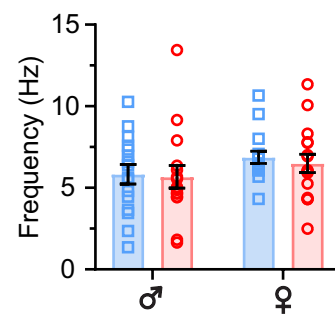

D

E

I

J

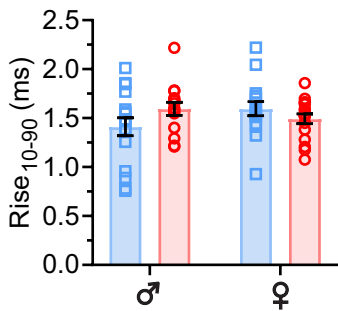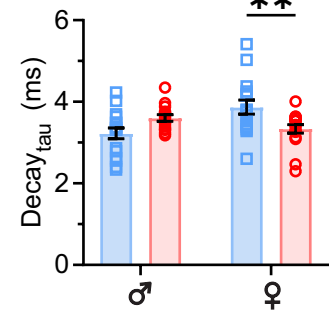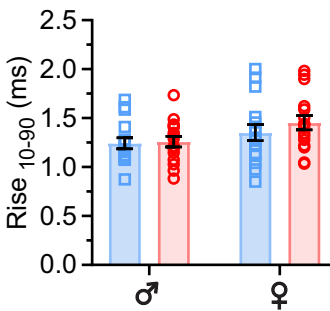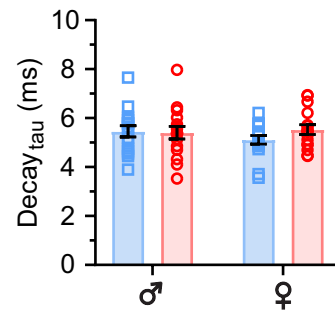

Supplemental Figure 4. PV-specific mC4-OE alters the kinetics of mEPSCs in PYRs of female mice.

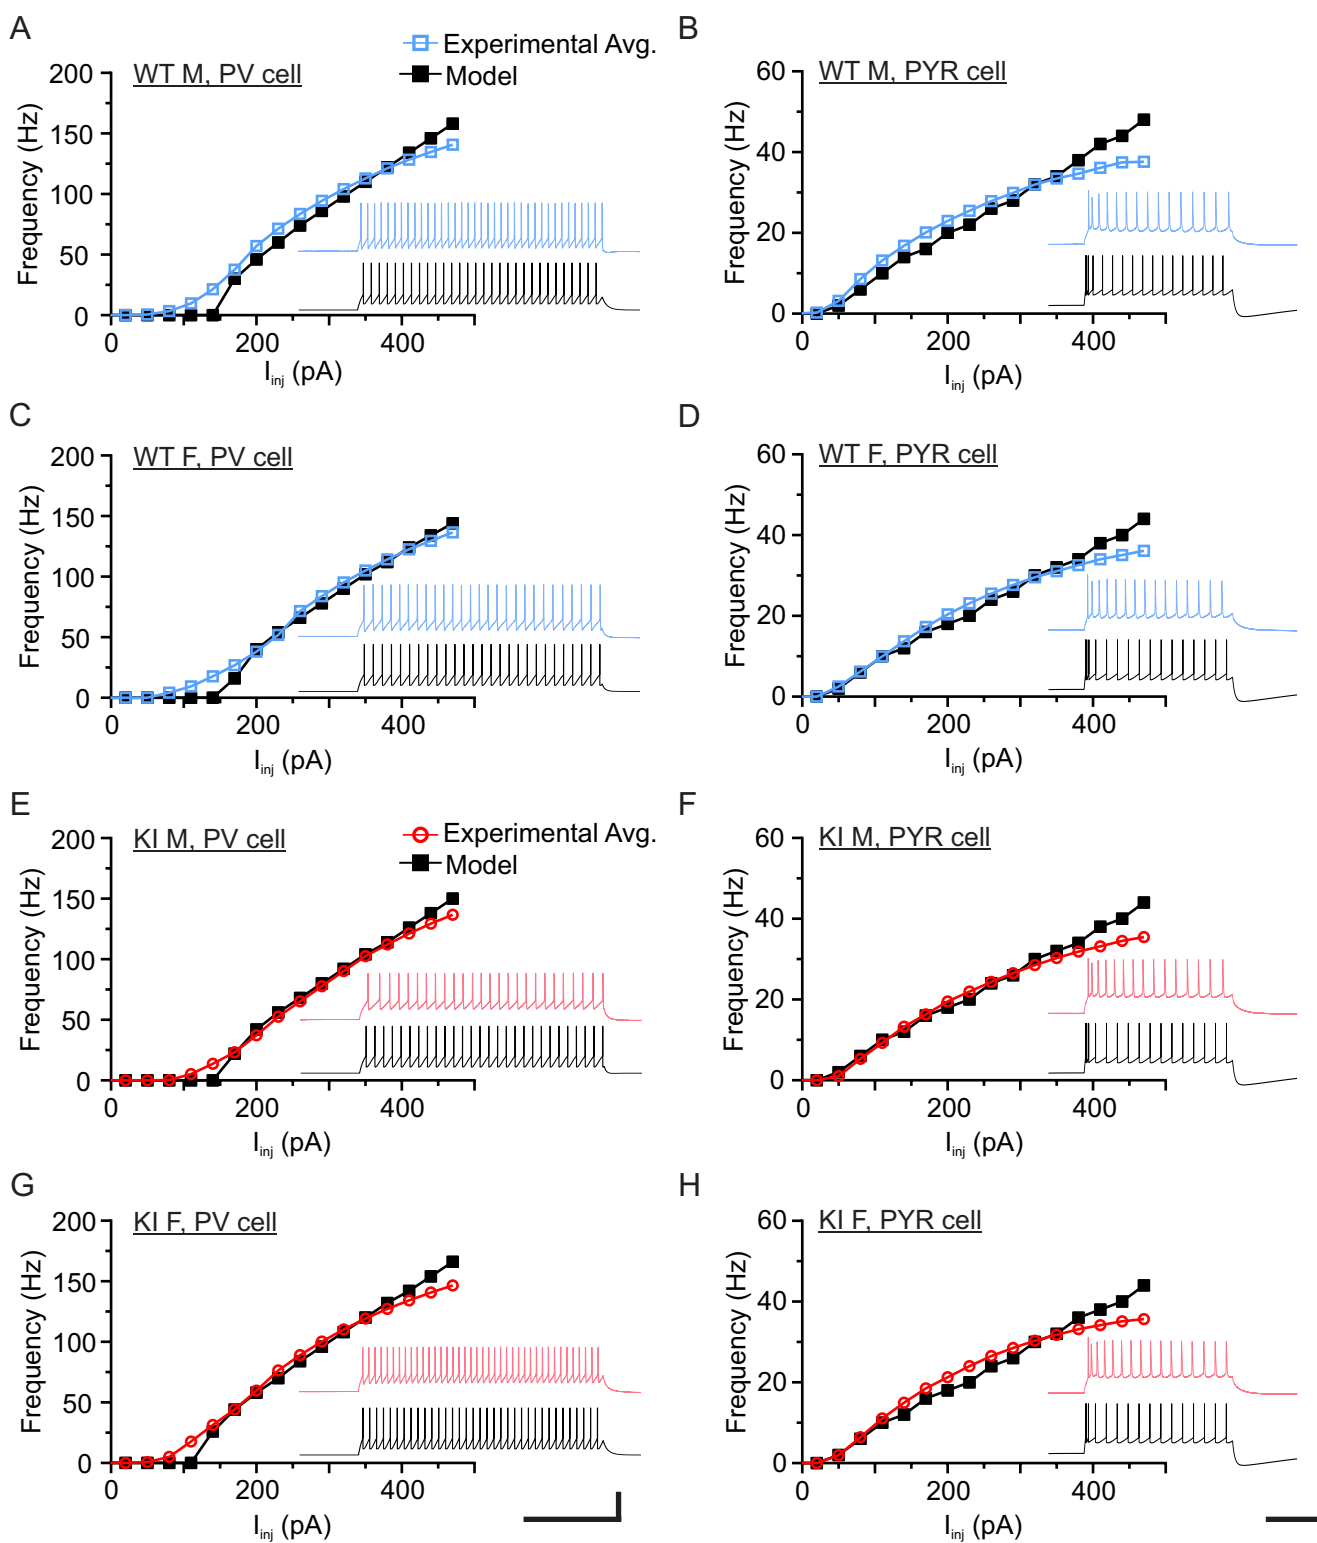

**Supplemental Figure 5. Modeled PV and PYR units have similar firing rates as experimental PV and PYR cells in acute brain slices.**

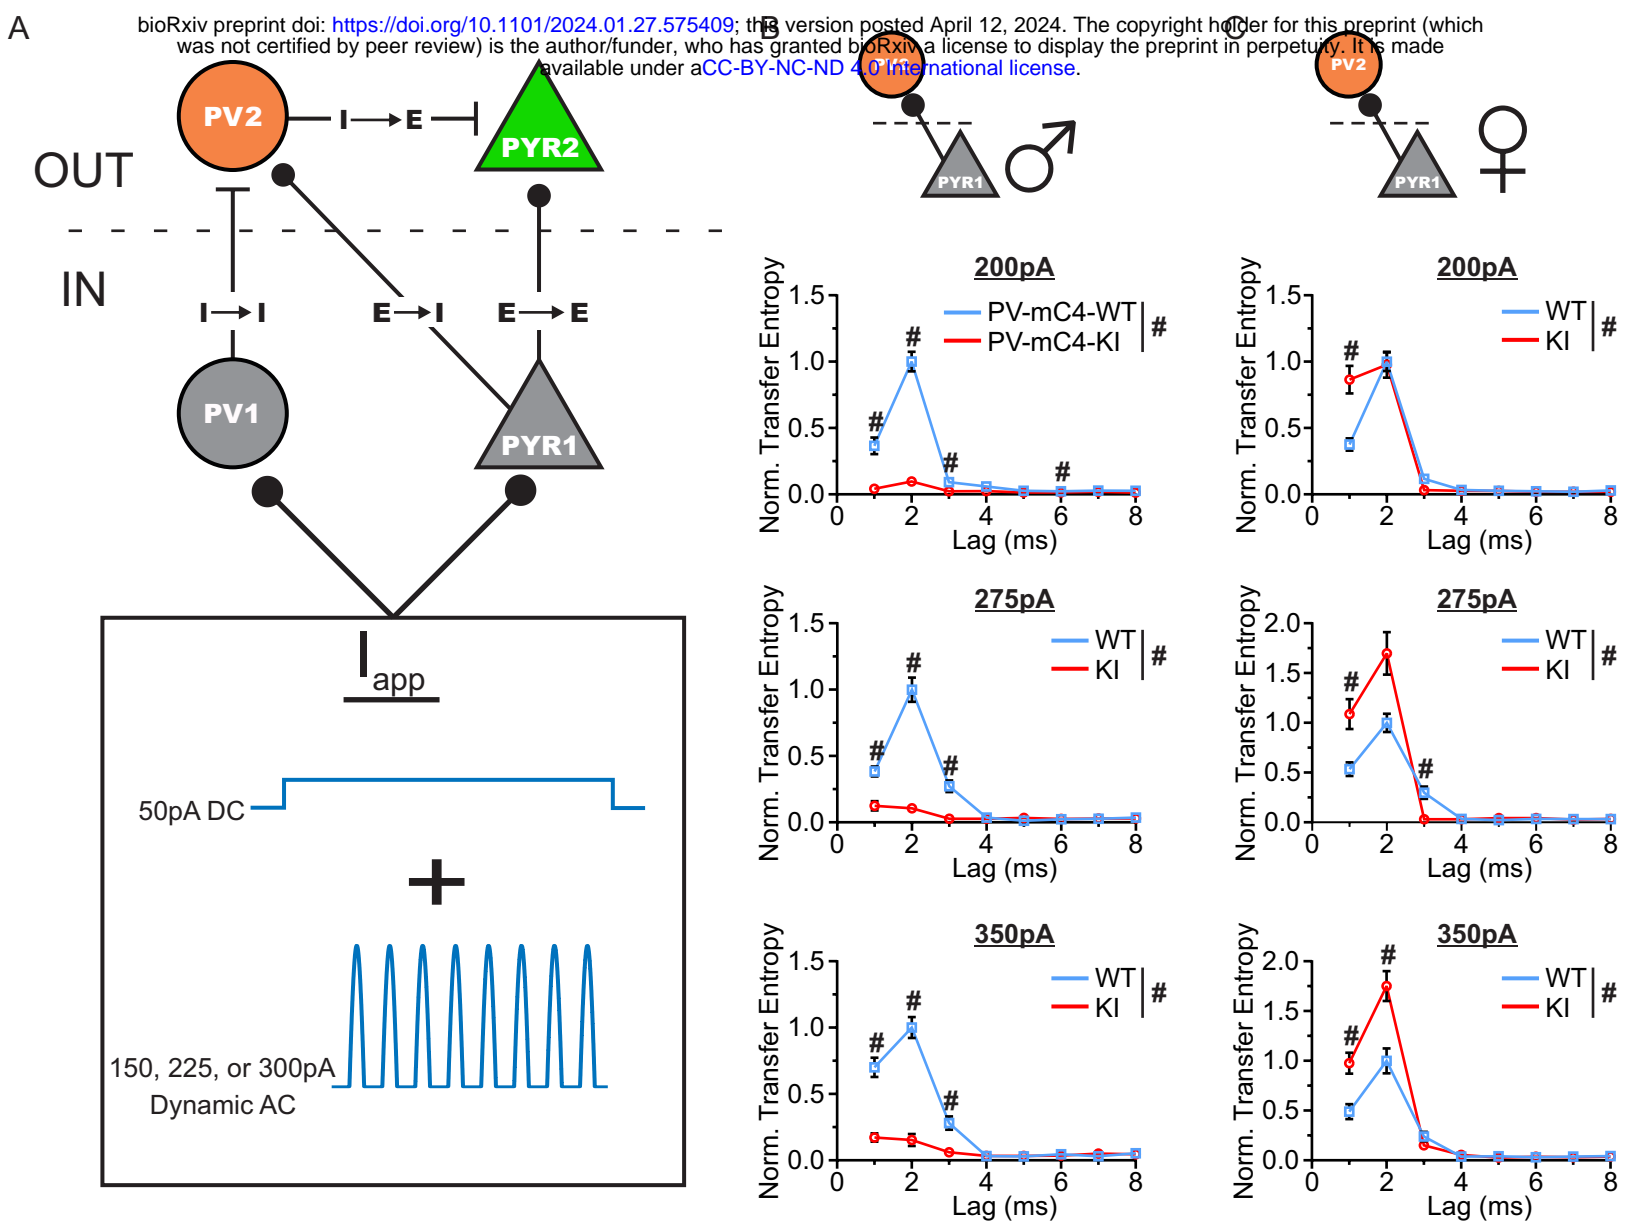

**Supplemental Figure 6. A computational model reveals that changes associated with PV-mC4-OE drive changes in PYR-PV information flow.**
